# Supplementary material for: Genome-Wide Network of lncRNA–mRNA During Ovine Oocyte Development From Germinal Vesicle to Metaphase II in vitro
Source: Front Physiol. 2020 Aug 18;11:1019. doi: 10.3389/fphys.2020.01019 (PMC7461901; doi:10.3389/fphys.2020.01019)
Supplement: TABLE S3 — Results of co-expression analysis. [file Data_Sheet_1.CSV]

	baseMean	log2FoldChange	lfcSE	stat	pvalue	padj
MSTRG.11311	1155.892666	-2.951006817	0.222377058	-13.27028445	3.44E-40	2.30E-36
MSTRG.23594	185.2786273	-4.543349002	0.350100337	-12.97727684	1.65E-38	5.51E-35
MSTRG.23281	1257.560626	-2.391029764	0.214187987	-11.16323002	6.17E-29	1.38E-25
MSTRG.16537	431.6213008	-2.739470757	0.246177334	-11.12803812	9.16E-29	1.53E-25
MSTRG.22953	5630.562313	-2.210594458	0.205811832	-10.74085216	6.54E-27	8.75E-24
MSTRG.14755	207468.8567	2.15247336	0.202200762	10.6452287	1.84E-26	2.05E-23
MSTRG.11767	9645.754493	-1.995492477	0.188103737	-10.60846801	2.72E-26	2.60E-23
MSTRG.6980	4035.881865	2.315687702	0.221511046	10.45405067	1.40E-25	1.17E-22
MSTRG.9768	1435.715516	-2.036864472	0.203892772	-9.989880742	1.69E-23	1.25E-20
MSTRG.19875	4424.201031	2.101752816	0.211497962	9.937461338	2.86E-23	1.91E-20
MSTRG.1102	1007.585853	2.629249416	0.265370317	9.907850445	3.85E-23	2.34E-20
MSTRG.15157	296.6144867	-3.067616191	0.31444565	-9.755632476	1.75E-22	9.73E-20
MSTRG.4843	1030.735516	-2.103597682	0.218848668	-9.612110958	7.11E-22	3.66E-19
MSTRG.14393	1303.559271	-2.351905832	0.246659066	-9.535047163	1.50E-21	7.16E-19
MSTRG.3759	326.2273114	-2.48865136	0.262904114	-9.466003878	2.91E-21	1.30E-18
MSTRG.16133	409.8995282	-2.19048876	0.232884729	-9.405892628	5.16E-21	2.16E-18
MSTRG.7933	764.3708964	2.150302244	0.230981198	9.309425459	1.29E-20	5.06E-18
MSTRG.3118	596.781553	-2.742508839	0.299765525	-9.14884671	5.75E-20	2.14E-17
MSTRG.619	202.600775	2.72857085	0.298996686	9.125756158	7.12E-20	2.51E-17
MSTRG.12255	930.8053251	1.807580532	0.199829611	9.045609013	1.49E-19	4.74E-17
MSTRG.23819	268.5400111	2.619353696	0.289486072	9.0482892	1.45E-19	4.74E-17
MSTRG.13830	2061.717108	1.97317753	0.21857998	9.02725642	1.76E-19	5.35E-17
MSTRG.6040	4427.475315	-1.885796202	0.210165885	-8.972893966	2.89E-19	8.40E-17
MSTRG.19002	121.8503001	-2.923797574	0.332654573	-8.789290199	1.51E-18	4.19E-16
MSTRG.8763	206.8824883	-2.517442793	0.286976596	-8.772293035	1.75E-18	4.68E-16
MSTRG.22734	335.1958927	-2.302786877	0.263091798	-8.752788554	2.08E-18	5.35E-16
MSTRG.1858	1799.164419	2.060835136	0.237180381	8.688893764	3.66E-18	9.07E-16
MSTRG.18704	1171.296383	2.485046734	0.286958964	8.659937642	4.72E-18	1.13E-15
MSTRG.10658	547.8399145	-2.015658759	0.233356517	-8.637679305	5.74E-18	1.28E-15
MSTRG.21383	1421.708544	2.107163009	0.243948739	8.637728651	5.73E-18	1.28E-15
MSTRG.11803	6971.191055	2.394801758	0.279884125	8.556404387	1.16E-17	2.51E-15
MSTRG.10545	19781.82359	-2.625369458	0.307457183	-8.538975828	1.35E-17	2.74E-15
MSTRG.20042	886.9151518	-2.557943899	0.29947174	-8.541520128	1.32E-17	2.74E-15
MSTRG.15403	75.71015293	7.646252797	0.900668237	8.489533083	2.07E-17	4.08E-15
MSTRG.10690	374.3908139	2.166155838	0.255383206	8.481982303	2.21E-17	4.23E-15
MSTRG.16918	2415.812374	1.764006068	0.208345739	8.466724938	2.52E-17	4.69E-15
MSTRG.2748	104.8882276	4.352998946	0.514492629	8.46076056	2.66E-17	4.80E-15
MSTRG.163	1567.127912	-2.58600314	0.305858188	-8.454908968	2.79E-17	4.92E-15
MSTRG.24037	1133.28562	2.504098065	0.298179061	8.397967519	4.54E-17	7.79E-15
MSTRG.5315	394.3292667	-1.958868514	0.233373784	-8.393695635	4.71E-17	7.88E-15
MSTRG.52	217.1662398	-3.227252697	0.387349978	-8.33161968	7.97E-17	1.30E-14
MSTRG.15667	1252.116882	-1.895122122	0.228604007	-8.289977722	1.13E-16	1.80E-14
MSTRG.19942	15877.03872	2.41194049	0.291862841	8.263951937	1.41E-16	2.19E-14
MSTRG.15760	154.5486631	-3.212450844	0.389893832	-8.23929639	1.73E-16	2.63E-14
MSTRG.5591	813.9388963	-2.135680502	0.260093533	-8.211201877	2.19E-16	3.26E-14
MSTRG.10319	9098.585062	1.860507511	0.226862415	8.201038973	2.38E-16	3.47E-14
MSTRG.11435	433.9803476	2.202258091	0.269870309	8.160431214	3.34E-16	4.75E-14
MSTRG.17300	508.6089004	-2.470681405	0.303847192	-8.131328744	4.25E-16	5.92E-14
MSTRG.16687	131.4075754	-2.955235894	0.363671135	-8.126121669	4.43E-16	6.05E-14
MSTRG.15954	621.4243313	2.302247412	0.28381354	8.111830783	4.99E-16	6.67E-14
MSTRG.2364	1544.794598	2.077440989	0.256452784	8.10067629	5.47E-16	7.17E-14
MSTRG.3123	1891.067833	1.704764801	0.211003612	8.079315738	6.51E-16	8.38E-14
MSTRG.23450	656.4990863	2.334728942	0.289360451	8.068583427	7.11E-16	8.98E-14
MSTRG.16509	2495.06912	-1.583632568	0.19666978	-8.052241534	8.13E-16	1.01E-13
MSTRG.11305	242.8880006	-2.521763658	0.315526508	-7.992240242	1.33E-15	1.55E-13
MSTRG.21181	259.4995909	2.164420265	0.270729192	7.994779776	1.30E-15	1.55E-13
MSTRG.24022	8561.153336	2.284879557	0.285826318	7.993943913	1.31E-15	1.55E-13
MSTRG.23003	2746.841959	2.021002598	0.253569704	7.970205298	1.58E-15	1.83E-13
MSTRG.19246	383.7055835	-2.400545625	0.303340311	-7.913704638	2.50E-15	2.83E-13
MSTRG.8035	132.5330461	-2.69271916	0.340592575	-7.905983164	2.66E-15	2.96E-13
MSTRG.23675	1593.743562	1.923819851	0.243632857	7.89638916	2.87E-15	3.15E-13
MSTRG.18191	362.5814703	-2.786001188	0.353930249	-7.871610844	3.50E-15	3.72E-13
MSTRG.3100	5413.935079	1.70477117	0.216547674	7.872498183	3.48E-15	3.72E-13
MSTRG.13580	517.4340618	2.140361827	0.272127699	7.865284693	3.68E-15	3.85E-13
MSTRG.10892	578.8118732	1.841651482	0.234623859	7.849378526	4.18E-15	4.30E-13
MSTRG.15030	1532.43053	-3.628723926	0.462588537	-7.844387908	4.35E-15	4.41E-13
MSTRG.8332	186.812942	-2.161071438	0.276293014	-7.821665136	5.21E-15	5.20E-13
MSTRG.11689	907.313044	1.587503867	0.203265484	7.810002146	5.72E-15	5.63E-13
MSTRG.3873	153.3088114	-2.398926864	0.307233829	-7.808146877	5.80E-15	5.63E-13
MSTRG.20018	145.7573438	3.066085835	0.392838648	7.804949564	5.95E-15	5.69E-13
MSTRG.5208	171.6543312	3.180146629	0.408310562	7.788548542	6.78E-15	6.39E-13
MSTRG.20559	972.0476314	2.074871577	0.266677665	7.780447504	7.23E-15	6.71E-13
MSTRG.4683	2091.670129	-2.018662102	0.260324168	-7.754416805	8.88E-15	8.13E-13
MSTRG.5648	192.4311059	-1.963199746	0.253352477	-7.748887112	9.27E-15	8.38E-13
MSTRG.9914	2589.136339	1.887994103	0.243722401	7.746493932	9.45E-15	8.42E-13
MSTRG.15847	148.5324386	2.118416278	0.273720724	7.739334635	9.99E-15	8.80E-13
MSTRG.18603	20026.97941	-1.411653043	0.18286699	-7.719561878	1.17E-14	1.01E-12
MSTRG.2633	7778.357058	1.517278874	0.196720103	7.712881655	1.23E-14	1.05E-12
MSTRG.24280	138339.8782	1.540223303	0.199787789	7.709296499	1.27E-14	1.07E-12
MSTRG.18149	917.7415274	1.581913717	0.206131781	7.674283451	1.66E-14	1.37E-12
MSTRG.23325	123.2437181	2.251696362	0.293409418	7.674247059	1.66E-14	1.37E-12
MSTRG.11504	535.9733881	1.754791906	0.229420571	7.648799307	2.03E-14	1.65E-12
MSTRG.16776	279.1040673	2.2918972	0.299772361	7.645458693	2.08E-14	1.66E-12
MSTRG.2783	739.9495137	-1.737683229	0.227257873	-7.646305955	2.07E-14	1.66E-12
MSTRG.15382	2334.05947	2.804119331	0.366892476	7.642891349	2.12E-14	1.67E-12
MSTRG.9971	90.06358997	-3.181718705	0.416462639	-7.639865868	2.17E-14	1.69E-12
MSTRG.1977	141.5608802	2.310152333	0.302647966	7.633133507	2.29E-14	1.76E-12
MSTRG.2066	75.76979659	-2.866254275	0.377128879	-7.600198325	2.96E-14	2.25E-12
MSTRG.13762	553.5272008	1.879068533	0.24819446	7.570952778	3.70E-14	2.78E-12
MSTRG.20155	454.3554947	-1.68750189	0.223158103	-7.561911794	3.97E-14	2.95E-12
MSTRG.10624	284.4788403	2.383432066	0.315862283	7.545795084	4.50E-14	3.30E-12
MSTRG.20654	767.0768507	1.525842417	0.202266063	7.54373916	4.57E-14	3.32E-12
MSTRG.12564	2645.185647	1.71830926	0.227882683	7.540323999	4.69E-14	3.37E-12
MSTRG.18931	13200.89691	1.985885755	0.264326803	7.512994278	5.78E-14	4.11E-12
MSTRG.6638	70.38536294	-3.091336459	0.412707393	-7.490383048	6.87E-14	4.84E-12
MSTRG.21206	338.8572227	-2.716815252	0.363748349	-7.468941802	8.08E-14	5.63E-12
MSTRG.13132	213.3207478	-1.996814506	0.267600508	-7.461923451	8.53E-14	5.88E-12
MSTRG.20431	3123.287497	2.089360074	0.2804633	7.44967372	9.36E-14	6.39E-12
MSTRG.14468	222.0296709	-1.952418527	0.263061305	-7.421914538	1.15E-13	7.80E-12
MSTRG.13871	424.056785	-1.848674311	0.249251474	-7.416904233	1.20E-13	7.88E-12
MSTRG.15936	737.7649138	-2.981541792	0.402009114	-7.416602476	1.20E-13	7.88E-12
MSTRG.24072	823.2457476	-2.480341619	0.334392191	-7.417462736	1.19E-13	7.88E-12
MSTRG.24896	70.24745095	-3.75617574	0.507801043	-7.396943723	1.39E-13	9.05E-12
MSTRG.15472	232.4918262	2.032193325	0.27563461	7.372779947	1.67E-13	1.07E-11
MSTRG.16019	107.0114485	-2.289604022	0.311537234	-7.349375208	1.99E-13	1.27E-11
MSTRG.19011	343.7099842	-1.868151873	0.255089063	-7.323527927	2.42E-13	1.52E-11
MSTRG.4016	391.2579802	-2.271566248	0.31023045	-7.322189836	2.44E-13	1.53E-11
MSTRG.14766	51.91056503	2.940913282	0.402043162	7.314919298	2.58E-13	1.60E-11
MSTRG.15555	642.7059773	1.90094979	0.260213438	7.305348262	2.77E-13	1.67E-11
MSTRG.18653	249.2800453	2.17811585	0.298144698	7.305566283	2.76E-13	1.67E-11
MSTRG.23039	521.8209952	-2.967636883	0.406169752	-7.306395587	2.74E-13	1.67E-11
MSTRG.20964	1872.952076	2.710685465	0.372375501	7.279440924	3.35E-13	2.00E-11
MSTRG.21945	704.4446886	2.193159099	0.303333375	7.23019384	4.82E-13	2.85E-11
MSTRG.4867	1359.95948	1.693395296	0.234586486	7.218639602	5.25E-13	3.08E-11
MSTRG.4908	134.282533	2.170917969	0.300808751	7.216937541	5.32E-13	3.08E-11
MSTRG.6291	833.8732182	2.012350071	0.278852954	7.216527706	5.33E-13	3.08E-11
MSTRG.23565	17994.52847	2.36709624	0.329381456	7.186489096	6.65E-13	3.80E-11
MSTRG.22164	120.6728962	-2.36909573	0.329852483	-7.182288605	6.86E-13	3.89E-11
MSTRG.24326	1125.026513	1.631634376	0.227523845	7.171267587	7.43E-13	4.18E-11
MSTRG.16033	391.4704945	-2.053998129	0.286628274	-7.166069479	7.72E-13	4.30E-11
MSTRG.5100	272.6834185	3.068576937	0.429232441	7.148986522	8.74E-13	4.83E-11
MSTRG.6916	660.7000881	2.422861644	0.339529089	7.135947185	9.61E-13	5.27E-11
MSTRG.22654	7068.667563	1.608198377	0.225669051	7.126357677	1.03E-12	5.60E-11
MSTRG.7645	4727.504027	1.466485894	0.206088663	7.115800902	1.11E-12	6.00E-11
MSTRG.4124	181.87233	-2.349156242	0.330698748	-7.103613956	1.22E-12	6.50E-11
MSTRG.2058	485.2302354	1.664485896	0.234375387	7.101794753	1.23E-12	6.54E-11
MSTRG.20020	317.8866336	-1.603796287	0.225900361	-7.099573803	1.25E-12	6.59E-11
MSTRG.6597	3956.100711	2.055698598	0.289761128	7.094459527	1.30E-12	6.79E-11
MSTRG.22657	538.469703	1.598105061	0.225704786	7.080510298	1.44E-12	7.45E-11
MSTRG.10430	27845.44537	1.832378063	0.259025866	7.074112298	1.50E-12	7.74E-11
MSTRG.5616	432.6739018	-1.611064967	0.227786829	-7.072687108	1.52E-12	7.76E-11
MSTRG.11626	378.8637467	2.470821693	0.349422026	7.071167546	1.54E-12	7.79E-11
MSTRG.18743	887.9855013	2.11676202	0.299713764	7.062611978	1.63E-12	8.22E-11
MSTRG.6011	71.42044636	-3.020122112	0.427910841	-7.057830325	1.69E-12	8.44E-11
MSTRG.4826	3346.003304	1.398695637	0.19824637	7.055340454	1.72E-12	8.53E-11
MSTRG.5645	96.54832289	-2.616580707	0.370983806	-7.053086049	1.75E-12	8.61E-11
MSTRG.5511	3610.328394	1.31735655	0.186810547	7.051831768	1.77E-12	8.62E-11
MSTRG.2573	2822.797227	1.898306726	0.269311213	7.048747458	1.81E-12	8.75E-11
MSTRG.16512	152.1434211	-2.177200698	0.309068929	-7.044385559	1.86E-12	8.90E-11
MSTRG.23894	5734.923086	1.964617751	0.278854558	7.045313387	1.85E-12	8.90E-11
MSTRG.11720	173.2706563	2.320387593	0.330036705	7.030695545	2.06E-12	9.75E-11
MSTRG.18318	369.7131143	2.493529351	0.35484888	7.027017677	2.11E-12	9.94E-11
MSTRG.21034	359.0108962	2.119489326	0.301798998	7.022850781	2.17E-12	1.02E-10
MSTRG.7053	3557.693348	1.589034897	0.226473983	7.016412566	2.28E-12	1.06E-10
MSTRG.16608	331.8923658	1.852263458	0.264505054	7.0027526	2.51E-12	1.16E-10
MSTRG.11424	182.8006707	1.87769453	0.268630173	6.989886918	2.75E-12	1.26E-10
MSTRG.6692	2257.937504	1.775522258	0.254128336	6.986715004	2.81E-12	1.28E-10
MSTRG.23784	47.11220014	-4.362183858	0.624744146	-6.982352516	2.90E-12	1.31E-10
MSTRG.24045	1666.481289	2.100455669	0.30119733	6.973686225	3.09E-12	1.39E-10
MSTRG.14255	934.4532847	-1.623250861	0.233740715	-6.944664581	3.79E-12	1.69E-10
MSTRG.8275	1523.716199	1.787487577	0.257427948	6.943642259	3.82E-12	1.69E-10
MSTRG.7477	70.0500047	5.009967985	0.722890868	6.930462407	4.19E-12	1.85E-10
MSTRG.3247	261.288817	-1.664122587	0.240239351	-6.926935899	4.30E-12	1.88E-10
MSTRG.15519	593.5311452	-1.814406004	0.262496329	-6.912119535	4.77E-12	2.07E-10
MSTRG.22289	1233.472663	-1.473811681	0.213455149	-6.90454969	5.04E-12	2.17E-10
MSTRG.17603	71.99931183	-3.116767479	0.452821922	-6.882987167	5.86E-12	2.51E-10
MSTRG.11375	11201.84925	1.827403504	0.266193517	6.864943682	6.65E-12	2.83E-10
MSTRG.21268	1951.658213	1.72043474	0.251020536	6.853760913	7.19E-12	3.05E-10
MSTRG.23903	923.3343179	2.032475156	0.296801164	6.847935255	7.49E-12	3.15E-10
MSTRG.4481	254.6235253	2.057553697	0.300701976	6.84250141	7.78E-12	3.25E-10
MSTRG.18517	427.1550085	1.462645194	0.213993636	6.834993876	8.20E-12	3.41E-10
MSTRG.630	119.1108363	2.020280547	0.296228878	6.819998642	9.10E-12	3.76E-10
MSTRG.6135	1427.438645	1.665485539	0.244259579	6.818506553	9.20E-12	3.78E-10
MSTRG.24985	1152.695207	1.871275634	0.274526033	6.816386834	9.34E-12	3.81E-10
MSTRG.15657	86.58004428	-2.378941873	0.350070238	-6.795613038	1.08E-11	4.37E-10
MSTRG.23794	533.1464261	2.487858832	0.366547155	6.787281797	1.14E-11	4.60E-10
MSTRG.24007	1075.741873	1.546024625	0.228245091	6.773528492	1.26E-11	5.03E-10
MSTRG.8722	75.69115045	-2.428621585	0.360417996	-6.738347174	1.60E-11	6.38E-10
MSTRG.5518	598.1461912	1.972601483	0.292847687	6.735929872	1.63E-11	6.45E-10
MSTRG.22536	319.8046095	2.003695649	0.298014412	6.723485738	1.77E-11	6.98E-10
MSTRG.23533	1306.024228	1.394519975	0.207479359	6.721246783	1.80E-11	7.05E-10
MSTRG.16432	18657.23162	1.413004242	0.210260272	6.720262592	1.81E-11	7.05E-10
MSTRG.19885	72.47948452	3.355118552	0.500019422	6.709976463	1.95E-11	7.53E-10
MSTRG.22786	1401.116575	1.265646108	0.189189995	6.689815203	2.23E-11	8.49E-10
MSTRG.24026	1350.052526	2.100215219	0.313921455	6.690257018	2.23E-11	8.49E-10
MSTRG.25031	13204.34984	-1.271999138	0.190123457	-6.690385075	2.23E-11	8.49E-10
MSTRG.13676	540.5225816	1.612765798	0.241558818	6.676493165	2.45E-11	9.25E-10
MSTRG.16290	65.84294474	-2.931231131	0.439159209	-6.674643442	2.48E-11	9.31E-10
MSTRG.18560	420.1615699	1.660297817	0.248832171	6.672359973	2.52E-11	9.41E-10
MSTRG.15426	792.9785394	1.788228745	0.268317014	6.664611825	2.65E-11	9.86E-10
MSTRG.12135	158.7497324	1.776909195	0.266652526	6.663762831	2.67E-11	9.86E-10
MSTRG.23186	107.517303	-2.291932749	0.344000781	-6.662580082	2.69E-11	9.89E-10
MSTRG.20937	398.3554137	1.706330923	0.25642182	6.654390513	2.84E-11	1.04E-09
MSTRG.21770	7610.703338	1.574723527	0.236650317	6.654221078	2.85E-11	1.04E-09
MSTRG.17558	123.2144584	2.223623593	0.334267427	6.652229365	2.89E-11	1.04E-09
MSTRG.19773	573.9376445	1.434792945	0.215864161	6.64673996	3.00E-11	1.08E-09
MSTRG.20919	206.621761	-1.670032376	0.251485228	-6.640677831	3.12E-11	1.12E-09
MSTRG.22814	524.1383974	2.069952293	0.312620772	6.621288398	3.56E-11	1.27E-09
MSTRG.14387	16365.54619	1.798679994	0.271910451	6.614971909	3.72E-11	1.32E-09
MSTRG.19423	183.3488991	-1.852992436	0.28032888	-6.610066131	3.84E-11	1.35E-09
MSTRG.8660	148.9034704	-2.371589752	0.36030538	-6.582165797	4.64E-11	1.62E-09
MSTRG.21859	4351.596904	2.53348899	0.385689923	6.568719681	5.07E-11	1.77E-09
MSTRG.2080	108.8238671	2.506611198	0.381778914	6.565609322	5.18E-11	1.80E-09
MSTRG.19300	783.7432451	1.847103227	0.281761624	6.555552886	5.54E-11	1.91E-09
MSTRG.17880	198.7711041	-1.703573484	0.26003497	-6.551324557	5.70E-11	1.96E-09
MSTRG.1071	588.4322841	-1.61821778	0.247236012	-6.545234934	5.94E-11	2.03E-09
MSTRG.6665	1550.035417	2.056405469	0.315360835	6.520801705	6.99E-11	2.37E-09
MSTRG.4040	185.1796768	-2.041918165	0.313337147	-6.516680786	7.19E-11	2.43E-09
MSTRG.8362	1609.104954	2.317955498	0.357813736	6.478106528	9.29E-11	3.12E-09
MSTRG.7506	4717.17438	1.397648151	0.216469314	6.456564795	1.07E-10	3.58E-09
MSTRG.19664	1085.526838	-2.045941371	0.317066469	-6.452720713	1.10E-10	3.62E-09
MSTRG.22198	5527.267276	1.512281519	0.234340575	6.453349029	1.09E-10	3.62E-09
MSTRG.22252	314.5431601	1.778887599	0.275622735	6.454066995	1.09E-10	3.62E-09
MSTRG.10303	563.0301118	-2.295686699	0.355965562	-6.44918201	1.12E-10	3.67E-09
MSTRG.1814	8479.434658	1.84706481	0.286374532	6.449822193	1.12E-10	3.67E-09
MSTRG.17188	698.8609449	1.923007748	0.298309007	6.446361663	1.15E-10	3.68E-09
MSTRG.19460	77.59998428	-2.519517007	0.390773039	-6.447520067	1.14E-10	3.68E-09
MSTRG.20372	12028.51183	1.696201004	0.263104593	6.446869604	1.14E-10	3.68E-09
MSTRG.8605	899.5479623	-1.706096311	0.264807213	-6.442786388	1.17E-10	3.75E-09
MSTRG.19882	13068.55868	-1.287581114	0.200311172	-6.427904638	1.29E-10	4.12E-09
MSTRG.18691	1077.557878	-1.548486588	0.241309394	-6.417017421	1.39E-10	4.41E-09
MSTRG.24289	334.6076245	1.760959261	0.274496974	6.415222841	1.41E-10	4.44E-09
MSTRG.24975	2631.070946	1.903561215	0.296859899	6.412321851	1.43E-10	4.50E-09
MSTRG.7841	14224.21143	1.517562437	0.236760085	6.409705585	1.46E-10	4.56E-09
MSTRG.4179	1245.577155	2.140624624	0.334673858	6.396151281	1.59E-10	4.96E-09
MSTRG.2411	175.9783834	-2.613527497	0.409079016	-6.388808501	1.67E-10	5.18E-09
MSTRG.13203	365.2632851	-1.469682727	0.230205709	-6.384214935	1.72E-10	5.31E-09
MSTRG.15369	711.5576992	1.402614498	0.219780333	6.381892666	1.75E-10	5.37E-09
MSTRG.25107	3117.060055	2.473136894	0.387626243	6.380210165	1.77E-10	5.40E-09
MSTRG.19094	1647.444704	-1.326651867	0.208028778	-6.377251656	1.80E-10	5.48E-09
MSTRG.8089	627.7072526	-1.548990541	0.243235753	-6.368268326	1.91E-10	5.79E-09
MSTRG.535	879.0644361	-1.506781515	0.236788745	-6.363400051	1.97E-10	5.95E-09
MSTRG.22018	937.9411275	1.872664667	0.294759506	6.353195168	2.11E-10	6.33E-09
MSTRG.1430	3421.840099	1.219366834	0.192128969	6.346605813	2.20E-10	6.57E-09
MSTRG.11103	485.5915621	1.533787494	0.241768423	6.344035633	2.24E-10	6.62E-09
MSTRG.20	53.01321652	-3.308469163	0.521472486	-6.344475023	2.23E-10	6.62E-09
MSTRG.17896	658.4038543	1.373739744	0.21728901	6.322177741	2.58E-10	7.60E-09
MSTRG.7006	106.060398	-2.653456208	0.419995436	-6.317821537	2.65E-10	7.78E-09
MSTRG.432	1130.214289	-1.357851545	0.214960721	-6.316742616	2.67E-10	7.80E-09
MSTRG.1792	194.7343897	1.611935515	0.255407801	6.311222705	2.77E-10	8.00E-09
MSTRG.7555	1178.523586	-1.586159597	0.251303037	-6.311740657	2.76E-10	8.00E-09
MSTRG.8180	91.01747675	-2.163817367	0.342867525	-6.310942892	2.77E-10	8.00E-09
MSTRG.24027	11296.77837	1.87395036	0.29742611	6.300557676	2.97E-10	8.51E-09
MSTRG.15633	1881.640106	1.48345114	0.235585065	6.296881086	3.04E-10	8.68E-09
MSTRG.10957	382.5262086	1.669106707	0.26543748	6.288134987	3.21E-10	9.15E-09
MSTRG.11099	462.7764182	1.534695729	0.244323085	6.281419261	3.35E-10	9.49E-09
MSTRG.18963	107.8638701	-2.107391157	0.335513696	-6.28108831	3.36E-10	9.49E-09
MSTRG.1674	1060.671359	-1.290812027	0.205598346	-6.278319118	3.42E-10	9.62E-09
MSTRG.739	811.5918194	1.716480796	0.273848509	6.267993953	3.66E-10	1.02E-08
MSTRG.4123	538.3095177	1.620780077	0.258811788	6.262388928	3.79E-10	1.06E-08
MSTRG.17261	97.97367911	2.132057433	0.341053993	6.251378003	4.07E-10	1.13E-08
MSTRG.19964	212.2496323	-1.93915422	0.310294997	-6.249389265	4.12E-10	1.14E-08
MSTRG.7826	334.2460347	1.495223745	0.239616067	6.240081323	4.37E-10	1.20E-08
MSTRG.19807	598.7095673	1.656726093	0.265665023	6.236146834	4.48E-10	1.22E-08
MSTRG.2227	618.6101307	-1.629071006	0.261181441	-6.237315329	4.45E-10	1.22E-08
MSTRG.659	125.633156	1.847634773	0.296275459	6.236205917	4.48E-10	1.22E-08
MSTRG.22025	457.0206377	1.545933025	0.24804102	6.232570012	4.59E-10	1.24E-08
MSTRG.3398	9144.464289	1.519013135	0.243742994	6.232027872	4.60E-10	1.24E-08
MSTRG.4111	347.2275358	-1.733003611	0.278116917	-6.231205309	4.63E-10	1.24E-08
MSTRG.9603	410.2429795	1.661323696	0.266586814	6.231829975	4.61E-10	1.24E-08
MSTRG.21016	4618.724871	1.272075364	0.204596871	6.217472222	5.05E-10	1.35E-08
MSTRG.22201	9006.801325	-1.506036955	0.242600819	-6.207880746	5.37E-10	1.43E-08
MSTRG.9798	1509.174153	1.602152786	0.258566271	6.196294592	5.78E-10	1.53E-08
MSTRG.13814	889.5656293	1.489599518	0.240853538	6.184669441	6.22E-10	1.64E-08
MSTRG.10368	443.0258127	1.896885539	0.307256261	6.173626974	6.67E-10	1.75E-08
MSTRG.10343	204.2635499	-1.785707308	0.289292524	-6.172670076	6.71E-10	1.75E-08
MSTRG.10040	85.27420828	-2.605424485	0.422307988	-6.169488998	6.85E-10	1.78E-08
MSTRG.24587	151.4120365	2.05565667	0.333196914	6.169494931	6.85E-10	1.78E-08
MSTRG.22666	384.5056891	1.781281101	0.289043379	6.162677404	7.15E-10	1.85E-08
MSTRG.23139	348.2301583	1.331744587	0.216302712	6.15685571	7.42E-10	1.91E-08
MSTRG.3400	724.141084	-1.637553201	0.266084926	-6.15425016	7.54E-10	1.93E-08
MSTRG.22222	614.6264932	1.538894321	0.250095659	6.153222829	7.59E-10	1.94E-08
MSTRG.9172	80.36348434	-2.326266395	0.378378347	-6.14799026	7.85E-10	2.00E-08
MSTRG.22328	523.7898974	1.474686291	0.240081191	6.142448243	8.13E-10	2.05E-08
MSTRG.24319	796.4797391	1.763833771	0.287134436	6.142884828	8.10E-10	2.05E-08
MSTRG.21579	1184.858474	-1.511408263	0.246224955	-6.138322831	8.34E-10	2.09E-08
MSTRG.9545	72.15057825	2.215541082	0.360911539	6.138737176	8.32E-10	2.09E-08
MSTRG.621	55.04660584	3.011775775	0.490752601	6.137055148	8.41E-10	2.10E-08
MSTRG.10893	473.1077999	1.4377356	0.234361357	6.13469567	8.53E-10	2.12E-08
MSTRG.23558	1168.111153	1.39350077	0.227900221	6.114521362	9.68E-10	2.40E-08
MSTRG.24255	35.34783105	3.729954711	0.610968412	6.104987812	1.03E-09	2.54E-08
MSTRG.1999	2373.535265	1.333761012	0.218661891	6.099650028	1.06E-09	2.61E-08
MSTRG.14201	1726.397677	1.890289086	0.310146872	6.09481912	1.10E-09	2.68E-08
MSTRG.14331	210.2267303	1.891833103	0.310746283	6.088031325	1.14E-09	2.78E-08
MSTRG.15585	31540.84435	-1.637694007	0.269004161	-6.087987637	1.14E-09	2.78E-08
MSTRG.7802	467.6927925	1.81977713	0.29897168	6.086787644	1.15E-09	2.79E-08
MSTRG.5051	12653.07254	1.523021424	0.250305477	6.084650823	1.17E-09	2.82E-08
MSTRG.1060	126.5033656	1.847296105	0.303764937	6.081334214	1.19E-09	2.87E-08
MSTRG.23843	153.3595634	-2.886061995	0.475492554	-6.069626052	1.28E-09	3.07E-08
MSTRG.22736	282.9333322	1.897339281	0.312907021	6.063588083	1.33E-09	3.18E-08
MSTRG.3117	70.0214125	-2.329320277	0.384330928	-6.060715147	1.36E-09	3.23E-08
MSTRG.7823	1695.112635	1.741282055	0.287590008	6.054737663	1.41E-09	3.34E-08
MSTRG.23720	841.7285879	1.514752476	0.250244063	6.053100551	1.42E-09	3.36E-08
MSTRG.20597	478.8923427	-1.29152085	0.213849461	-6.039392583	1.55E-09	3.64E-08
MSTRG.23367	322.9063409	1.466614718	0.242998633	6.035485465	1.58E-09	3.72E-08
MSTRG.7848	311.0842244	-1.345967215	0.223159629	-6.031409995	1.63E-09	3.80E-08
MSTRG.22140	518.4366824	1.629711069	0.270289998	6.02949084	1.64E-09	3.81E-08
MSTRG.3804	257.3089139	-1.741671511	0.288842712	-6.029826752	1.64E-09	3.81E-08
MSTRG.9531	32.70658352	-3.646369363	0.604654689	-6.030498781	1.63E-09	3.81E-08
MSTRG.22112	119.3781278	1.943118108	0.322332219	6.028308661	1.66E-09	3.82E-08
MSTRG.3060	1233.110482	-1.178858403	0.195594403	-6.027055899	1.67E-09	3.82E-08
MSTRG.5922	362.539112	1.73366339	0.287628828	6.027432658	1.67E-09	3.82E-08
MSTRG.8694	32591.82328	2.453221568	0.407436685	6.021111152	1.73E-09	3.95E-08
MSTRG.10422	881.4108201	1.420075039	0.23630044	6.009616561	1.86E-09	4.23E-08
MSTRG.12426	451.5883598	1.54449423	0.257190468	6.005254555	1.91E-09	4.33E-08
MSTRG.20438	2207.335322	1.534297761	0.255687453	6.000676786	1.96E-09	4.44E-08
MSTRG.10126	430.7326148	-1.75003567	0.291680683	-5.999833971	1.98E-09	4.45E-08
MSTRG.23994	507.7418371	2.038533553	0.339897393	5.997496875	2.00E-09	4.50E-08
MSTRG.15782	446.9308887	1.248682655	0.208266394	5.995603185	2.03E-09	4.54E-08
MSTRG.16453	1031.651534	1.457522255	0.243399657	5.988185336	2.12E-09	4.72E-08
MSTRG.20483	238.5000613	-1.50423279	0.251182225	-5.988611624	2.12E-09	4.72E-08
MSTRG.2021	515.5439015	-2.307202401	0.385863516	-5.979322494	2.24E-09	4.96E-08
MSTRG.3809	230.5119687	-2.103501716	0.35212159	-5.973793642	2.32E-09	5.12E-08
MSTRG.13922	227.8190877	1.939789075	0.324823064	5.971832955	2.35E-09	5.16E-08
MSTRG.22051	251.6147343	-1.373214948	0.230281779	-5.963194108	2.47E-09	5.42E-08
MSTRG.21469	144.5149543	-1.890905272	0.317716432	-5.951550131	2.66E-09	5.81E-08
MSTRG.6698	482.4728342	1.421524309	0.238895693	5.950397382	2.67E-09	5.83E-08
MSTRG.1950	368.1643843	1.83640329	0.308862833	5.945692047	2.75E-09	5.98E-08
MSTRG.5612	282.3850223	1.677240039	0.282253189	5.942324504	2.81E-09	6.08E-08
MSTRG.21002	512.6406531	1.695499446	0.285825004	5.931949339	2.99E-09	6.46E-08
MSTRG.11436	45.90376571	2.531977736	0.427075387	5.928643548	3.05E-09	6.57E-08
MSTRG.15683	636.9198428	-2.527425665	0.426345395	-5.928117652	3.06E-09	6.57E-08
MSTRG.9599	819.6739278	1.500914394	0.253296123	5.925532437	3.11E-09	6.65E-08
MSTRG.2500	181.8508682	1.640313484	0.277240898	5.916563888	3.29E-09	7.00E-08
MSTRG.22662	3992.399561	1.210663437	0.205065531	5.903788075	3.55E-09	7.54E-08
MSTRG.9247	11870.59995	1.433774811	0.242891974	5.902932017	3.57E-09	7.56E-08
MSTRG.15514	347.183831	-1.616698604	0.273993538	-5.900499031	3.62E-09	7.65E-08
MSTRG.434	797.121491	-1.37718825	0.233772336	-5.891151517	3.84E-09	8.07E-08
MSTRG.4901	3905.202392	1.243259242	0.211246107	5.8853593	3.97E-09	8.33E-08
MSTRG.20225	195.4346717	2.11912483	0.360204934	5.883108838	4.03E-09	8.42E-08
MSTRG.14239	161.2531402	1.483933102	0.252655648	5.873342283	4.27E-09	8.90E-08
MSTRG.18972	903.6368522	-1.454484983	0.24786671	-5.868012614	4.41E-09	9.16E-08
MSTRG.4940	4314.59153	-1.538298542	0.262284731	-5.864994643	4.49E-09	9.30E-08
MSTRG.15874	78.86510674	1.968673917	0.336570543	5.849216337	4.94E-09	1.02E-07
MSTRG.5713	425.3174821	1.49090394	0.255122132	5.84388319	5.10E-09	1.05E-07
MSTRG.23755	148.0587205	-1.666781276	0.28543451	-5.839452539	5.24E-09	1.07E-07
MSTRG.11749	5145.778554	1.160691313	0.198839921	5.83731529	5.30E-09	1.08E-07
MSTRG.15875	137.6844902	-1.591017517	0.272537201	-5.837799424	5.29E-09	1.08E-07
MSTRG.12261	40.79137802	4.286413215	0.734441342	5.836290757	5.34E-09	1.09E-07
MSTRG.11512	2469.745352	2.051742163	0.351791957	5.832260016	5.47E-09	1.11E-07
MSTRG.7221	4783.139656	-1.089697219	0.186891236	-5.830649101	5.52E-09	1.12E-07
MSTRG.14286	8784.704011	1.173655775	0.20132108	5.829770913	5.55E-09	1.12E-07
MSTRG.17738	547.3782092	-1.224801514	0.210261992	-5.825120866	5.71E-09	1.14E-07
MSTRG.24364	107.6898206	1.915427181	0.328806617	5.825391221	5.70E-09	1.14E-07
MSTRG.1850	889.9287144	-1.217946872	0.209287838	-5.819482311	5.90E-09	1.18E-07
MSTRG.23289	167.8783415	-2.219143853	0.381396276	-5.818472795	5.94E-09	1.18E-07
MSTRG.335	821.037253	-1.760800244	0.302643641	-5.818064575	5.95E-09	1.18E-07
MSTRG.20354	14156.68611	-1.249501166	0.214957225	-5.812789819	6.14E-09	1.22E-07
MSTRG.7176	3076.0592	1.79473947	0.309018216	5.807875959	6.33E-09	1.25E-07
MSTRG.12781	2275.601429	1.543928894	0.265948078	5.805377134	6.42E-09	1.26E-07
MSTRG.8595	2133.229374	-1.431047027	0.246796771	-5.798483598	6.69E-09	1.31E-07
MSTRG.14180	3709.984035	-1.266226907	0.218391894	-5.797957434	6.71E-09	1.31E-07
MSTRG.16856	3196.672232	1.142725119	0.19721007	5.794456234	6.85E-09	1.34E-07
MSTRG.21484	538.3321883	-1.510438697	0.260714498	-5.793458785	6.90E-09	1.34E-07
MSTRG.3131	159.049149	-1.802513765	0.31115226	-5.793028032	6.91E-09	1.34E-07
MSTRG.11799	412.2145853	1.655036286	0.286266145	5.781460078	7.41E-09	1.43E-07
MSTRG.9954	123.5887655	-2.044375127	0.353608475	-5.7814653	7.41E-09	1.43E-07
MSTRG.20644	595.4492598	1.329894429	0.230227023	5.776447998	7.63E-09	1.47E-07
MSTRG.20380	131.404384	1.748952204	0.302856983	5.774845234	7.70E-09	1.48E-07
MSTRG.11364	6481.625738	1.521849264	0.263614723	5.773005557	7.79E-09	1.49E-07
MSTRG.20867	1059.73179	1.306163151	0.22634276	5.770730871	7.89E-09	1.50E-07
MSTRG.7728	137.5224141	2.31941819	0.401948275	5.770439466	7.91E-09	1.50E-07
MSTRG.15811	164.6770388	1.787219736	0.309806117	5.768832946	7.98E-09	1.51E-07
MSTRG.11196	440.4731937	1.515685858	0.262961004	5.763918746	8.22E-09	1.55E-07
MSTRG.6588	780.4285503	1.299549872	0.225556826	5.761518711	8.34E-09	1.57E-07
MSTRG.22327	1390.611692	1.360513732	0.236363199	5.756030292	8.61E-09	1.62E-07
MSTRG.6775	77.67634784	-2.245259226	0.390103804	-5.755543025	8.64E-09	1.62E-07
MSTRG.7413	249.0992917	1.732821732	0.301596224	5.745502084	9.16E-09	1.71E-07
MSTRG.9884	70.266494	-2.606580222	0.453724116	-5.744857123	9.20E-09	1.71E-07
MSTRG.11048	2056.529778	1.054140661	0.183521755	5.743954763	9.25E-09	1.72E-07
MSTRG.14756	37539.52572	1.580761658	0.275428321	5.73928509	9.51E-09	1.76E-07
MSTRG.2906	381.4605101	1.316711036	0.229477062	5.737876485	9.59E-09	1.77E-07
MSTRG.7838	107.3037594	1.685348449	0.293909011	5.734252388	9.79E-09	1.80E-07
MSTRG.10289	29.71532691	-3.24233636	0.56560986	-5.732460821	9.90E-09	1.82E-07
MSTRG.18649	1404.338301	1.668347243	0.291355386	5.726158924	1.03E-08	1.87E-07
MSTRG.3354	2584.830598	1.399560229	0.244382201	5.726931927	1.02E-08	1.87E-07
MSTRG.8313	5194.198931	1.305960158	0.228064142	5.726284481	1.03E-08	1.87E-07
MSTRG.974	2967.155031	1.459079795	0.254769257	5.727063833	1.02E-08	1.87E-07
MSTRG.1522	1591.322156	-1.236381828	0.215952961	-5.725236747	1.03E-08	1.87E-07
MSTRG.21585	249.7562124	1.934056502	0.337980372	5.722392968	1.05E-08	1.90E-07
MSTRG.10635	14127.5116	1.599644586	0.279604904	5.721089157	1.06E-08	1.91E-07
MSTRG.15913	1868.623153	1.478559825	0.258490345	5.719980853	1.07E-08	1.92E-07
MSTRG.18000	184.9268201	-1.936844308	0.338927991	-5.714618913	1.10E-08	1.97E-07
MSTRG.7218	1729.827505	1.877965731	0.328736994	5.712669293	1.11E-08	1.99E-07
MSTRG.4287	39687.60935	1.267882099	0.222311395	5.703180879	1.18E-08	2.10E-07
MSTRG.6655	86.99216147	2.008460815	0.352186732	5.702829299	1.18E-08	2.10E-07
MSTRG.5952	584.6586035	1.504499154	0.265309436	5.670733684	1.42E-08	2.52E-07
MSTRG.17557	1994.609312	1.583988329	0.279354309	5.670176832	1.43E-08	2.52E-07
MSTRG.9325	3032.941969	-1.546687576	0.273015515	-5.665200297	1.47E-08	2.59E-07
MSTRG.24965	76.99986313	2.198755425	0.388164018	5.664500896	1.47E-08	2.60E-07
MSTRG.18336	4917.267849	1.199639081	0.211931561	5.660502276	1.51E-08	2.65E-07
MSTRG.23887	367.6218687	-1.312043808	0.231899818	-5.657804378	1.53E-08	2.68E-07
MSTRG.16164	873.9380019	-1.452257772	0.256810279	-5.654983042	1.56E-08	2.71E-07
MSTRG.17919	1084.416185	1.491092571	0.26367255	5.655092155	1.56E-08	2.71E-07
MSTRG.4497	119.0052998	-2.022152052	0.357665877	-5.653746085	1.57E-08	2.73E-07
MSTRG.14892	383.085204	1.731467809	0.306362912	5.651688699	1.59E-08	2.75E-07
MSTRG.10765	204.4714203	1.981667089	0.350959915	5.646420011	1.64E-08	2.82E-07
MSTRG.4951	5262.010092	1.604527792	0.284154086	5.646682107	1.64E-08	2.82E-07
MSTRG.22740	71.29998643	2.030469244	0.359675254	5.645284798	1.65E-08	2.84E-07
MSTRG.19177	228.7160123	-1.436466236	0.254625447	-5.641487347	1.69E-08	2.89E-07
MSTRG.8890	939.5476462	-2.189009914	0.388191948	-5.638988454	1.71E-08	2.93E-07
MSTRG.18419	787.9673472	1.192562966	0.211623261	5.635311357	1.75E-08	2.98E-07
MSTRG.214	930.5762543	1.286476983	0.228291811	5.635230533	1.75E-08	2.98E-07
MSTRG.8101	946.9729733	-2.065854579	0.367263965	-5.624985781	1.86E-08	3.15E-07
MSTRG.6797	91.85832521	1.664921314	0.296150449	5.621876711	1.89E-08	3.20E-07
MSTRG.20943	638.9200069	1.832224104	0.326209266	5.616713861	1.95E-08	3.29E-07
MSTRG.9937	750.1662337	1.300420213	0.231736413	5.611635189	2.00E-08	3.38E-07
MSTRG.25115	1791.004082	1.237561673	0.220696062	5.607538533	2.05E-08	3.45E-07
MSTRG.21087	339.166588	1.884595194	0.336682109	5.597550764	2.17E-08	3.64E-07
MSTRG.18968	506.8082182	1.514966415	0.270722134	5.596019766	2.19E-08	3.67E-07
MSTRG.2007	195.8938985	-1.821544451	0.325576309	-5.594831074	2.21E-08	3.68E-07
MSTRG.12927	847.7781255	1.703267442	0.304626757	5.591325789	2.25E-08	3.75E-07
MSTRG.11665	170.4194521	1.598681017	0.286029362	5.589219959	2.28E-08	3.79E-07
MSTRG.21688	173.9397254	-1.578271835	0.282511576	-5.586574024	2.32E-08	3.83E-07
MSTRG.1733	326.4017092	1.501444935	0.268877643	5.584119679	2.35E-08	3.88E-07
MSTRG.10794	166.245867	-1.836926621	0.329357908	-5.577296232	2.44E-08	4.02E-07
MSTRG.16531	837.738385	1.46252457	0.262302552	5.575716135	2.47E-08	4.04E-07
MSTRG.7190	2076.042648	1.127676198	0.202235236	5.576061922	2.46E-08	4.04E-07
MSTRG.14745	101.4714003	1.74717649	0.313603216	5.571296474	2.53E-08	4.14E-07
MSTRG.13099	318.8340811	1.653527984	0.296876112	5.569757603	2.55E-08	4.16E-07
MSTRG.24833	204.4295721	2.510545874	0.451197948	5.564178394	2.63E-08	4.29E-07
MSTRG.1987	242.212479	1.519955229	0.273387638	5.55970723	2.70E-08	4.39E-07
MSTRG.1980	1208.091834	1.289019353	0.232180529	5.551797823	2.83E-08	4.58E-07
MSTRG.14960	283.3467391	1.601499909	0.288549237	5.550178975	2.85E-08	4.61E-07
MSTRG.10554	169.5801284	2.516960492	0.453794469	5.546476793	2.91E-08	4.70E-07
MSTRG.1131	1567.39873	2.091780598	0.377210581	5.545392164	2.93E-08	4.72E-07
MSTRG.20668	243.046498	-1.462706582	0.264116112	-5.538119468	3.06E-08	4.90E-07
MSTRG.7708	89.94837161	-1.759107231	0.318198063	-5.528340483	3.23E-08	5.17E-07
MSTRG.11263	230.4916383	1.689548871	0.305683176	5.527124173	3.26E-08	5.20E-07
MSTRG.18720	10532.8194	-1.091413569	0.197556287	-5.52457016	3.30E-08	5.26E-07
MSTRG.1231	1490.39697	1.294292745	0.234428412	5.521057501	3.37E-08	5.35E-07
MSTRG.20634	1003.264042	1.211573887	0.219507047	5.519521608	3.40E-08	5.39E-07
MSTRG.7662	127.4936942	-1.919749131	0.347995642	-5.516589576	3.46E-08	5.47E-07
MSTRG.18142	140.6780364	-2.100352948	0.381054792	-5.511944719	3.55E-08	5.60E-07
MSTRG.1623	1212.083746	1.607948063	0.291853536	5.509434922	3.60E-08	5.67E-07
MSTRG.12840	108.9797781	2.106616641	0.382463709	5.508017073	3.63E-08	5.69E-07
MSTRG.9043	531.5082513	1.41936287	0.257693553	5.507948706	3.63E-08	5.69E-07
MSTRG.6803	709.6454518	1.462240294	0.265677896	5.503808617	3.72E-08	5.81E-07
MSTRG.10792	3775.078701	0.99616945	0.181301207	5.494554989	3.92E-08	6.11E-07
MSTRG.23006	218.8029592	-1.681923649	0.306270011	-5.491636758	3.98E-08	6.19E-07
MSTRG.43	139.8390513	-1.765061462	0.321508439	-5.489938204	4.02E-08	6.24E-07
MSTRG.5136	102.4453202	-1.880619109	0.34264345	-5.488559928	4.05E-08	6.27E-07
MSTRG.24235	148.4280293	-2.014003591	0.366973249	-5.488148244	4.06E-08	6.27E-07
MSTRG.21239	480.5242144	1.31110228	0.239022369	5.485270211	4.13E-08	6.36E-07
MSTRG.19992	203.3484783	-1.475971142	0.269136133	-5.484106227	4.16E-08	6.39E-07
MSTRG.11268	471.7161938	1.146293764	0.209133737	5.481151826	4.23E-08	6.48E-07
MSTRG.6275	68.10850868	1.930148245	0.35249438	5.475685164	4.36E-08	6.67E-07
MSTRG.5953	83.82270563	-2.129039234	0.389624609	-5.464334599	4.65E-08	7.10E-07
MSTRG.5719	714.1886713	-1.115340856	0.204261691	-5.460352616	4.75E-08	7.24E-07
MSTRG.8988	26.1402775	3.813378394	0.699678843	5.450183937	5.03E-08	7.65E-07
MSTRG.18322	129.2600259	-1.511010769	0.277437799	-5.446304632	5.14E-08	7.80E-07
MSTRG.21839	242.8350189	-1.858061617	0.341486861	-5.441092552	5.30E-08	8.01E-07
MSTRG.9287	47.07552618	2.127502536	0.391232961	5.437942982	5.39E-08	8.14E-07
MSTRG.14689	279.0398715	-1.538957294	0.283509973	-5.428229836	5.69E-08	8.56E-07
MSTRG.4303	126.7193814	1.800866372	0.331756852	5.42827183	5.69E-08	8.56E-07
MSTRG.20564	4524.598328	1.575417808	0.290519819	5.422755018	5.87E-08	8.80E-07
MSTRG.15376	277.3546135	1.544812215	0.284903108	5.422237151	5.89E-08	8.81E-07
MSTRG.8955	4485.665404	1.945097584	0.358976265	5.418457356	6.01E-08	8.98E-07
MSTRG.23400	1107.526634	-1.060612339	0.195831409	-5.415946003	6.10E-08	9.08E-07
MSTRG.3860	60.80645622	-2.540284395	0.4692218	-5.413824327	6.17E-08	9.17E-07
MSTRG.9823	9877.736545	0.955339209	0.176486628	5.413096851	6.19E-08	9.19E-07
MSTRG.9645	303.8708102	1.486712175	0.274678703	5.412549856	6.21E-08	9.19E-07
MSTRG.2251	215.3689959	-1.557701143	0.288029492	-5.408130711	6.37E-08	9.40E-07
MSTRG.7281	290.0907948	1.370652882	0.253603634	5.404705215	6.49E-08	9.56E-07
MSTRG.8361	70.84803898	-2.099476444	0.388832525	-5.39943628	6.69E-08	9.83E-07
MSTRG.14109	1955.577815	1.249651947	0.231498798	5.398092588	6.74E-08	9.88E-07
MSTRG.3134	186.6717849	1.369567382	0.253794245	5.396368941	6.80E-08	9.95E-07
MSTRG.1380	446.3803527	1.550203793	0.287334676	5.395115601	6.85E-08	1.00E-06
MSTRG.9401	3806.542012	0.983571509	0.182339001	5.39419162	6.88E-08	1.00E-06
MSTRG.24118	881.1418157	1.676222012	0.310808117	5.393108866	6.92E-08	1.01E-06
MSTRG.12270	198.1679695	2.013759453	0.373888297	5.38599221	7.20E-08	1.05E-06
MSTRG.12407	684.7821791	1.347453434	0.250264209	5.384123591	7.28E-08	1.05E-06
MSTRG.15523	514.4371412	1.911871387	0.355951757	5.371153105	7.82E-08	1.13E-06
MSTRG.18525	165.7102114	1.657018152	0.308473369	5.371673274	7.80E-08	1.13E-06
MSTRG.24474	125.1282456	-1.826747729	0.340110104	-5.371048106	7.83E-08	1.13E-06
MSTRG.12992	205.8182797	1.926461779	0.358786741	5.369378409	7.90E-08	1.13E-06
MSTRG.493	680.778305	1.804640814	0.336087086	5.36956309	7.89E-08	1.13E-06
MSTRG.326	343.3735816	-1.280897881	0.238690448	-5.366355843	8.03E-08	1.15E-06
MSTRG.19925	301.1398274	1.43072584	0.266714719	5.364255288	8.13E-08	1.16E-06
MSTRG.20331	6086.591015	1.429583335	0.266608064	5.362115883	8.23E-08	1.17E-06
MSTRG.9410	64.04069261	-2.923239108	0.545328519	-5.360510232	8.30E-08	1.18E-06
MSTRG.11314	64.34125493	-2.543493186	0.474739207	-5.357664062	8.43E-08	1.19E-06
MSTRG.13031	384.8985427	-1.33471397	0.249277708	-5.354325434	8.59E-08	1.21E-06
MSTRG.9796	614.1310284	1.048438194	0.196060682	5.347518864	8.92E-08	1.26E-06
MSTRG.22655	7461.310535	1.651331388	0.308874475	5.346286337	8.98E-08	1.26E-06
MSTRG.8043	2114.607258	1.639558097	0.307124856	5.338409012	9.38E-08	1.32E-06
MSTRG.8573	30.2839685	-2.92970972	0.548843681	-5.337967474	9.40E-08	1.32E-06
MSTRG.13286	322.032312	1.404515821	0.263421163	5.331826066	9.72E-08	1.36E-06
MSTRG.15393	11745.16601	1.050221208	0.197054351	5.329601717	9.84E-08	1.37E-06
MSTRG.9060	86.2666653	1.732746646	0.325213466	5.328028586	9.93E-08	1.38E-06
MSTRG.21917	88.91325342	-2.590964935	0.486767993	-5.322792318	1.02E-07	1.42E-06
MSTRG.8789	113.6377253	-1.83510649	0.34500023	-5.319145696	1.04E-07	1.45E-06
MSTRG.15357	241.8000595	1.55167922	0.291928091	5.315278888	1.06E-07	1.47E-06
MSTRG.7408	538.9313519	1.875053388	0.352840432	5.314168163	1.07E-07	1.48E-06
MSTRG.16096	242.9055122	-1.734189907	0.326576748	-5.310206298	1.10E-07	1.51E-06
MSTRG.23882	1015.570036	1.637435821	0.308441386	5.308742265	1.10E-07	1.52E-06
MSTRG.24527	1093.897989	1.466501222	0.276441839	5.304917764	1.13E-07	1.55E-06
MSTRG.9413	253.4643952	1.653488353	0.3118049	5.302958204	1.14E-07	1.56E-06
MSTRG.20092	766.1120139	1.411460881	0.266438318	5.297514603	1.17E-07	1.61E-06
MSTRG.8223	398.1872511	-1.614378564	0.304799059	-5.296533958	1.18E-07	1.61E-06
MSTRG.17420	330.0250704	2.091484718	0.39498935	5.295040786	1.19E-07	1.62E-06
MSTRG.5304	43.33846921	-2.515090071	0.475889948	-5.285024573	1.26E-07	1.71E-06
MSTRG.17716	136.8762623	1.562341792	0.295743925	5.282751937	1.27E-07	1.72E-06
MSTRG.22768	3401.564591	1.201884248	0.227498266	5.283047953	1.27E-07	1.72E-06
MSTRG.13740	177.7137239	1.71974596	0.325610954	5.281597381	1.28E-07	1.73E-06
MSTRG.22458	86.69616429	-2.159981278	0.409094464	-5.279908357	1.29E-07	1.74E-06
MSTRG.24422	1293.622619	-1.616101766	0.306223767	-5.277519061	1.31E-07	1.76E-06
MSTRG.2482	74.69978792	-2.4020151	0.455198534	-5.276851577	1.31E-07	1.77E-06
MSTRG.10920	35.5489098	2.606166206	0.494210633	5.273391607	1.34E-07	1.79E-06
MSTRG.6201	3715.480724	0.980229082	0.185889531	5.273180682	1.34E-07	1.79E-06
MSTRG.11723	148.8912746	-1.530016097	0.290340271	-5.269734346	1.37E-07	1.82E-06
MSTRG.9314	1658.162564	1.353742765	0.256962287	5.26825465	1.38E-07	1.84E-06
MSTRG.7478	1931.793871	1.377319348	0.261460314	5.267795059	1.38E-07	1.84E-06
MSTRG.1099	259.4994968	-1.3627813	0.258958012	-5.262557006	1.42E-07	1.89E-06
MSTRG.7397	285.0325446	1.901746403	0.36149879	5.260726886	1.43E-07	1.90E-06
MSTRG.18132	131.0033809	-1.549627478	0.294681548	-5.258651214	1.45E-07	1.92E-06
MSTRG.4051	329.8671556	1.798776115	0.342212998	5.256305642	1.47E-07	1.94E-06
MSTRG.8570	4919.135618	-1.035898465	0.197081552	-5.256191934	1.47E-07	1.94E-06
MSTRG.14801	50.19157001	-2.208667668	0.42028683	-5.255143661	1.48E-07	1.94E-06
MSTRG.17255	319.4145066	1.222940634	0.232715949	5.25507873	1.48E-07	1.94E-06
MSTRG.1709	59.15368097	-2.047258232	0.389677323	-5.253726896	1.49E-07	1.95E-06
MSTRG.5697	146.1964049	2.415936019	0.459926	5.252879854	1.50E-07	1.96E-06
MSTRG.19077	67.08888891	-1.931586016	0.367953299	-5.249541241	1.52E-07	1.99E-06
MSTRG.13081	174.1164106	-1.934107898	0.368465658	-5.24908592	1.53E-07	1.99E-06
MSTRG.17559	382.2880993	1.235790841	0.235485556	5.247841355	1.54E-07	2.00E-06
MSTRG.24850	500.6663643	-1.219798777	0.232641367	-5.243258288	1.58E-07	2.05E-06
MSTRG.7926	224.3582464	1.262773649	0.241102266	5.237502205	1.63E-07	2.11E-06
MSTRG.11525	355.3385341	1.433613022	0.273872104	5.234607693	1.65E-07	2.14E-06
MSTRG.7069	31.08638834	-2.710670897	0.517909999	-5.23386477	1.66E-07	2.14E-06
MSTRG.2959	45.943018	2.290151945	0.438174232	5.226578323	1.73E-07	2.22E-06
MSTRG.8233	241.4794946	1.458403574	0.279124099	5.224928907	1.74E-07	2.24E-06
MSTRG.11896	342.5500003	1.347574808	0.258055403	5.222036778	1.77E-07	2.27E-06
MSTRG.4157	1843.991421	-1.108496792	0.212327131	-5.220702549	1.78E-07	2.28E-06
MSTRG.22466	3030.787839	-1.168030121	0.22397538	-5.214993378	1.84E-07	2.35E-06
MSTRG.21266	549.2430448	2.019343253	0.387545928	5.21059082	1.88E-07	2.40E-06
MSTRG.7743	123.4846539	1.855685021	0.356533951	5.204791908	1.94E-07	2.47E-06
MSTRG.17941	678.6015359	1.233486261	0.237141724	5.201472953	1.98E-07	2.51E-06
MSTRG.23908	1928.949571	1.228451642	0.236198801	5.200922435	1.98E-07	2.51E-06
MSTRG.7651	689.1613893	1.087513936	0.209112859	5.20060766	1.99E-07	2.51E-06
MSTRG.611	252.4181275	1.585686674	0.304968827	5.199504118	2.00E-07	2.52E-06
MSTRG.22792	4969.24504	1.291918605	0.24867	5.195313486	2.04E-07	2.57E-06
MSTRG.20361	222.8562571	-1.366450161	0.263044468	-5.194749652	2.05E-07	2.58E-06
MSTRG.14164	63.94513939	-2.109683683	0.406370354	-5.191529508	2.09E-07	2.61E-06
MSTRG.3784	55.71509172	-2.134314618	0.411116368	-5.191509709	2.09E-07	2.61E-06
MSTRG.12158	632.2695028	1.929562957	0.371824038	5.189451893	2.11E-07	2.64E-06
MSTRG.20881	1403.523225	1.159710157	0.223490668	5.189076429	2.11E-07	2.64E-06
MSTRG.19812	202.3878536	2.034389227	0.392132787	5.188011038	2.13E-07	2.65E-06
MSTRG.8116	77.73389816	-1.813733766	0.34992573	-5.183196352	2.18E-07	2.71E-06
MSTRG.2306	119.52412	-1.702245233	0.328448383	-5.182687209	2.19E-07	2.71E-06
MSTRG.9268	1076.411788	1.260280387	0.243252961	5.180945716	2.21E-07	2.73E-06
MSTRG.22787	285.2664733	1.377627972	0.265981082	5.179420882	2.23E-07	2.75E-06
MSTRG.15306	312.137997	1.42651857	0.27565	5.175108187	2.28E-07	2.81E-06
MSTRG.21340	145.9366455	-1.781020331	0.344371827	-5.17179453	2.32E-07	2.86E-06
MSTRG.18095	313.8336509	1.669804208	0.322943963	5.170569513	2.33E-07	2.87E-06
MSTRG.15373	1353.762032	1.016028876	0.196658028	5.166475471	2.39E-07	2.93E-06
MSTRG.1502	137.476637	1.638117682	0.317477058	5.15979861	2.47E-07	3.03E-06
MSTRG.18824	774.6724957	2.744737	0.532044949	5.158844203	2.48E-07	3.04E-06
MSTRG.23511	100.3962677	2.279770651	0.442130454	5.156330286	2.52E-07	3.07E-06
MSTRG.7690	373.850447	-1.32816321	0.257625271	-5.155407333	2.53E-07	3.08E-06
MSTRG.13855	133.046734	-1.639966248	0.318292631	-5.152385226	2.57E-07	3.13E-06
MSTRG.4038	76.07674704	1.993483844	0.387076789	5.15009916	2.60E-07	3.16E-06
MSTRG.4385	180.0123429	-1.560734068	0.303248742	-5.146712415	2.65E-07	3.21E-06
MSTRG.23652	204.8796369	1.358934021	0.264119348	5.145151363	2.67E-07	3.23E-06
MSTRG.13887	14688.2105	1.09631707	0.213133362	5.1438079	2.69E-07	3.24E-06
MSTRG.22003	186.1436308	1.670564806	0.324782556	5.143640806	2.69E-07	3.24E-06
MSTRG.22151	8826.93469	1.366594836	0.265665971	5.144034187	2.69E-07	3.24E-06
MSTRG.24990	1267.332323	1.268000731	0.246741503	5.138984393	2.76E-07	3.32E-06
MSTRG.1914	562.6539976	1.668821401	0.324983518	5.135095494	2.82E-07	3.38E-06
MSTRG.20542	415.3332297	1.21286155	0.23622132	5.1344288	2.83E-07	3.39E-06
MSTRG.3019	86.81319428	-1.721765985	0.335374908	-5.133854509	2.84E-07	3.39E-06
MSTRG.21112	81.90517522	2.111340473	0.411555353	5.130149465	2.90E-07	3.45E-06
MSTRG.9775	1148.804609	1.207737049	0.235529141	5.127760586	2.93E-07	3.49E-06
MSTRG.11009	127.8362901	1.694561483	0.330537465	5.126685059	2.95E-07	3.50E-06
MSTRG.9475	172.6347458	1.694179625	0.330518068	5.125830589	2.96E-07	3.51E-06
MSTRG.2467	52.41535115	2.68993282	0.525019707	5.123489238	3.00E-07	3.55E-06
MSTRG.821	1207.761767	1.546101851	0.302146961	5.117052469	3.10E-07	3.67E-06
MSTRG.13221	41.36335642	-2.565051927	0.501658469	-5.113143876	3.17E-07	3.74E-06
MSTRG.18767	255.668516	1.357368788	0.265567999	5.111191087	3.20E-07	3.77E-06
MSTRG.7023	562.5001427	-1.237138354	0.242415675	-5.103376071	3.34E-07	3.92E-06
MSTRG.19967	32.07117151	-2.694293795	0.528184058	-5.10105096	3.38E-07	3.96E-06
MSTRG.14718	81.44776213	1.635694071	0.321100574	5.094024131	3.51E-07	4.11E-06
MSTRG.627	138.9842145	-1.44314874	0.283565177	-5.089301707	3.59E-07	4.20E-06
MSTRG.21462	96.67504134	1.589288605	0.312421126	5.087007478	3.64E-07	4.25E-06
MSTRG.12263	160.48532	1.287813638	0.253185645	5.086440173	3.65E-07	4.25E-06
MSTRG.15691	920.879516	-0.968310515	0.190474372	-5.083678735	3.70E-07	4.31E-06
MSTRG.3981	44.41825567	-2.132603981	0.4196367	-5.082024483	3.73E-07	4.34E-06
MSTRG.15301	21.118012	-3.932066964	0.774001394	-5.080180724	3.77E-07	4.37E-06
MSTRG.19010	60.95162194	-2.313562336	0.45555263	-5.07858409	3.80E-07	4.40E-06
MSTRG.11021	328.9456869	1.304834733	0.256985075	5.077472817	3.82E-07	4.42E-06
MSTRG.300	1586.953092	-1.242104696	0.244765447	-5.074673368	3.88E-07	4.48E-06
MSTRG.20187	109.4086133	1.629722678	0.321178989	5.074188332	3.89E-07	4.48E-06
MSTRG.12374	1574.792305	1.03921888	0.205233334	5.063596921	4.11E-07	4.73E-06
MSTRG.6697	281.6216979	1.674415442	0.330713665	5.063036752	4.13E-07	4.73E-06
MSTRG.22482	208.8363464	1.64114555	0.324337064	5.060000017	4.19E-07	4.80E-06
MSTRG.23610	80.99594951	-2.396723812	0.473916437	-5.057270915	4.25E-07	4.86E-06
MSTRG.3703	1005.63192	1.223583357	0.242018416	5.05574483	4.29E-07	4.89E-06
MSTRG.11780	390.2895594	2.619251622	0.518450489	5.052076675	4.37E-07	4.98E-06
MSTRG.320	1826.34075	0.921248236	0.1824098	5.050431689	4.41E-07	5.01E-06
MSTRG.14591	36.58528517	-2.396786554	0.474846265	-5.047500062	4.48E-07	5.07E-06
MSTRG.18811	331.5975162	-1.333778517	0.26422977	-5.047798057	4.47E-07	5.07E-06
MSTRG.19500	129.5546858	-1.720660436	0.340881291	-5.047682229	4.47E-07	5.07E-06
MSTRG.17399	599.4119654	-1.705586956	0.338000347	-5.046110078	4.51E-07	5.08E-06
MSTRG.19826	44.88104647	-2.059254901	0.408069917	-5.046328626	4.50E-07	5.08E-06
MSTRG.3528	435.6504136	1.142641988	0.226429805	5.046340912	4.50E-07	5.08E-06
MSTRG.1941	212.8301688	-1.558491116	0.309172941	-5.040839319	4.63E-07	5.21E-06
MSTRG.7133	64.83497223	-2.549929189	0.505899041	-5.04039143	4.65E-07	5.21E-06
MSTRG.3212	32.89848844	-2.565776533	0.509361803	-5.03723781	4.72E-07	5.29E-06
MSTRG.10487	105.0171127	2.190655395	0.434945982	5.036614855	4.74E-07	5.30E-06
MSTRG.21883	132.1464246	1.475040649	0.29305803	5.033271561	4.82E-07	5.38E-06
MSTRG.15226	85.77806227	2.186654659	0.434596215	5.031462734	4.87E-07	5.43E-06
MSTRG.3634	600.4491353	1.176820925	0.233908522	5.031116085	4.88E-07	5.43E-06
MSTRG.7105	1686.325884	1.065023087	0.211749045	5.029647656	4.91E-07	5.46E-06
MSTRG.25128	126.6523042	2.049531655	0.407755212	5.026377579	5.00E-07	5.54E-06
MSTRG.15894	291.1386057	-1.365153346	0.27166938	-5.025054146	5.03E-07	5.57E-06
MSTRG.25061	178.3549001	1.306053931	0.260129812	5.020777603	5.15E-07	5.69E-06
MSTRG.5628	49.00635292	-2.102663804	0.418966137	-5.018696305	5.20E-07	5.74E-06
MSTRG.3320	408.1151186	-1.256441979	0.250557546	-5.014584473	5.31E-07	5.86E-06
MSTRG.9381	177.7726851	1.89217918	0.377552038	5.011704318	5.40E-07	5.94E-06
MSTRG.18741	1330.292969	1.075696981	0.214729396	5.009546908	5.46E-07	5.99E-06
MSTRG.8541	56.36374481	1.860772806	0.371616448	5.007240174	5.52E-07	6.05E-06
MSTRG.14520	632.9310137	-1.79493044	0.358926436	-5.000830978	5.71E-07	6.25E-06
MSTRG.1844	2452.37302	1.89186274	0.378396802	4.999679516	5.74E-07	6.28E-06
MSTRG.7118	235.8164765	-1.719184632	0.343886846	-4.999274179	5.75E-07	6.28E-06
MSTRG.12632	150.9651131	1.914838322	0.383064374	4.998737683	5.77E-07	6.29E-06
MSTRG.24408	557.2863977	1.126313662	0.225529098	4.994094647	5.91E-07	6.43E-06
MSTRG.24684	194.9073963	1.467031265	0.293865077	4.992193286	5.97E-07	6.47E-06
MSTRG.6277	161.5984434	1.732157788	0.346965744	4.992302026	5.97E-07	6.47E-06
MSTRG.22678	168.6330079	1.837007262	0.368049944	4.991190171	6.00E-07	6.50E-06
MSTRG.4606	2238.78345	1.054709391	0.211597916	4.984497997	6.21E-07	6.71E-06
MSTRG.12635	31.95230491	-2.946039368	0.591594515	-4.979828743	6.36E-07	6.87E-06
MSTRG.6586	47.16920158	-2.213651096	0.444640504	-4.978518777	6.41E-07	6.90E-06
MSTRG.7868	182.5559368	-1.269757383	0.255523567	-4.969237861	6.72E-07	7.23E-06
MSTRG.23446	58.11647137	-1.940907529	0.390642819	-4.968496624	6.75E-07	7.24E-06
MSTRG.21963	1095.00036	-1.349106805	0.271820242	-4.963231556	6.93E-07	7.43E-06
MSTRG.13878	668.5339502	1.555843795	0.313520546	4.962493902	6.96E-07	7.45E-06
MSTRG.15680	191.6770207	-1.5034867	0.303142609	-4.959668018	7.06E-07	7.55E-06
MSTRG.20496	579.1755494	1.082928682	0.218424327	4.957912417	7.13E-07	7.60E-06
MSTRG.2052	90.86210729	-1.611906097	0.325163757	-4.957213286	7.15E-07	7.62E-06
MSTRG.3293	279.5966696	-1.715449401	0.346164942	-4.955583863	7.21E-07	7.67E-06
MSTRG.2659	36.97978536	-2.366343581	0.477709012	-4.953525098	7.29E-07	7.74E-06
MSTRG.16906	915.4643477	1.054754157	0.213092078	4.949757709	7.43E-07	7.88E-06
MSTRG.12897	248.2692247	1.471671837	0.297359609	4.949131598	7.45E-07	7.89E-06
MSTRG.10990	1195.987346	1.140135647	0.230493413	4.946499904	7.56E-07	7.98E-06
MSTRG.711	267.018011	-1.178203415	0.238269139	-4.944842713	7.62E-07	8.04E-06
MSTRG.23803	65.8543644	-1.917257206	0.388325805	-4.937238731	7.92E-07	8.35E-06
MSTRG.5053	1319.791468	1.302871456	0.264266995	4.930133083	8.22E-07	8.64E-06
MSTRG.16789	1049.904607	1.844511668	0.374169791	4.929611397	8.24E-07	8.65E-06
MSTRG.24890	548.5734976	1.304327802	0.264603158	4.929373521	8.25E-07	8.65E-06
MSTRG.15565	349.1690872	1.452002877	0.294698993	4.927071048	8.35E-07	8.74E-06
MSTRG.20039	580.9732056	1.195441861	0.242885026	4.921842569	8.57E-07	8.96E-06
MSTRG.1300	44.14688832	1.987380295	0.403834843	4.921269991	8.60E-07	8.97E-06
MSTRG.1793	225.5883929	1.731530392	0.352010148	4.918978625	8.70E-07	9.06E-06
MSTRG.964	84.74253592	1.604956334	0.32637106	4.917581645	8.76E-07	9.11E-06
MSTRG.2695	171.4223297	-1.557702412	0.316826821	-4.916573695	8.81E-07	9.15E-06
MSTRG.8083	110.1918168	-1.850278774	0.376886652	-4.909377296	9.14E-07	9.48E-06
MSTRG.6476	294.0170088	-1.387670009	0.282711487	-4.908431654	9.18E-07	9.51E-06
MSTRG.9394	2244.873786	1.028133842	0.209613865	4.904894252	9.35E-07	9.66E-06
MSTRG.13774	704.9750588	-1.093880204	0.223039515	-4.904423355	9.37E-07	9.67E-06
MSTRG.10431	137.7569971	1.565448422	0.319244525	4.903603038	9.41E-07	9.70E-06
MSTRG.12245	1393.569273	0.930494777	0.18986313	4.900871365	9.54E-07	9.82E-06
MSTRG.16759	148.2708151	1.418942521	0.289572342	4.900131383	9.58E-07	9.84E-06
MSTRG.23262	626.7247474	1.257742886	0.256807124	4.897616808	9.70E-07	9.95E-06
MSTRG.11790	3226.750174	1.45414415	0.296949787	4.896936164	9.73E-07	9.97E-06
MSTRG.11022	196.4104568	-1.387072234	0.283308847	-4.895972187	9.78E-07	1.00E-05
MSTRG.10383	3125.091137	1.389534242	0.283830728	4.895644139	9.80E-07	1.00E-05
MSTRG.14304	137.9407422	-1.505233735	0.307516384	-4.894808264	9.84E-07	1.00E-05
MSTRG.15095	92.28067075	-1.458980949	0.298103732	-4.894205577	9.87E-07	1.00E-05
MSTRG.25116	79.72508774	-1.996295627	0.407980688	-4.893113042	9.93E-07	1.01E-05
MSTRG.3953	49.49628603	-1.978730357	0.404509972	-4.891672625	1.00E-06	1.01E-05
MSTRG.20568	367.6989405	1.539952852	0.315032146	4.888240367	1.02E-06	1.03E-05
MSTRG.22869	41.10443175	-2.145878571	0.439311413	-4.884641075	1.04E-06	1.05E-05
MSTRG.3843	144.101957	-1.521013548	0.311403077	-4.884388305	1.04E-06	1.05E-05
MSTRG.18657	125.7220558	1.379840303	0.282559908	4.883354872	1.04E-06	1.05E-05
MSTRG.22183	1295.924711	1.202354179	0.246245538	4.882745031	1.05E-06	1.05E-05
MSTRG.15073	134.5482355	1.84585771	0.378151367	4.881266798	1.05E-06	1.06E-05
MSTRG.15256	208.7155057	1.534365144	0.314553544	4.877914023	1.07E-06	1.08E-05
MSTRG.23936	87.68316172	2.134213688	0.437595037	4.877143262	1.08E-06	1.08E-05
MSTRG.7745	194.6486272	1.524869328	0.312814325	4.874678704	1.09E-06	1.09E-05
MSTRG.11444	2200.135469	1.342729895	0.275840545	4.867775681	1.13E-06	1.13E-05
MSTRG.24087	30.0050096	-2.850239625	0.585716146	-4.866247319	1.14E-06	1.14E-05
MSTRG.17709	2038.678727	1.152838209	0.237010738	4.864075854	1.15E-06	1.15E-05
MSTRG.11402	88.52968852	-1.791406027	0.368444692	-4.862075823	1.16E-06	1.16E-05
MSTRG.17124	186.4104158	1.577923387	0.32464519	4.860455151	1.17E-06	1.16E-05
MSTRG.19603	60.31234152	1.689517279	0.347628238	4.8601267	1.17E-06	1.16E-05
MSTRG.14000	40.61733861	-2.84780106	0.585999479	-4.859733094	1.18E-06	1.16E-05
MSTRG.7251	68.48922081	-2.191073869	0.450968964	-4.858591265	1.18E-06	1.17E-05
MSTRG.22918	7905.600028	1.387834633	0.285839209	4.855298318	1.20E-06	1.19E-05
MSTRG.4633	74.68864065	2.366438176	0.487691933	4.852321759	1.22E-06	1.20E-05
MSTRG.19085	212.4890743	1.763186453	0.36356166	4.849759052	1.24E-06	1.22E-05
MSTRG.19303	27.80247259	-3.065400983	0.632202622	-4.848763479	1.24E-06	1.22E-05
MSTRG.22816	15819.17845	1.34162083	0.276894461	4.845242574	1.26E-06	1.24E-05
MSTRG.17227	394.0151425	1.43040836	0.295304753	4.843837914	1.27E-06	1.25E-05
MSTRG.7027	96.92760359	-1.589009486	0.328121034	-4.842754116	1.28E-06	1.25E-05
MSTRG.2575	15.60514082	4.073025189	0.841426977	4.840616356	1.29E-06	1.27E-05
MSTRG.8145	151.0465991	1.692238262	0.349639677	4.839949161	1.30E-06	1.27E-05
MSTRG.10541	7255.902803	-1.151067211	0.237903516	-4.8383783	1.31E-06	1.28E-05
MSTRG.2157	68.75642672	-1.751172532	0.362063716	-4.836641876	1.32E-06	1.29E-05
MSTRG.12869	120.1855648	1.512943874	0.313003633	4.833630391	1.34E-06	1.30E-05
MSTRG.15670	32.93461856	2.529011295	0.523495219	4.831011258	1.36E-06	1.32E-05
MSTRG.8425	6766.838248	1.745881083	0.361649864	4.827545248	1.38E-06	1.34E-05
MSTRG.6363	467.9005864	-1.241687945	0.257315203	-4.825552201	1.40E-06	1.35E-05
MSTRG.11541	28.12702269	-2.743134643	0.568502224	-4.825195976	1.40E-06	1.35E-05
MSTRG.24893	268.7168235	1.224763926	0.254394626	4.814425301	1.48E-06	1.42E-05
MSTRG.11161	170.7459817	1.450526613	0.301635809	4.808867413	1.52E-06	1.46E-05
MSTRG.1728	103.7155436	-1.946331632	0.404758491	-4.80862459	1.52E-06	1.46E-05
MSTRG.6679	107.4560194	-1.581804602	0.3289795	-4.808216326	1.52E-06	1.46E-05
MSTRG.8285	1270.068892	0.888690744	0.184853089	4.807551496	1.53E-06	1.47E-05
MSTRG.22802	515.7871807	1.143543647	0.238011538	4.804572317	1.55E-06	1.49E-05
MSTRG.24981	130.9789322	1.618806979	0.337229539	4.800311932	1.58E-06	1.52E-05
MSTRG.22108	2957.15835	1.725599898	0.359545516	4.799392075	1.59E-06	1.52E-05
MSTRG.19184	73.45128494	-1.852092611	0.386277413	-4.79472148	1.63E-06	1.55E-05
MSTRG.4869	74.73115512	1.629942798	0.340240379	4.790562493	1.66E-06	1.58E-05
MSTRG.25003	221.4327017	1.553966671	0.324548795	4.788083318	1.68E-06	1.60E-05
MSTRG.10032	462.2472477	-1.660414762	0.346826763	-4.787447047	1.69E-06	1.60E-05
MSTRG.7088	427.2503293	1.93888541	0.405149122	4.785609313	1.70E-06	1.62E-05
MSTRG.15522	289.6241774	1.360013063	0.284205244	4.785320089	1.71E-06	1.62E-05
MSTRG.7123	1614.135085	1.559568551	0.325945771	4.784748531	1.71E-06	1.62E-05
MSTRG.954	272.9067492	-1.272383652	0.266249073	-4.778922382	1.76E-06	1.67E-05
MSTRG.11814	30.39386724	-3.002077106	0.628691856	-4.775116902	1.80E-06	1.69E-05
MSTRG.20626	34.61396551	2.178981986	0.456313797	4.775183221	1.80E-06	1.69E-05
MSTRG.2230	272.4842015	-1.891276101	0.396047213	-4.775380407	1.79E-06	1.69E-05
MSTRG.20160	505.3535862	-1.224081395	0.256639631	-4.769650692	1.85E-06	1.73E-05
MSTRG.8034	513.5846698	1.155580455	0.242322144	4.768777769	1.85E-06	1.74E-05
MSTRG.5157	1485.961304	1.299767039	0.272630473	4.767504625	1.87E-06	1.75E-05
MSTRG.11100	61.04329958	-1.772017569	0.371788681	-4.766195583	1.88E-06	1.76E-05
MSTRG.161	37.67521009	-2.237319319	0.469511517	-4.765206473	1.89E-06	1.76E-05
MSTRG.1781	176.121221	1.360922802	0.285642907	4.764420088	1.89E-06	1.77E-05
MSTRG.13913	299.7867664	1.368071297	0.287167275	4.764022286	1.90E-06	1.77E-05
MSTRG.20586	866.0605356	1.140686711	0.239605458	4.760687501	1.93E-06	1.79E-05
MSTRG.19660	217.2252504	1.478446143	0.310689687	4.758594198	1.95E-06	1.81E-05
MSTRG.17191	898.3430625	1.700650332	0.357547684	4.756429445	1.97E-06	1.83E-05
MSTRG.3322	103.1425029	-1.518727054	0.319465435	-4.75396362	1.99E-06	1.85E-05
MSTRG.7687	191.3126633	-1.259365318	0.264961224	-4.753017431	2.00E-06	1.85E-05
MSTRG.20163	94.59205597	1.921443981	0.404523166	4.749898503	2.04E-06	1.88E-05
MSTRG.10934	884.5009305	1.539623562	0.324335279	4.747012312	2.06E-06	1.90E-05
MSTRG.7719	50.22825029	-2.192118289	0.461832505	-4.746565612	2.07E-06	1.91E-05
MSTRG.2216	151.8815555	-1.529062585	0.322302474	-4.74418507	2.09E-06	1.93E-05
MSTRG.8715	40.1135986	-2.722149659	0.573948482	-4.742846695	2.11E-06	1.94E-05
MSTRG.25162	154.0819665	1.493468544	0.31501903	4.740883566	2.13E-06	1.95E-05
MSTRG.4626	17493.0866	1.229250676	0.259382444	4.739143703	2.15E-06	1.97E-05
MSTRG.5346	2215.280222	1.402554165	0.296058508	4.737422259	2.16E-06	1.98E-05
MSTRG.1511	96.15215573	-2.102879631	0.443933148	-4.736928617	2.17E-06	1.98E-05
MSTRG.22020	26.73372065	-3.345503392	0.706458689	-4.73559664	2.18E-06	1.99E-05
MSTRG.22207	111.7356731	-1.467477943	0.309892663	-4.735439449	2.19E-06	1.99E-05
MSTRG.11406	819.5774814	-1.66914432	0.352857967	-4.730357473	2.24E-06	2.04E-05
MSTRG.6437	222.025744	1.427842378	0.301905172	4.729439932	2.25E-06	2.05E-05
MSTRG.17408	404.6026126	1.129062836	0.23899206	4.724269243	2.31E-06	2.10E-05
MSTRG.11900	1909.43346	1.380555013	0.292484719	4.720092788	2.36E-06	2.14E-05
MSTRG.24592	22.36578815	-3.070486452	0.650691259	-4.718806977	2.37E-06	2.15E-05
MSTRG.12511	643.5761908	1.353855344	0.287078148	4.715981883	2.41E-06	2.17E-05
MSTRG.14285	229.84882	-1.643053618	0.348475056	-4.714981997	2.42E-06	2.18E-05
MSTRG.16552	571.1939289	-0.955916388	0.202754407	-4.71465158	2.42E-06	2.18E-05
MSTRG.1848	1745.430653	1.675804712	0.355757134	4.710530164	2.47E-06	2.22E-05
MSTRG.22448	423.1171932	-1.22085451	0.259186125	-4.710338998	2.47E-06	2.22E-05
MSTRG.7205	69.1690864	1.922547701	0.408501385	4.706343163	2.52E-06	2.26E-05
MSTRG.1823	4323.413762	1.486743329	0.315932396	4.705890711	2.53E-06	2.27E-05
MSTRG.12227	235.7817366	-1.468988892	0.31220665	-4.705181308	2.54E-06	2.27E-05
MSTRG.23791	57.10487027	-1.857576572	0.39488128	-4.704139358	2.55E-06	2.28E-05
MSTRG.21943	135.4072985	-1.475391851	0.313727114	-4.702787188	2.57E-06	2.29E-05
MSTRG.12136	4978.795228	0.901113374	0.191815144	4.697821845	2.63E-06	2.34E-05
MSTRG.21754	50.23992357	2.05542274	0.437509618	4.698005837	2.63E-06	2.34E-05
MSTRG.6686	198.2324619	1.177959205	0.250849807	4.695874476	2.65E-06	2.36E-05
MSTRG.14570	152.2514375	1.371454021	0.292182981	4.69381898	2.68E-06	2.38E-05
MSTRG.22839	116.350067	1.870517396	0.398598892	4.692731049	2.70E-06	2.39E-05
MSTRG.20215	283.3951962	1.181412347	0.25181539	4.691581186	2.71E-06	2.40E-05
MSTRG.20476	1480.59742	1.173670643	0.250328704	4.688518042	2.75E-06	2.43E-05
MSTRG.23357	21.50983181	-3.544428539	0.756156313	-4.687428349	2.77E-06	2.44E-05
MSTRG.6044	51.22302374	-1.916192342	0.408814898	-4.687188138	2.77E-06	2.44E-05
MSTRG.13892	56.30707785	1.74913996	0.373210187	4.686742266	2.78E-06	2.45E-05
MSTRG.12755	200.4716493	1.388440941	0.296462832	4.683355861	2.82E-06	2.48E-05
MSTRG.18003	296.4481437	-1.179106931	0.251763713	-4.683387115	2.82E-06	2.48E-05
MSTRG.1410	296.5907141	1.542667353	0.329585641	4.680626703	2.86E-06	2.51E-05
MSTRG.22166	62.33771121	1.655746163	0.353726777	4.680861811	2.86E-06	2.51E-05
MSTRG.8001	144.79621	1.57810131	0.337211688	4.679853534	2.87E-06	2.51E-05
MSTRG.15756	59.77594619	2.293707663	0.490155634	4.679549727	2.88E-06	2.51E-05
MSTRG.12852	553.0679859	1.177711217	0.251782683	4.67749094	2.90E-06	2.53E-05
MSTRG.15986	951.6857904	1.101042309	0.235397237	4.677379926	2.91E-06	2.53E-05
MSTRG.13538	1063.063616	1.233312668	0.263707686	4.676817292	2.91E-06	2.54E-05
MSTRG.13575	6047.46168	1.056948184	0.226017093	4.67640818	2.92E-06	2.54E-05
MSTRG.9968	1495.883699	-1.131690832	0.24200607	-4.676291101	2.92E-06	2.54E-05
MSTRG.23114	14255.75674	1.122077849	0.240015014	4.675031915	2.94E-06	2.55E-05
MSTRG.19337	102.2292912	2.11366855	0.452186625	4.674327885	2.95E-06	2.56E-05
MSTRG.15333	94.87909743	1.544271416	0.330403778	4.673891521	2.96E-06	2.56E-05
MSTRG.20696	156.7460823	1.689511688	0.362036152	4.666693314	3.06E-06	2.65E-05
MSTRG.15878	189.2408789	-1.74785123	0.374604884	-4.665852751	3.07E-06	2.65E-05
MSTRG.16913	17075.14362	-2.16739856	0.464578958	-4.665296444	3.08E-06	2.66E-05
MSTRG.19905	71.28121382	-1.721989854	0.369179502	-4.664370165	3.10E-06	2.66E-05
MSTRG.4660	48.63756373	-2.064805256	0.442660568	-4.66453397	3.09E-06	2.66E-05
MSTRG.20561	25.77694685	2.915104475	0.625513312	4.660339627	3.16E-06	2.71E-05
MSTRG.19192	208.216502	-1.245434423	0.267351687	-4.658412428	3.19E-06	2.73E-05
MSTRG.7508	1777.695828	1.188316383	0.255079764	4.658607038	3.18E-06	2.73E-05
MSTRG.23586	170.4053341	1.803393205	0.38771636	4.651320889	3.30E-06	2.82E-05
MSTRG.7374	1623.694069	1.125957446	0.242128688	4.650243863	3.32E-06	2.83E-05
MSTRG.3434	266.6401393	1.42694801	0.306895836	4.64961671	3.33E-06	2.84E-05
MSTRG.1847	392.8986299	1.293685323	0.27831348	4.648302783	3.35E-06	2.85E-05
MSTRG.15071	106.490212	-1.490196797	0.320674058	-4.647076246	3.37E-06	2.87E-05
MSTRG.12030	349.9491818	1.427696415	0.307263683	4.646486043	3.38E-06	2.87E-05
MSTRG.19552	151.0461199	-1.575716134	0.339173593	-4.645751221	3.39E-06	2.88E-05
MSTRG.19167	2871.24961	1.141963947	0.246409981	4.634406219	3.58E-06	3.03E-05
MSTRG.14622	457.7220552	1.099568378	0.237453714	4.63066406	3.64E-06	3.09E-05
MSTRG.5042	90.85005077	-1.917248822	0.414841039	-4.621646948	3.81E-06	3.22E-05
MSTRG.14294	39.59018322	-2.230369031	0.48272454	-4.62037631	3.83E-06	3.23E-05
MSTRG.6019	108.3268654	2.331134305	0.504584797	4.619905945	3.84E-06	3.23E-05
MSTRG.7798	4624.946532	1.181509442	0.255737294	4.6200123	3.84E-06	3.23E-05
MSTRG.9200	521.232426	2.107857168	0.456479829	4.617634858	3.88E-06	3.27E-05
MSTRG.16837	33.85594901	-2.673789377	0.579147086	-4.616770837	3.90E-06	3.28E-05
MSTRG.22996	229.6398198	1.401721913	0.303673105	4.615890876	3.91E-06	3.29E-05
MSTRG.4297	89.41888902	1.842621347	0.399494813	4.612378656	3.98E-06	3.34E-05
MSTRG.11064	110.2045991	1.737908333	0.376852542	4.611640206	4.00E-06	3.34E-05
MSTRG.18892	740.5433425	1.831354112	0.397220844	4.610417956	4.02E-06	3.36E-05
MSTRG.19162	519.2823647	1.878084573	0.40738805	4.61006299	4.03E-06	3.36E-05
MSTRG.17257	124.2494772	1.356951644	0.294441561	4.608560154	4.05E-06	3.38E-05
MSTRG.10578	210.3275442	1.445691864	0.313731811	4.608049969	4.06E-06	3.39E-05
MSTRG.21064	142.7322656	1.314876688	0.285390114	4.607295847	4.08E-06	3.39E-05
MSTRG.1440	46.56556177	1.989514754	0.431846163	4.606998803	4.09E-06	3.39E-05
MSTRG.9585	97.13785289	-1.498994235	0.325460493	-4.605764043	4.11E-06	3.41E-05
MSTRG.24402	834.4846097	1.029197312	0.223527129	4.604350779	4.14E-06	3.43E-05
MSTRG.24607	74.27613846	-1.529356003	0.332233047	-4.603262729	4.16E-06	3.44E-05
MSTRG.17212	20660.07024	1.170741376	0.254514605	4.599898601	4.23E-06	3.49E-05
MSTRG.1708	137.4198106	1.427023769	0.310474099	4.596273165	4.30E-06	3.55E-05
MSTRG.14813	41.65382041	-2.148579377	0.467540007	-4.595498446	4.32E-06	3.56E-05
MSTRG.20130	1193.30641	-1.708286117	0.371799862	-4.594638915	4.33E-06	3.57E-05
MSTRG.9757	43.78242133	-2.603349737	0.566679013	-4.594046497	4.35E-06	3.58E-05
MSTRG.10287	1013.560902	1.113654032	0.242548209	4.59147498	4.40E-06	3.61E-05
MSTRG.5732	286.516295	1.193623618	0.259961477	4.591540374	4.40E-06	3.61E-05
MSTRG.15604	946.7073654	1.337484684	0.291357391	4.590529444	4.42E-06	3.62E-05
MSTRG.1767	308.1272017	1.053794631	0.229767007	4.586361833	4.51E-06	3.69E-05
MSTRG.14093	30.73525136	-2.626720856	0.57303955	-4.583838679	4.57E-06	3.73E-05
MSTRG.21223	229.2656176	1.346770265	0.293879411	4.582730925	4.59E-06	3.75E-05
MSTRG.18944	435.1916896	-1.26038095	0.275218899	-4.579558141	4.66E-06	3.80E-05
MSTRG.2616	150.0297053	1.421421585	0.310604364	4.576309128	4.73E-06	3.86E-05
MSTRG.23961	482.5056621	1.063826691	0.23248139	4.575964956	4.74E-06	3.86E-05
MSTRG.10106	372.1112743	1.052329702	0.230024349	4.574862221	4.77E-06	3.87E-05
MSTRG.11324	2952.217393	1.682209081	0.368003587	4.571175777	4.85E-06	3.94E-05
MSTRG.638	136.0179408	-1.590199825	0.347950721	-4.570186889	4.87E-06	3.95E-05
MSTRG.17429	538.8337537	-1.491617787	0.327064569	-4.560621754	5.10E-06	4.13E-05
MSTRG.21840	4206.059076	1.338948808	0.293638717	4.559851031	5.12E-06	4.14E-05
MSTRG.16410	69.03961161	1.862196872	0.408576352	4.557769589	5.17E-06	4.18E-05
MSTRG.7450	317.6579621	-1.068117745	0.234375812	-4.557286596	5.18E-06	4.18E-05
MSTRG.1553	85.61856888	-2.095933072	0.46043983	-4.552023819	5.31E-06	4.28E-05
MSTRG.6287	917.1040714	0.884499426	0.194342442	4.55124169	5.33E-06	4.29E-05
MSTRG.13828	4586.627369	-0.935005408	0.20548528	-4.550230604	5.36E-06	4.31E-05
MSTRG.6667	78.17549508	1.959204338	0.430602994	4.549908769	5.37E-06	4.31E-05
MSTRG.9880	601.4225429	-1.271237756	0.279585171	-4.546871172	5.44E-06	4.37E-05
MSTRG.23653	426.8464091	1.219424735	0.26830371	4.544941759	5.50E-06	4.40E-05
MSTRG.12308	44.02081592	-1.88163541	0.414292641	-4.541802634	5.58E-06	4.46E-05
MSTRG.17563	152.1657538	1.463713872	0.322769458	4.534858655	5.76E-06	4.61E-05
MSTRG.12300	27.64971509	-2.351046898	0.518507566	-4.534257652	5.78E-06	4.61E-05
MSTRG.15735	720.1964169	0.999266164	0.220385851	4.534166598	5.78E-06	4.61E-05
MSTRG.21855	5045.550857	1.389164335	0.306459225	4.532949969	5.82E-06	4.63E-05
MSTRG.11743	46.38891422	-1.787778941	0.394444713	-4.532394226	5.83E-06	4.64E-05
MSTRG.13765	322.1800783	1.452036352	0.320397181	4.531988533	5.84E-06	4.64E-05
MSTRG.23384	71.1886992	1.635071412	0.360976224	4.52958202	5.91E-06	4.69E-05
MSTRG.21959	11708.7176	1.244089583	0.275391246	4.517534959	6.26E-06	4.96E-05
MSTRG.22660	129.8507186	1.394541618	0.308907903	4.514425185	6.35E-06	5.03E-05
MSTRG.16551	126.4290753	-1.377215984	0.305140144	-4.513388387	6.38E-06	5.04E-05
MSTRG.20027	65.3810647	1.832912836	0.40669445	4.5068548	6.58E-06	5.20E-05
MSTRG.25091	4705.767786	1.170948327	0.259891142	4.505533811	6.62E-06	5.22E-05
MSTRG.5492	176.6612874	1.318848347	0.292959965	4.501804013	6.74E-06	5.31E-05
MSTRG.11366	53.22843121	-2.162202569	0.480383154	-4.500995818	6.76E-06	5.32E-05
MSTRG.6503	112.5733647	-1.321060719	0.293668405	-4.49847752	6.84E-06	5.38E-05
MSTRG.15418	798.357968	0.954662101	0.212484203	4.49286152	7.03E-06	5.51E-05
MSTRG.20885	100.8413192	1.42714985	0.317646431	4.492888039	7.03E-06	5.51E-05
MSTRG.14290	286.0714803	1.173359477	0.261305552	4.490373309	7.11E-06	5.57E-05
MSTRG.14059	30.3544898	-2.273030541	0.506413079	-4.488490987	7.17E-06	5.61E-05
MSTRG.14893	253.5527507	-1.180958083	0.263334529	-4.484630595	7.30E-06	5.71E-05
MSTRG.8074	26.8991968	-2.532714939	0.564873924	-4.48368181	7.34E-06	5.73E-05
MSTRG.13384	891.3746221	-1.493815355	0.333412783	-4.480378166	7.45E-06	5.81E-05
MSTRG.683	446.3910526	1.729332096	0.38618589	4.477978458	7.54E-06	5.87E-05
MSTRG.23404	577.8405105	1.219104311	0.272588101	4.472331359	7.74E-06	6.02E-05
MSTRG.13184	427.3788768	0.973564041	0.217746678	4.471085622	7.78E-06	6.04E-05
MSTRG.2269	250.2896234	1.334681298	0.298503663	4.471239261	7.78E-06	6.04E-05
MSTRG.16791	418.7375676	2.165869104	0.485112896	4.464670227	8.02E-06	6.22E-05
MSTRG.21595	108.7795112	-1.270278672	0.284570443	-4.463846143	8.05E-06	6.23E-05
MSTRG.12420	333.1159931	0.986980141	0.221239954	4.461129746	8.15E-06	6.30E-05
MSTRG.457	574.3194179	1.163128661	0.260897639	4.458180099	8.27E-06	6.38E-05
MSTRG.14341	83.31294902	-2.292180739	0.514260302	-4.457238345	8.30E-06	6.41E-05
MSTRG.15960	1015.934513	-1.08171118	0.242789601	-4.455343948	8.38E-06	6.45E-05
MSTRG.2744	3123.0206	1.022173836	0.229573511	4.452490319	8.49E-06	6.53E-05
MSTRG.13115	212.8063061	-1.229584209	0.276289808	-4.450342254	8.57E-06	6.59E-05
MSTRG.8969	1111.489037	-0.931200781	0.209362297	-4.447795978	8.68E-06	6.66E-05
MSTRG.2173	72.65626691	1.443497803	0.324574827	4.447349833	8.69E-06	6.67E-05
MSTRG.11357	124.6444105	1.485993976	0.334324695	4.444762826	8.80E-06	6.74E-05
MSTRG.22044	216.5168468	1.417228583	0.319002074	4.442693941	8.88E-06	6.80E-05
MSTRG.12517	2648.202505	-0.874267644	0.196973949	-4.438493754	9.06E-06	6.92E-05
MSTRG.24750	602.3494329	1.278928326	0.288164026	4.438195644	9.07E-06	6.92E-05
MSTRG.3290	120.1922323	-1.322860959	0.298060855	-4.438224406	9.07E-06	6.92E-05
MSTRG.10998	137.3221718	1.294342829	0.291718417	4.436959587	9.12E-06	6.95E-05
MSTRG.20260	82.96739158	-1.666584344	0.375878632	-4.433836353	9.26E-06	7.04E-05
MSTRG.7572	254.5377197	1.342734969	0.303124913	4.429642409	9.44E-06	7.17E-05
MSTRG.9787	498.6319518	-1.232590981	0.27826848	-4.429502684	9.45E-06	7.17E-05
MSTRG.24462	680.1832874	-2.069160753	0.467176559	-4.429076577	9.46E-06	7.18E-05
MSTRG.20570	36.95335848	-2.183534074	0.493085449	-4.428307669	9.50E-06	7.19E-05
MSTRG.18544	262.7414118	1.345046457	0.303830427	4.426964312	9.56E-06	7.23E-05
MSTRG.22305	2977.033733	-0.820234263	0.185541298	-4.420763844	9.84E-06	7.43E-05
MSTRG.17610	68.7368915	-1.705108832	0.386030041	-4.417036636	1.00E-05	7.55E-05
MSTRG.5486	92.9843622	1.415300864	0.320435525	4.416803868	1.00E-05	7.55E-05
MSTRG.13425	41.44994563	-2.264486536	0.512752849	-4.416331455	1.00E-05	7.56E-05
MSTRG.10416	132.1794131	1.481069235	0.33546844	4.414928677	1.01E-05	7.60E-05
MSTRG.18494	310.0051599	1.199929818	0.271835675	4.414173442	1.01E-05	7.62E-05
MSTRG.7975	400.7833896	1.21417679	0.275166117	4.412522898	1.02E-05	7.67E-05
MSTRG.16317	840.7253347	-1.151064637	0.260911255	-4.41170941	1.03E-05	7.69E-05
MSTRG.10763	11227.50704	1.083876424	0.245747344	4.410531591	1.03E-05	7.72E-05
MSTRG.15713	63.27541559	1.539952104	0.349370184	4.407794865	1.04E-05	7.81E-05
MSTRG.7333	47.10287599	-1.873249534	0.425732315	-4.400064232	1.08E-05	8.09E-05
MSTRG.12195	62.98995364	1.750123089	0.397835607	4.399111237	1.09E-05	8.11E-05
MSTRG.9681	117.9734025	-2.523680188	0.573693018	-4.399008021	1.09E-05	8.11E-05
MSTRG.10911	4941.434878	0.934717777	0.21252018	4.398254219	1.09E-05	8.13E-05
MSTRG.23024	214.1326718	1.325519563	0.301386868	4.398066757	1.09E-05	8.13E-05
MSTRG.16788	163.9333938	-1.14602214	0.260596688	-4.397684982	1.09E-05	8.13E-05
MSTRG.3836	140.3178384	-1.432138014	0.325799393	-4.395766365	1.10E-05	8.19E-05
MSTRG.6041	175.9780925	-1.314938798	0.299150259	-4.395579669	1.10E-05	8.19E-05
MSTRG.21259	920.068929	1.516922273	0.345238529	4.393838308	1.11E-05	8.25E-05
MSTRG.16488	59.29925373	-2.005383732	0.456461012	-4.393329726	1.12E-05	8.26E-05
MSTRG.14074	15.92521546	-5.157024889	1.17451705	-4.390762048	1.13E-05	8.35E-05
MSTRG.5740	91.53001115	1.82282046	0.415250436	4.389689458	1.14E-05	8.38E-05
MSTRG.20539	186.6845788	1.313252691	0.299256522	4.388384526	1.14E-05	8.42E-05
MSTRG.20581	27.3240798	-2.495932068	0.568812817	-4.387967346	1.14E-05	8.43E-05
MSTRG.22521	356.8346014	1.414188124	0.322413222	4.38625971	1.15E-05	8.49E-05
MSTRG.12448	66.58481765	-1.50493431	0.34313715	-4.385809897	1.16E-05	8.49E-05
MSTRG.5300	767.4817005	-0.976114678	0.222781027	-4.381498233	1.18E-05	8.65E-05
MSTRG.22043	1903.213577	-1.149549325	0.262425811	-4.380473555	1.18E-05	8.69E-05
MSTRG.10275	96.46821116	-1.781310751	0.406824349	-4.378574573	1.19E-05	8.75E-05
MSTRG.4877	103.03778	-1.438338411	0.328602642	-4.377135875	1.20E-05	8.79E-05
MSTRG.8277	1748.615385	1.274833924	0.291252483	4.377074871	1.20E-05	8.79E-05
MSTRG.1117	75.845074	-1.864243953	0.426036383	-4.375785793	1.21E-05	8.83E-05
MSTRG.17981	162.2726686	-1.116652903	0.25518551	-4.375847614	1.21E-05	8.83E-05
MSTRG.21254	54.65587963	-1.987964461	0.454919514	-4.369925667	1.24E-05	9.06E-05
MSTRG.16463	96.01943165	-1.490311312	0.341319316	-4.366325728	1.26E-05	9.20E-05
MSTRG.12688	61.44388939	1.590980009	0.364878466	4.360301193	1.30E-05	9.44E-05
MSTRG.4911	624.7253332	-0.97965575	0.224736357	-4.359133353	1.31E-05	9.48E-05
MSTRG.9112	905.1010295	-1.249325206	0.286699924	-4.357605636	1.31E-05	9.54E-05
MSTRG.15745	56.60216889	1.997315677	0.458416582	4.356988282	1.32E-05	9.56E-05
MSTRG.7971	125.1214815	1.702615356	0.390797314	4.356773431	1.32E-05	9.56E-05
MSTRG.14015	46.9329017	-2.535860522	0.582252483	-4.355259268	1.33E-05	9.61E-05
MSTRG.2102	35.00745621	-2.411139289	0.553911048	-4.352935906	1.34E-05	9.70E-05
MSTRG.17325	512.1080535	1.088358669	0.250048756	4.352585813	1.35E-05	9.71E-05
MSTRG.14126	2247.576116	0.990617414	0.227819879	4.348248357	1.37E-05	9.89E-05
MSTRG.14130	74.4230593	-1.585194537	0.364601972	-4.347739886	1.38E-05	9.90E-05
MSTRG.13354	11374.8208	-0.752260954	0.173060914	-4.346798686	1.38E-05	9.94E-05
MSTRG.11655	1104.905146	1.171281464	0.269784055	4.341551857	1.41E-05	0.00010165
MSTRG.20176	1501.99148	1.003573604	0.231336682	4.338151638	1.44E-05	0.000103124
MSTRG.10375	219.0944287	1.206653901	0.278488359	4.332870158	1.47E-05	0.000105517
MSTRG.11975	309.3701487	-1.225765049	0.28308447	-4.330032833	1.49E-05	0.000106771
MSTRG.15967	308.5784762	-1.007127794	0.232764838	-4.326803842	1.51E-05	0.000108116
MSTRG.22047	176.7811008	2.130276956	0.492321977	4.326999519	1.51E-05	0.000108116
MSTRG.4941	791.1511335	-0.934144403	0.216021501	-4.324312158	1.53E-05	0.000109229
MSTRG.19236	20.05152782	-3.889195739	0.899867799	-4.321963451	1.55E-05	0.000110281
MSTRG.6176	32.38649965	-2.217268771	0.513150036	-4.320897625	1.55E-05	0.000110697
MSTRG.18064	144.2245816	-1.132540808	0.262273575	-4.318165901	1.57E-05	0.000111956
MSTRG.6496	159.0930103	-1.493970603	0.346020058	-4.317583814	1.58E-05	0.000112132
MSTRG.17729	14.62297184	-3.638422095	0.842791595	-4.317107714	1.58E-05	0.000112255
MSTRG.22230	75.43232845	1.773387387	0.411027777	4.314519565	1.60E-05	0.000113458
MSTRG.17863	102.6313045	1.706351544	0.39554828	4.313889431	1.60E-05	0.000113661
MSTRG.5806	789.4001899	1.317188107	0.305361089	4.313542735	1.61E-05	0.000113719
MSTRG.2259	71.116496	1.843632692	0.427563659	4.311949001	1.62E-05	0.000114421
MSTRG.5003	65274.74529	1.115679447	0.258872769	4.309759776	1.63E-05	0.000115438
MSTRG.9120	55.34720214	1.754120191	0.407229789	4.307445671	1.65E-05	0.000116529
MSTRG.22778	105.9168697	-1.378089288	0.320031463	-4.306105644	1.66E-05	0.000117113
MSTRG.21262	400.919756	1.001522831	0.232641501	4.305005033	1.67E-05	0.000117573
MSTRG.3702	446.7724152	-1.0294079	0.239187604	-4.303767766	1.68E-05	0.000118107
MSTRG.8281	82.52023561	5.871150596	1.364423879	4.303025391	1.68E-05	0.00011838
MSTRG.15008	1969.428195	1.456837084	0.338595272	4.30259134	1.69E-05	0.000118487
MSTRG.10567	46.49066766	1.745435612	0.405778399	4.301450289	1.70E-05	0.000118974
MSTRG.7169	308.3974778	1.333511541	0.310507472	4.294619813	1.75E-05	0.000122568
MSTRG.80	23.86090511	-2.358068381	0.549827793	-4.288739874	1.80E-05	0.000125726
MSTRG.4785	177.1786848	-1.163973284	0.271569579	-4.286095997	1.82E-05	0.000127098
MSTRG.11620	280.3131581	1.53280613	0.357655555	4.285704801	1.82E-05	0.000127189
MSTRG.24859	402.9436955	1.168394276	0.272796459	4.283025817	1.84E-05	0.000128597
MSTRG.22560	143.4484592	1.093280337	0.255328552	4.281856953	1.85E-05	0.00012914
MSTRG.18557	350.1331596	1.070527733	0.250264984	4.277576976	1.89E-05	0.00013151
MSTRG.9539	3740.971748	1.043450456	0.244017783	4.276124655	1.90E-05	0.000132233
MSTRG.10248	187.7244058	1.711133434	0.400221188	4.275469376	1.91E-05	0.000132485
MSTRG.12789	732.4198916	1.58781488	0.371399614	4.275219526	1.91E-05	0.000132496
MSTRG.9289	2892.245426	1.037605759	0.242738639	4.274580105	1.91E-05	0.000132739
MSTRG.4701	344.6725715	1.973125344	0.4618734	4.272004715	1.94E-05	0.000134142
MSTRG.16967	341.9809577	1.076215232	0.251971807	4.271173215	1.94E-05	0.000134504
MSTRG.19789	173.0779816	1.303254334	0.30514919	4.270875944	1.95E-05	0.000134545
MSTRG.9235	86.84681249	1.826753132	0.427835927	4.269751599	1.96E-05	0.000135085
MSTRG.5034	48.21296449	-2.544034978	0.595953844	-4.268845657	1.96E-05	0.000135495
MSTRG.13059	73.54739658	1.815198366	0.425505284	4.265983139	1.99E-05	0.000137103
MSTRG.6593	102.4890501	1.718553753	0.403144694	4.262870826	2.02E-05	0.000138884
MSTRG.13461	60.06936299	-1.924502365	0.451600383	-4.261516236	2.03E-05	0.000139585
MSTRG.9582	358.7490059	1.530181699	0.359272775	4.259108419	2.05E-05	0.000140952
MSTRG.23745	277.8750124	-1.327866741	0.311874613	-4.257694234	2.07E-05	0.000141701
MSTRG.8535	306.3650626	-0.951325256	0.223465851	-4.257139303	2.07E-05	0.000141908
MSTRG.2456	189.8348054	1.417050565	0.333101172	4.254114613	2.10E-05	0.000143692
MSTRG.1937	35.77608717	1.773334023	0.417022879	4.252366263	2.12E-05	0.000144671
MSTRG.16397	1130.714819	-1.272775264	0.299679063	-4.247127746	2.17E-05	0.000147943
MSTRG.24189	18606.41944	1.266585917	0.298277737	4.246330711	2.17E-05	0.000148318
MSTRG.16240	154.6267672	-1.449468165	0.341412491	-4.245504194	2.18E-05	0.000148702
MSTRG.3848	156.8187894	-1.09953916	0.259015769	-4.245066488	2.19E-05	0.000148702
MSTRG.9190	73.10788585	-1.416256378	0.333610922	-4.245233851	2.18E-05	0.000148702
MSTRG.15020	360.8625952	1.389058655	0.327345894	4.243397217	2.20E-05	0.00014966
MSTRG.4204	149.9219568	-1.986537225	0.468190276	-4.243012572	2.21E-05	0.000149765
MSTRG.18664	522.9264571	1.346283649	0.317435685	4.241122574	2.22E-05	0.000150879
MSTRG.12518	412.9653644	-1.005360259	0.237096788	-4.240294717	2.23E-05	0.000151283
MSTRG.20063	58.37183924	-1.77441033	0.4186477	-4.23843325	2.25E-05	0.000152388
MSTRG.10668	124.5187733	1.508326347	0.356152295	4.23506003	2.28E-05	0.000154537
MSTRG.2370	917.9783636	0.996641845	0.235716824	4.228131993	2.36E-05	0.000159211
MSTRG.13595	28.96834844	2.517814912	0.596012177	4.224435356	2.40E-05	0.000161681
MSTRG.22884	82.93552848	-1.408645605	0.333469401	-4.224212475	2.40E-05	0.000161681
MSTRG.16409	41.02859428	-1.722614965	0.407865553	-4.223487254	2.41E-05	0.000162039
MSTRG.3515	52.00546166	-1.609637631	0.381411895	-4.220208262	2.44E-05	0.000164248
MSTRG.23954	14.0271757	3.893748778	0.923094872	4.218145822	2.46E-05	0.000165591
MSTRG.13129	303.2885861	-0.937324753	0.222416375	-4.214279426	2.51E-05	0.000168284
MSTRG.1779	58.21137785	1.622126493	0.384948874	4.213875148	2.51E-05	0.000168417
MSTRG.11267	1511.194922	1.382893724	0.328222316	4.213283671	2.52E-05	0.000168689
MSTRG.15744	2718.833803	1.20610132	0.286462769	4.210324872	2.55E-05	0.000170743
MSTRG.21146	387.1343482	-1.73494304	0.412163679	-4.209354513	2.56E-05	0.000171306
MSTRG.20435	102.920128	1.462578171	0.347581357	4.207872896	2.58E-05	0.000172261
MSTRG.12304	131.1907408	-1.19136153	0.283246229	-4.206098466	2.60E-05	0.000173445
MSTRG.10721	125.1380783	-1.695217669	0.403072899	-4.205734682	2.60E-05	0.000173551
MSTRG.1526	9469.471279	-1.617411518	0.384754161	-4.203753154	2.63E-05	0.000174904
MSTRG.12194	13877.4902	0.922855153	0.219642774	4.201618548	2.65E-05	0.000176386
MSTRG.14108	642.5679878	1.501362328	0.357451572	4.200183868	2.67E-05	0.000177331
MSTRG.21170	28.58377859	-2.317678612	0.551848309	-4.199847266	2.67E-05	0.000177418
MSTRG.18687	1256.72409	-0.866100599	0.206246821	-4.19934036	2.68E-05	0.000177582
MSTRG.21914	692.2609579	0.959620069	0.228525145	4.199188099	2.68E-05	0.000177582
MSTRG.21802	89.33886204	-1.26408189	0.30112557	-4.197856364	2.69E-05	0.000178453
MSTRG.22484	508.3251148	1.076097781	0.256589908	4.193842961	2.74E-05	0.000181462
MSTRG.628	341.1020571	-0.994581535	0.237165983	-4.193609563	2.75E-05	0.000181469
MSTRG.9761	76.46584836	1.305226692	0.31146679	4.190580613	2.78E-05	0.000183727
MSTRG.18311	42.14246556	-1.836822029	0.439381119	-4.180475563	2.91E-05	0.000191897
MSTRG.4288	60.98203487	2.150637496	0.514636395	4.178945596	2.93E-05	0.000193002
MSTRG.22550	595.7009352	0.988716093	0.236682393	4.17739604	2.95E-05	0.000194129
MSTRG.25079	589.9458574	-1.047192213	0.250791448	-4.175549933	2.97E-05	0.000195518
MSTRG.13838	650.9186095	1.737672662	0.416720852	4.169872123	3.05E-05	0.000200256
MSTRG.1508	428.0292302	1.164353868	0.279666616	4.163363812	3.14E-05	0.000205649
MSTRG.8010	1315.109387	0.925983128	0.22240046	4.163584584	3.13E-05	0.000205649
MSTRG.11917	48.11262721	-2.16057085	0.519891035	-4.155814783	3.24E-05	0.000212351
MSTRG.5984	61.73232322	-1.852670958	0.445904883	-4.154856853	3.25E-05	0.000213034
MSTRG.10612	489.7914122	1.199817397	0.288911233	4.152892867	3.28E-05	0.000214662
MSTRG.4791	98.80221376	-1.42110552	0.342359398	-4.150917219	3.31E-05	0.000216312
MSTRG.18329	69.91874679	-1.364911172	0.328929088	-4.149560561	3.33E-05	0.000217251
MSTRG.18427	949.8556032	1.219141427	0.293812014	4.149392704	3.33E-05	0.000217251
MSTRG.21821	159.0026218	1.150122491	0.277187616	4.149256411	3.34E-05	0.000217251
MSTRG.20454	42.72263439	-1.682128829	0.405450708	-4.148787499	3.34E-05	0.000217484
MSTRG.20572	105.5939699	-1.656423901	0.399372858	-4.147562529	3.36E-05	0.000218438
MSTRG.10156	63.71884277	-1.437129935	0.346945637	-4.142233773	3.44E-05	0.00022336
MSTRG.7842	3533.333649	1.046835288	0.252820317	4.140629601	3.46E-05	0.00022471
MSTRG.11592	160.6524666	1.46333926	0.353500517	4.139567522	3.48E-05	0.000225534
MSTRG.23780	92.19248566	1.597095637	0.385990552	4.137654745	3.51E-05	0.000227202
MSTRG.444	113.5112011	1.263890317	0.305618415	4.135517537	3.54E-05	0.000229105
MSTRG.23487	3546.393189	0.978783084	0.236724274	4.134696735	3.55E-05	0.000229703
MSTRG.3980	1091.172809	-0.92852751	0.224749687	-4.131385113	3.61E-05	0.000232813
MSTRG.11368	82.49785658	-1.350175326	0.327153434	-4.127040055	3.67E-05	0.000236639
MSTRG.16037	80.89344219	-1.395119146	0.338039926	-4.127083925	3.67E-05	0.000236639
MSTRG.22346	572.1968918	1.033562646	0.250440894	4.126972362	3.68E-05	0.000236639
MSTRG.4765	384.9619551	1.495307721	0.362558179	4.124324889	3.72E-05	0.000239147
MSTRG.6023	173.8099019	1.374586103	0.333305986	4.124096656	3.72E-05	0.000239154
MSTRG.1739	354.6370268	1.051843073	0.255897303	4.110410939	3.95E-05	0.000253537
MSTRG.22754	399.0038158	0.972325583	0.23660601	4.109471189	3.97E-05	0.000254327
MSTRG.1049	579.7080282	0.986178559	0.240016979	4.108786647	3.98E-05	0.000254594
MSTRG.19004	17.60123502	-2.840635916	0.691328728	-4.10895107	3.97E-05	0.000254594
MSTRG.14065	416.0741822	0.883174782	0.214986849	4.108040958	3.99E-05	0.000254929
MSTRG.14920	138.5661627	-1.226464216	0.298539834	-4.108209612	3.99E-05	0.000254929
MSTRG.17542	61.24171141	-1.427555699	0.347597907	-4.106916849	4.01E-05	0.000255742
MSTRG.21104	3534.649657	0.980918954	0.238848654	4.106864068	4.01E-05	0.000255742
MSTRG.5084	38.28580993	-1.879479782	0.457883184	-4.104714586	4.05E-05	0.000257886
MSTRG.19873	82.51183456	-1.331843981	0.324506164	-4.104217827	4.06E-05	0.000257949
MSTRG.25222	2047.567836	1.361241853	0.331653337	4.104411744	4.05E-05	0.000257949
MSTRG.13831	411.0168706	-1.242840195	0.302902037	-4.103109394	4.08E-05	0.000258943
MSTRG.5667	30.32977342	1.997545765	0.486949224	4.102164383	4.09E-05	0.000259756
MSTRG.20273	1399.406167	1.375800841	0.335679583	4.09855383	4.16E-05	0.000263591
MSTRG.8282	157.7254359	1.18299172	0.288851828	4.095496744	4.21E-05	0.000266841
MSTRG.13919	30.89954755	-2.361386868	0.576786805	-4.094037605	4.24E-05	0.000268272
MSTRG.20661	2770.28147	1.320253444	0.322504454	4.093752594	4.24E-05	0.000268349
MSTRG.15457	48.47356906	1.884930473	0.460812794	4.090447349	4.31E-05	0.000271945
MSTRG.23571	136.196164	-1.348784722	0.329821486	-4.089438623	4.32E-05	0.000272615
MSTRG.4818	6123.619531	1.034987066	0.253085426	4.089477149	4.32E-05	0.000272615
MSTRG.18678	22373.56989	1.095279171	0.267950459	4.087618187	4.36E-05	0.000274246
MSTRG.9788	15.99934697	-3.034900567	0.742427482	-4.087807416	4.35E-05	0.000274246
MSTRG.12978	46.90883618	-1.614355855	0.395027194	-4.086695498	4.38E-05	0.000275079
MSTRG.11531	4135.363376	1.650285314	0.403991036	4.084955273	4.41E-05	0.000276889
MSTRG.3639	207.4695805	-1.183644718	0.289905681	-4.082861414	4.45E-05	0.000279134
MSTRG.19253	123.7040632	1.345555265	0.329822356	4.079636333	4.51E-05	0.000282665
MSTRG.489	356.519416	1.051062537	0.257644617	4.079505135	4.51E-05	0.000282665
MSTRG.5566	969.7019366	-0.996325881	0.24442406	-4.076218532	4.58E-05	0.000286291
MSTRG.9135	229.4321363	-1.062845328	0.260750209	-4.076105367	4.58E-05	0.000286291
MSTRG.3388	22.97337857	-2.478283995	0.608295231	-4.074146682	4.62E-05	0.000288441
MSTRG.12213	43.92179666	-1.927124203	0.473059931	-4.073742201	4.63E-05	0.000288673
MSTRG.8156	55.60372918	2.01212785	0.494011518	4.073038333	4.64E-05	0.000289278
MSTRG.10983	130.6482506	1.51632933	0.372495947	4.070727056	4.69E-05	0.000291655
MSTRG.4059	69.6667114	-1.309485391	0.321685654	-4.070698752	4.69E-05	0.000291655
MSTRG.2599	36.67987725	2.306472788	0.566805633	4.069248178	4.72E-05	0.000293204
MSTRG.8059	72.41043606	1.338719608	0.329126418	4.067493623	4.75E-05	0.000295145
MSTRG.2023	18.80690657	-2.61790496	0.643657749	-4.067231327	4.76E-05	0.000295203
MSTRG.19694	69.65149369	1.62276546	0.399156264	4.065489145	4.79E-05	0.000297142
MSTRG.2033	155.6561498	1.674415871	0.412199326	4.062150922	4.86E-05	0.000301145
MSTRG.7857	83.06664749	1.315770617	0.324043041	4.060481018	4.90E-05	0.000303027
MSTRG.14460	34.71250755	1.800917211	0.444249181	4.05384475	5.04E-05	0.000311469
MSTRG.15717	71.56805563	1.368330897	0.337648741	4.052527759	5.07E-05	0.000312896
MSTRG.17841	77.58276483	1.304275085	0.321856939	4.052344151	5.07E-05	0.000312896
MSTRG.23065	35.12680622	2.305808076	0.56921439	4.050860478	5.10E-05	0.000314307
MSTRG.24028	474.4990236	1.094422019	0.270162132	4.050982308	5.10E-05	0.000314307
MSTRG.19755	100.7030536	-1.496658454	0.370023759	-4.044763118	5.24E-05	0.000322303
MSTRG.18818	314.089841	1.378246654	0.341087643	4.040740503	5.33E-05	0.000327581
MSTRG.15980	37.43316879	-2.015991259	0.499008168	-4.039996513	5.35E-05	0.000328223
MSTRG.17927	22.15212806	-2.566375662	0.635264958	-4.039850819	5.35E-05	0.000328223
MSTRG.3479	4524.062453	1.634946746	0.404779003	4.039109573	5.37E-05	0.00032896
MSTRG.12924	180.4872651	1.811445044	0.448926513	4.035059169	5.46E-05	0.00033438
MSTRG.20822	82.61067559	1.388296324	0.344186226	4.033561545	5.49E-05	0.000336211
MSTRG.11724	19.05522795	-2.96038452	0.734167086	-4.032303514	5.52E-05	0.000337363
MSTRG.22017	43.19402996	-1.829618366	0.453722568	-4.032460569	5.52E-05	0.000337363
MSTRG.8438	62.80739282	1.459686942	0.362015268	4.032114308	5.53E-05	0.000337363
MSTRG.8526	113.7419104	-1.616291702	0.400983074	-4.030822761	5.56E-05	0.000338913
MSTRG.16556	60.32302006	1.393240297	0.346040495	4.026234837	5.67E-05	0.000345276
MSTRG.23815	379.0883183	1.044039174	0.259439222	4.024214867	5.72E-05	0.000347936
MSTRG.11997	27.1532393	-2.564499539	0.637471372	-4.022925028	5.75E-05	0.000349529
MSTRG.11760	297.0825908	1.509837304	0.375473675	4.021153563	5.79E-05	0.000351161
MSTRG.21848	1019.614592	1.020482251	0.253764362	4.021377323	5.79E-05	0.000351161
MSTRG.23535	100.4765929	1.380497285	0.343324121	4.020973776	5.80E-05	0.000351161
MSTRG.6353	121.4753823	-1.487486102	0.369911122	-4.021198644	5.79E-05	0.000351161
MSTRG.3360	28.02593845	-2.113147321	0.52561877	-4.020304148	5.81E-05	0.000351524
MSTRG.8675	67.39821066	1.671274136	0.41569468	4.020436673	5.81E-05	0.000351524
MSTRG.4263	31.24888458	-2.118853741	0.527088662	-4.019919024	5.82E-05	0.000351781
MSTRG.4045	21.645229	-2.489461589	0.619530335	-4.01830459	5.86E-05	0.000353879
MSTRG.3407	1015.299977	-0.911524834	0.227028806	-4.0150184	5.94E-05	0.000358523
MSTRG.14668	390.07633	1.120509916	0.279095389	4.014791934	5.95E-05	0.000358544
MSTRG.14307	293.7089346	-0.971503328	0.24204367	-4.013752261	5.98E-05	0.000359598
MSTRG.4768	110.0973132	-2.009834786	0.500799719	-4.013250625	5.99E-05	0.000359598
MSTRG.6873	326.3363374	1.403195885	0.349609384	4.013610474	5.98E-05	0.000359598
MSTRG.9145	2162.940935	-0.773386361	0.192701452	-4.013391459	5.99E-05	0.000359598
MSTRG.17746	55.25365299	1.385371685	0.34530493	4.012024049	6.02E-05	0.000361148
MSTRG.13054	31.71244711	-1.964168498	0.489599078	-4.011789621	6.03E-05	0.000361183
MSTRG.20299	3529.250432	0.905605349	0.226034844	4.006485601	6.16E-05	0.000369056
MSTRG.24892	334.7286293	0.949759655	0.237157722	4.00475956	6.21E-05	0.000371429
MSTRG.1563	62.14748287	-1.538280726	0.384356139	-4.002227541	6.27E-05	0.000375092
MSTRG.20367	1945.670709	1.121107169	0.280155282	4.001734897	6.29E-05	0.000375538
MSTRG.4436	147.071627	1.15290051	0.288204132	4.000291404	6.33E-05	0.000377499
MSTRG.7191	2266.873038	0.836153462	0.209204368	3.996826016	6.42E-05	0.000382724
MSTRG.20813	7902.770673	1.074740167	0.269078487	3.994151215	6.49E-05	0.000386726
MSTRG.17101	42.98340361	-2.43508935	0.609765721	-3.993483509	6.51E-05	0.000387207
MSTRG.1790	33.68980779	-2.269515249	0.568311557	-3.993434977	6.51E-05	0.000387207
MSTRG.24069	1941.391709	1.210354556	0.303168932	3.992343642	6.54E-05	0.000388648
MSTRG.3610	263.4561469	1.349440259	0.338070598	3.991593081	6.56E-05	0.000389534
MSTRG.16423	335.9713446	1.170916565	0.293470991	3.989888608	6.61E-05	0.000391996
MSTRG.22317	562.0757445	0.889072744	0.222969856	3.987412299	6.68E-05	0.000395758
MSTRG.7829	1045.520815	0.963616356	0.241951221	3.982688544	6.81E-05	0.000403353
MSTRG.13376	24.54696186	-2.302582435	0.578322613	-3.981484353	6.85E-05	0.000405044
MSTRG.20335	34.29384574	-2.266933603	0.569415052	-3.981162062	6.86E-05	0.000405235
MSTRG.15722	362.5209813	1.109522078	0.278896404	3.978258812	6.94E-05	0.000409852
MSTRG.2087	53.45247793	1.425895199	0.35851873	3.97718467	6.97E-05	0.000411344
MSTRG.17849	79.06039564	1.288527841	0.324088542	3.975851267	7.01E-05	0.000413291
MSTRG.21762	820.4832316	0.929520528	0.234021999	3.971936535	7.13E-05	0.000419429
MSTRG.8523	118.8573473	-1.477887878	0.372083709	-3.971923099	7.13E-05	0.000419429
MSTRG.24464	542.5301715	1.032551672	0.260045486	3.970657932	7.17E-05	0.000421292
MSTRG.21919	15.33709378	-5.075014454	1.278411891	-3.969780389	7.19E-05	0.000422475
MSTRG.20395	64.00203636	1.632339343	0.411343591	3.968311116	7.24E-05	0.000424715
MSTRG.12444	5402.952071	-0.905115889	0.228144374	-3.967294355	7.27E-05	0.000425783
MSTRG.21442	246.0766561	-1.428622408	0.360092175	-3.967379762	7.27E-05	0.000425783
MSTRG.11987	154.818779	-1.281427346	0.323130932	-3.965659793	7.32E-05	0.000428195
MSTRG.914	26.4951724	-2.120633439	0.534766661	-3.965530377	7.32E-05	0.000428195
MSTRG.4902	115.3665799	1.564075923	0.394745645	3.962237311	7.43E-05	0.000433388
MSTRG.6856	424.9476055	-1.00135445	0.252722219	-3.962273105	7.42E-05	0.000433388
MSTRG.10125	202.8605721	-0.962026935	0.242833895	-3.961666619	7.44E-05	0.000433839
MSTRG.22871	711.0243007	-0.905439804	0.228555624	-3.961573068	7.45E-05	0.000433839
MSTRG.15553	222.3245034	-1.03291837	0.260894636	-3.959139922	7.52E-05	0.0004379
MSTRG.2272	52.94798309	1.644212759	0.415411977	3.958029258	7.56E-05	0.000439559
MSTRG.120	37.60487248	-2.075605863	0.524471728	-3.957517158	7.57E-05	0.000440119
MSTRG.13992	35.23303853	-2.025376772	0.512111802	-3.95495039	7.66E-05	0.000444485
MSTRG.20905	310.5672948	1.405745517	0.355549183	3.953730127	7.69E-05	0.000446371
MSTRG.16550	532.841785	-0.909282088	0.229999429	-3.953410196	7.70E-05	0.000446582
MSTRG.23562	128.7200104	1.470554911	0.372509452	3.947698251	7.89E-05	0.000456973
MSTRG.22445	80.10839888	-1.296360949	0.328509969	-3.946184507	7.94E-05	0.000459472
MSTRG.14870	28.10296017	-2.399026736	0.607996803	-3.945788404	7.95E-05	0.000459835
MSTRG.548	76.30319401	1.444120042	0.366118626	3.944404734	8.00E-05	0.000462098
MSTRG.14545	13.34567987	-3.200582458	0.811657412	-3.943267701	8.04E-05	0.000463895
MSTRG.246	112.3674998	-1.145472534	0.290518489	-3.942855886	8.05E-05	0.000464292
MSTRG.6694	16.81124464	-2.933086393	0.744070806	-3.941945266	8.08E-05	0.000465657
MSTRG.16846	15479.79839	0.879572943	0.223144638	3.94171668	8.09E-05	0.0004657
MSTRG.200	1946.838148	0.732341023	0.185834376	3.94082645	8.12E-05	0.000466629
MSTRG.8046	652.5773635	-1.005753729	0.255207646	-3.940923184	8.12E-05	0.000466629
MSTRG.10421	1181.271517	-0.803547943	0.203967386	-3.939590335	8.16E-05	0.000468637
MSTRG.18331	14.23031788	-3.300828106	0.83793564	-3.939238228	8.17E-05	0.000468821
MSTRG.21488	2044.367502	1.089436594	0.276571002	3.939084666	8.18E-05	0.000468821
MSTRG.11765	658.649482	1.380399146	0.350536502	3.937961204	8.22E-05	0.000470617
MSTRG.9797	121.4051781	1.352567481	0.343520135	3.937374676	8.24E-05	0.000471365
MSTRG.14738	12.13603662	-4.732612878	1.202115696	-3.936902989	8.25E-05	0.000471889
MSTRG.6111	180.6584067	1.513297331	0.384481932	3.935938742	8.29E-05	0.000473383
MSTRG.19829	787.4310996	0.973806054	0.24772383	3.931014858	8.46E-05	0.000482773
MSTRG.9170	204.3046864	1.835377262	0.467097094	3.929327087	8.52E-05	0.000485759
MSTRG.24243	34.39669442	-2.349212613	0.598147818	-3.927478363	8.58E-05	0.00048909
MSTRG.20804	138.6107726	1.57701653	0.401565386	3.927172471	8.60E-05	0.000489295
MSTRG.1910	1329.828465	1.014450939	0.258340582	3.926796676	8.61E-05	0.000489643
MSTRG.3328	300.0844277	-0.933582499	0.237795347	-3.925991454	8.64E-05	0.00049045
MSTRG.9332	6065.649535	1.112478578	0.283351492	3.926143355	8.63E-05	0.00049045
MSTRG.1740	44.3081812	-1.553846967	0.396194788	-3.921926822	8.78E-05	0.000498377
MSTRG.21757	5136.676479	0.876352814	0.223614924	3.919026504	8.89E-05	0.000503557
MSTRG.6807	246.2950182	1.234497767	0.314986897	3.919203553	8.88E-05	0.000503557
MSTRG.20580	39.17994368	2.782212047	0.710551253	3.915568419	9.02E-05	0.000510398
MSTRG.2657	208.3230501	1.056557141	0.2699121	3.914448974	9.06E-05	0.000512338
MSTRG.15425	47.44581988	-2.125667488	0.543121457	-3.913797661	9.09E-05	0.000513289
MSTRG.17677	92.14193376	1.505977163	0.384889225	3.912754797	9.12E-05	0.000515077
MSTRG.2724	308.6879834	0.974039954	0.24895711	3.912480959	9.14E-05	0.000515226
MSTRG.16891	26.35989374	-2.345102836	0.600826075	-3.90313093	9.50E-05	0.000535099
MSTRG.7427	75.18632496	-1.670443419	0.428008984	-3.902823262	9.51E-05	0.000535329
MSTRG.12826	2197.054181	0.93691958	0.240178192	3.900935268	9.58E-05	0.000538615
MSTRG.21833	127.8273317	1.344975326	0.344766693	3.901117345	9.57E-05	0.000538615
MSTRG.12312	29.01050682	-1.913177744	0.490748558	-3.898488775	9.68E-05	0.000543628
MSTRG.21406	66.2404664	-1.407872127	0.361518184	-3.894332819	9.85E-05	0.000552569
MSTRG.437	203.3240412	1.209098247	0.310646419	3.892200824	9.93E-05	0.000556981
MSTRG.1304	77.64783969	-1.428840352	0.367246593	-3.890683752	1.00E-04	0.000559755
MSTRG.6710	238.1656378	1.132895565	0.291188698	3.890589071	0.000100001	0.000559755
MSTRG.17294	219.1264554	-1.01726342	0.261608211	-3.888499581	0.000100866	0.000564123
MSTRG.16060	121.667154	-1.55165003	0.399207805	-3.886822877	0.000101565	0.000567558
MSTRG.20735	129.5448876	-1.435458427	0.369566201	-3.884171283	0.00010268	0.000573308
MSTRG.12870	35.12731184	-1.818788238	0.468303181	-3.883783653	0.000102843	0.000573745
MSTRG.11284	137.0689513	1.176605041	0.303017219	3.882964285	0.000103191	0.000574844
MSTRG.23234	43.72945412	1.710449447	0.440506737	3.882913257	0.000103212	0.000574844
MSTRG.144	284.4813857	0.844130898	0.217415705	3.882566336	0.00010336	0.000575186
MSTRG.14457	143.9242076	-1.157744637	0.298214188	-3.882258738	0.000103491	0.000575436
MSTRG.4134	121.0012805	-1.219162419	0.31424571	-3.879646984	0.000104608	0.000581166
MSTRG.7791	19.49507134	-2.420721185	0.62418872	-3.87818797	0.000105237	0.000584177
MSTRG.18296	49.02838859	1.490222698	0.384811582	3.872603544	0.000107679	0.000597234
MSTRG.23333	71.47384854	1.530274233	0.395178396	3.872363082	0.000107785	0.000597328
MSTRG.23590	322.464662	-1.893967456	0.489195021	-3.871600026	0.000108123	0.000598706
MSTRG.24473	106.1888655	-1.123010885	0.290107457	-3.871016954	0.000108382	0.000599148
MSTRG.3509	111.4125405	-1.371684613	0.354346135	-3.871030264	0.000108376	0.000599148
MSTRG.51	112.9245458	-1.15307149	0.298053605	-3.868671507	0.00010943	0.00060444
MSTRG.22233	2483.662997	0.96217559	0.248790932	3.867406191	0.000109999	0.000607083
MSTRG.22779	79.94776564	-1.237139194	0.319990807	-3.866171049	0.000110557	0.000609661
MSTRG.1863	55.23221297	1.576862951	0.407937366	3.865453581	0.000110883	0.000610952
MSTRG.10953	60.30603773	-1.340872021	0.346914993	-3.865131362	0.000111029	0.000611256
MSTRG.20582	334.681118	1.442531818	0.373281407	3.86446201	0.000111334	0.000612308
MSTRG.4533	167.3658871	1.305061118	0.337721626	3.864310186	0.000111404	0.000612308
MSTRG.20903	135.8552862	1.222795719	0.316663107	3.861503576	0.000112691	0.000617863
MSTRG.4825	2056.644789	-1.058286542	0.274057066	-3.8615554	0.000112667	0.000617863
MSTRG.858	72.43256413	1.560786437	0.40415494	3.861851685	0.000112531	0.000617863
MSTRG.17244	157.8800462	1.810509863	0.46896543	3.860646748	0.000113087	0.000619526
MSTRG.191	2185.129649	0.748909393	0.194129475	3.857783023	0.00011442	0.000626315
MSTRG.15313	33.77845739	-1.785669825	0.462963688	-3.857040778	0.000114768	0.000627705
MSTRG.16831	32.61762655	-1.834103242	0.47582395	-3.854583699	0.000115927	0.000633524
MSTRG.2540	57.19511627	-1.424117986	0.369529362	-3.853869634	0.000116266	0.00063443
MSTRG.9622	24.1497741	-2.108913943	0.547224825	-3.853834558	0.000116282	0.00063443
MSTRG.18399	114.5019282	1.079145306	0.280072628	3.853090933	0.000116636	0.000635325
MSTRG.18568	276.6714447	-0.859898834	0.223169344	-3.853122562	0.000116621	0.000635325
MSTRG.10373	102.0472959	1.591426979	0.413177186	3.851681633	0.000117309	0.000638473
MSTRG.24432	786.8461943	-0.793217174	0.205992416	-3.850710571	0.000117776	0.000640489
MSTRG.14752	145828.9585	1.041421164	0.270626968	3.848179549	0.000118999	0.000646615
MSTRG.19520	740.901139	1.033419924	0.268619838	3.8471467	0.000119501	0.000648293
MSTRG.19911	22.95646855	-2.284930684	0.593928564	-3.847147324	0.000119501	0.000648293
MSTRG.14156	173.2153184	1.474414461	0.383328022	3.84635189	0.00011989	0.000649871
MSTRG.771	73.80472804	-1.412855237	0.367406459	-3.845482851	0.000120315	0.000651651
MSTRG.8177	543.7048259	-1.100038918	0.286127843	-3.844571389	0.000120763	0.000653548
MSTRG.7401	184.2595316	1.228663142	0.319619509	3.844143138	0.000120974	0.000654161
MSTRG.14080	23.95254388	2.596689584	0.675560073	3.843758223	0.000121164	0.00065466
MSTRG.18958	78.37964764	1.28471992	0.334262963	3.843440834	0.000121321	0.000654978
MSTRG.6544	102.3649948	-1.27567599	0.332043925	-3.841889256	0.000122091	0.000658602
MSTRG.20647	601.0181721	0.882091051	0.229612832	3.841645277	0.000122212	0.000658726
MSTRG.18977	209.7730557	1.089901628	0.283791198	3.840505393	0.000122781	0.000661259
MSTRG.11037	23.58114089	-2.058280244	0.53617378	-3.838830471	0.000123622	0.00066525
MSTRG.15485	1430.752549	1.035980545	0.270495523	3.829936019	0.000128177	0.000688653
MSTRG.8387	23.78414583	-2.163710897	0.564922321	-3.830103391	0.000128089	0.000688653
MSTRG.3112	123.2459336	-1.138856504	0.297398733	-3.829392592	0.00012846	0.000689622
MSTRG.6664	762.7861729	1.061224562	0.277163597	3.828874264	0.000128731	0.000690521
MSTRG.17862	194.1729076	1.163570978	0.30411461	3.826093653	0.000130193	0.000697804
MSTRG.12512	189.486866	1.11824892	0.292387291	3.82454694	0.000131013	0.000701637
MSTRG.24881	134.4057788	-1.083773374	0.283644113	-3.820891478	0.00013297	0.00071155
MSTRG.23934	14.76398505	2.897460068	0.758453414	3.82022154	0.000133332	0.000712915
MSTRG.358	68.70004103	1.369366021	0.358478862	3.819935192	0.000133487	0.000713173
MSTRG.20251	49.0487835	-1.57387014	0.412258024	-3.817682249	0.000134711	0.000719141
MSTRG.1840	101.6471849	1.462339771	0.383192531	3.81620113	0.000135522	0.000722892
MSTRG.21807	303.7289288	0.931193322	0.244172861	3.813664292	0.000136921	0.000729775
MSTRG.24949	660.9248891	-1.026505751	0.269214964	-3.812959485	0.000137313	0.000731277
MSTRG.16376	904.3194152	1.563333414	0.410483889	3.808513452	0.000139805	0.000743957
MSTRG.9319	515.1885461	0.924738414	0.243100319	3.80393747	0.000142414	0.00075724
MSTRG.15404	14.48599928	2.851188709	0.749581693	3.803706436	0.000142547	0.000757345
MSTRG.11422	218.479147	1.129416457	0.296976615	3.803048461	0.000142926	0.000758758
MSTRG.18429	647.8416754	1.414265639	0.37190577	3.802752614	0.000143097	0.000759062
MSTRG.18978	265.2032069	-0.950177372	0.250045816	-3.800013082	0.000144688	0.000766895
MSTRG.8214	420.2590459	1.263361051	0.332707319	3.797214481	0.000146331	0.000774987
MSTRG.19996	45.41387358	-1.70535462	0.449142334	-3.796913561	0.000146509	0.000775315
MSTRG.4781	68.23231103	-1.626270807	0.428445343	-3.795748593	0.000147199	0.000778349
MSTRG.22290	14.14418443	2.928360547	0.771635449	3.795005208	0.00014764	0.000780068
MSTRG.14320	1289.141904	0.814273028	0.214695777	3.792683014	0.000149028	0.00078678
MSTRG.20636	265.8863999	-0.868230112	0.228984005	-3.791662705	0.000149642	0.000789397
MSTRG.14298	119.7324527	-1.333339262	0.351747894	-3.790610507	0.000150277	0.000792124
MSTRG.18381	102.0926063	-1.218863543	0.321687185	-3.788971401	0.000151272	0.000796741
MSTRG.17008	77.18029348	-1.488412913	0.393061664	-3.786716055	0.000152651	0.000803371
MSTRG.18522	206.5216009	1.449761104	0.382925784	3.786010667	0.000153085	0.000804388
MSTRG.2629	523.7728621	0.872227426	0.230378754	3.786058435	0.000153056	0.000804388
MSTRG.22154	2513.191254	0.873939924	0.230853561	3.785689595	0.000153283	0.000804795
MSTRG.24281	400.6009948	-1.150247543	0.304023082	-3.783421753	0.000154687	0.00081153
MSTRG.6574	44.15895073	-1.658466243	0.438509759	-3.782050931	0.000155542	0.000815374
MSTRG.4377	7388.025289	0.901390029	0.238413441	3.78078528	0.000156334	0.000818889
MSTRG.23225	34.73272394	-1.870336649	0.495160915	-3.777229974	0.000158582	0.000830013
MSTRG.1318	7.932300246	4.927981789	1.305335111	3.775261807	0.00015984	0.00083594
MSTRG.23291	155.5313491	1.145294277	0.303446832	3.774283188	0.000160468	0.000838573
MSTRG.16960	50.35972205	1.574738988	0.417397487	3.772756278	0.000161454	0.000843065
MSTRG.317	48.60665744	1.507640289	0.399722241	3.7717198	0.000162126	0.000845915
MSTRG.11725	35.09814684	2.385176165	0.632544566	3.770763823	0.000162749	0.000848117
MSTRG.939	245.8928891	1.538487843	0.408013143	3.770682069	0.000162802	0.000848117
MSTRG.19041	543.3410072	-1.102769599	0.292558556	-3.769397878	0.000163642	0.000851829
MSTRG.11172	26.76728752	-2.860957585	0.7595733	-3.766532583	0.00016553	0.00086099
MSTRG.11521	69.11155762	2.232165287	0.592669579	3.766289627	0.000165692	0.000861158
MSTRG.21109	66.0800961	1.603418777	0.426253495	3.761655435	0.000168792	0.000876594
MSTRG.12334	55.27114411	-1.535550695	0.408466367	-3.759307546	0.000170384	0.000884174
MSTRG.14060	34.67795061	-1.886153839	0.501812485	-3.758682567	0.00017081	0.000885698
MSTRG.6627	447.7747012	-0.847481888	0.225649176	-3.755749976	0.000172823	0.000895441
MSTRG.20725	120.9654206	1.546982687	0.412061846	3.754248792	0.000173862	0.000900127
MSTRG.13472	86.8565325	-1.199384669	0.319736215	-3.751169283	0.000176012	0.000910551
MSTRG.4318	51.42739297	-1.399983126	0.373243551	-3.750856838	0.000176231	0.000910982
MSTRG.24192	61.71897289	-1.607835608	0.428820729	-3.749435367	0.000177233	0.000915454
MSTRG.10822	632.6769302	0.912633904	0.243425283	3.749133585	0.000177447	0.000915849
MSTRG.10628	14.66812814	-2.706875089	0.722278593	-3.747688378	0.000178472	0.00092043
MSTRG.21391	2923.67348	0.84085128	0.224391738	3.747247052	0.000178786	0.00092134
MSTRG.12784	70.9959033	-1.490576796	0.3979153	-3.74596502	0.000179702	0.000925346
MSTRG.21733	439.0031548	0.82457989	0.220174898	3.745113083	0.000180313	0.000927777
MSTRG.4713	61.67222331	-1.610064386	0.430142305	-3.743097038	0.000181766	0.000934537
MSTRG.1554	111.672008	-1.375679872	0.367577259	-3.742559803	0.000182155	0.000935819
MSTRG.14151	350.4659365	-0.930373419	0.248610054	-3.742300056	0.000182344	0.000936068
MSTRG.991	30.98174867	-1.818047488	0.486046793	-3.740478316	0.00018367	0.000942156
MSTRG.13105	176.8829042	1.284010943	0.343418705	3.738908003	0.000184821	0.000947333
MSTRG.21385	125.9741786	-1.195070185	0.319648552	-3.738700444	0.000184974	0.00094739
MSTRG.5913	39.2261549	-1.750190111	0.468196992	-3.738148986	0.00018538	0.000948743
MSTRG.18453	74.61309479	2.215857309	0.593235469	3.735207052	0.000187561	0.000958699
MSTRG.8940	20.37409761	-2.280825095	0.610640081	-3.735138204	0.000187612	0.000958699
MSTRG.17480	27.66691079	-1.935176972	0.518489787	-3.73233383	0.000189714	0.000968699
MSTRG.1460	267.3037375	-1.094689112	0.293476531	-3.730073778	0.000191424	0.000976684
MSTRG.407	44.88299609	1.393611707	0.373656887	3.729656151	0.000191741	0.000976814
MSTRG.7167	324.4896529	0.881871755	0.236440337	3.729785562	0.000191643	0.000976814
MSTRG.14237	280.6025094	0.916602262	0.245776745	3.729410051	0.000191929	0.000977025
MSTRG.13086	73.49382627	-1.713310134	0.459507799	-3.72857683	0.000192564	0.000978027
MSTRG.17448	192.9260912	2.081674521	0.558283486	3.728705171	0.000192466	0.000978027
MSTRG.23306	372.6992085	0.913535802	0.245008151	3.728593507	0.000192551	0.000978027
MSTRG.20385	142.1897105	1.136288819	0.304803267	3.727941728	0.00019305	0.000979751
MSTRG.20821	96.45190715	1.21837579	0.326894463	3.727122746	0.000193678	0.000982193
MSTRG.23008	65.98017672	-1.465469991	0.3932471	-3.72658817	0.000194089	0.000982788
MSTRG.2710	19.63990393	-2.233881761	0.599415372	-3.726767554	0.000193951	0.000982788
MSTRG.11413	122.285586	1.052936838	0.282636868	3.725405124	0.000195002	0.000986662
MSTRG.21701	74.12933905	1.190908417	0.319730696	3.724723434	0.000195529	0.000987092
MSTRG.5006	82.82447264	1.366063655	0.366741376	3.724869193	0.000195417	0.000987092
MSTRG.7418	93.94786599	1.585040329	0.425522	3.72493156	0.000195368	0.000987092
MSTRG.22174	185.1757183	1.079095774	0.289815829	3.723384532	0.00019657	0.000991459
MSTRG.5990	99.79295214	-1.15848219	0.311149865	-3.723228967	0.000196691	0.000991459
MSTRG.22338	404.2274396	-1.044978979	0.280762078	-3.721937754	0.0001977	0.000995793
MSTRG.21832	55.72241336	1.338942867	0.359810488	3.721244693	0.000198243	0.000997779
MSTRG.8962	159.4912535	1.077383865	0.289651211	3.719590403	0.000199546	0.001003582
MSTRG.1830	84.71722137	1.717099047	0.461700901	3.719072336	0.000199956	0.001004887
MSTRG.16154	96.26651537	-1.483063727	0.398974653	-3.717187834	0.000201453	0.001011649
MSTRG.5504	205.8575333	-1.658864795	0.446490533	-3.715341477	0.000202929	0.001018301
MSTRG.13821	34.39004602	2.100563245	0.565544105	3.714234178	0.00020382	0.001022003
MSTRG.9747	44.79995095	-1.8224384	0.490733527	-3.713702652	0.000204249	0.001023386
MSTRG.4847	259.5510521	-1.196324193	0.32237451	-3.71097638	0.000206461	0.001033698
MSTRG.124	24.18966821	-2.047560662	0.551961043	-3.709610829	0.000207578	0.001038511
MSTRG.22401	92.33455737	1.107644002	0.298629982	3.709085058	0.00020801	0.001039892
MSTRG.18558	95.455825	1.355084648	0.365473622	3.707749525	0.000209109	0.00104461
MSTRG.14726	97.41253177	-1.223041229	0.329902024	-3.707286224	0.000209492	0.001045741
MSTRG.4225	669.5086206	0.922848545	0.248963674	3.70675983	0.000209928	0.001046654
MSTRG.8430	61.93252112	-1.310054599	0.353430026	-3.706687328	0.000209988	0.001046654
MSTRG.22794	208.9688268	0.879446946	0.237408048	3.704368724	0.000211918	0.001055486
MSTRG.20604	67.46400618	1.431737923	0.386689441	3.702552412	0.000213441	0.001062283
MSTRG.12956	42.71345375	-1.527262302	0.412516098	-3.702309582	0.000213646	0.00106251
MSTRG.10766	362.7893599	1.044220104	0.282127278	3.70123766	0.00021455	0.001066217
MSTRG.2647	12.09091507	-4.778251236	1.291781733	-3.698961762	0.000216483	0.001075023
MSTRG.17682	23.56703085	1.838998932	0.497349532	3.6975986	0.000217649	0.001080009
MSTRG.21854	593.3270493	-1.150020164	0.311095232	-3.696682059	0.000218436	0.00108311
MSTRG.10896	1329.361537	0.981625478	0.265581451	3.696137186	0.000218905	0.001084632
MSTRG.1245	4660.39637	0.793976705	0.214922339	3.694249316	0.000220537	0.001091913
MSTRG.10741	2719.336697	0.99426992	0.269367927	3.691122144	0.000223267	0.001102978
MSTRG.8261	165.0463087	-0.923644602	0.250226564	-3.691233211	0.000223169	0.001102978
MSTRG.8407	32.57661026	1.935980645	0.524449316	3.691454226	0.000222976	0.001102978
MSTRG.23274	3356.958233	0.715721613	0.193916019	3.690884425	0.000223476	0.001103195
MSTRG.1737	47.38753431	1.553176203	0.420848368	3.690583877	0.00022374	0.001103684
MSTRG.23075	13.50620232	-3.273121172	0.886970642	-3.690224925	0.000224056	0.001104429
MSTRG.9168	19.74015295	-2.369522114	0.642215002	-3.689608787	0.000224599	0.001106291
MSTRG.21156	148.5800589	1.011317133	0.274124394	3.689263537	0.000224904	0.001106979
MSTRG.21459	142.1525442	1.029504336	0.279142165	3.688100428	0.000225934	0.001110416
MSTRG.25149	688.2999938	0.876884199	0.237758092	3.688136092	0.000225903	0.001110416
MSTRG.17745	96.82138947	1.236736482	0.335500976	3.686238108	0.000227593	0.001117748
MSTRG.9785	377.6658711	0.917277018	0.249037766	3.683284805	0.000230248	0.001129954
MSTRG.6356	313.5065097	-0.851170001	0.231307942	-3.679813118	0.000233405	0.001144608
MSTRG.12057	33.69906316	-1.860907815	0.505823951	-3.678963426	0.000234184	0.001147587
MSTRG.10857	338.7744154	0.981017978	0.266671183	3.678755107	0.000234375	0.001147683
MSTRG.20167	4701.762558	0.739303592	0.201046121	3.677283545	0.000235731	0.001152635
MSTRG.22425	351.9907273	-0.785977539	0.213728081	-3.67746501	0.000235563	0.001152635
MSTRG.12845	294.5011306	-0.813541363	0.221259298	-3.676868595	0.000236115	0.001152952
MSTRG.5588	37.09142722	-1.923267142	0.523076026	-3.676840548	0.000236141	0.001152952
MSTRG.8959	50.96688297	-1.468271178	0.399557562	-3.67474256	0.000238089	0.001160772
MSTRG.93	20.11479062	-2.848825147	0.775205971	-3.674926733	0.000237918	0.001160772
MSTRG.16605	92.22394727	1.137232235	0.309545253	3.673880391	0.000238895	0.00116385
MSTRG.9231	1936.936399	0.826903308	0.225104557	3.673418788	0.000239327	0.001165107
MSTRG.9221	2028.229263	0.820300649	0.223318949	3.673224563	0.000239509	0.001165145
MSTRG.24023	4331.367702	0.998357614	0.271855193	3.672387501	0.000240295	0.00116812
MSTRG.3731	86.08497436	-1.29029846	0.351488038	-3.670959811	0.000241641	0.001173812
MSTRG.23512	950.2640207	-0.779429552	0.212340121	-3.670665484	0.00024192	0.001174312
MSTRG.15112	32.53566185	-1.980239278	0.539556378	-3.67012486	0.000242432	0.001175945
MSTRG.24874	54.71193783	-1.324796929	0.361025622	-3.669537141	0.00024299	0.001177797
MSTRG.18790	151.5278592	-1.127074318	0.30726385	-3.668099319	0.00024436	0.001183013
MSTRG.8575	41.52685869	-1.454935726	0.396652406	-3.668037067	0.00024442	0.001183013
MSTRG.9216	106.2491938	1.146298273	0.312669812	3.666162291	0.000246218	0.001190853
MSTRG.15466	381.9316982	0.798913933	0.217995463	3.664819085	0.000247513	0.001196256
MSTRG.6445	43.5310872	-1.688042757	0.460734724	-3.663806236	0.000248495	0.001200131
MSTRG.3081	68.62909919	-1.447148139	0.395007926	-3.663592663	0.000248702	0.001200266
MSTRG.10341	23.69159451	-2.010064645	0.5487384	-3.663065398	0.000249215	0.001201517
MSTRG.20317	37.11788894	-1.887578154	0.515329848	-3.662854306	0.00024942	0.001201517
MSTRG.22157	34.34570581	-1.641666922	0.448225912	-3.662588168	0.00024968	0.001201517
MSTRG.24145	11.47967247	3.019754795	0.824481847	3.662609197	0.000249659	0.001201517
MSTRG.3959	484.0066715	-1.193826951	0.326039288	-3.661604585	0.000250641	0.001205273
MSTRG.11049	27.45647594	1.94664077	0.531841441	3.660190087	0.000252028	0.001210206
MSTRG.22000	44.31016566	-1.554297896	0.424631869	-3.66034207	0.000251879	0.001210206
MSTRG.427	124.4249207	1.169004909	0.319404671	3.659949318	0.000252265	0.001210475
MSTRG.18332	46.90453482	1.520281175	0.415537839	3.658586612	0.00025361	0.001216056
MSTRG.7198	366.6716594	1.366787819	0.373610513	3.658322696	0.000253871	0.001216436
MSTRG.22625	449.9963091	0.774546976	0.211862034	3.655902671	0.000256279	0.001227092
MSTRG.22271	226.8647758	-1.419043335	0.388236902	-3.655096478	0.000257085	0.001229195
MSTRG.7044	77.15875151	-1.698519822	0.464688819	-3.655176865	0.000257005	0.001229195
MSTRG.4296	4301.174599	0.668806431	0.182989328	3.654893082	0.000257289	0.001229291
MSTRG.24031	62.04169605	1.346108199	0.368346762	3.654459157	0.000257725	0.001230493
MSTRG.14626	30.93775044	-1.878101778	0.514197668	-3.652489881	0.00025971	0.001239086
MSTRG.7864	134.6719075	1.382697029	0.378608891	3.652045849	0.000260159	0.001240347
MSTRG.5630	63.07559202	-1.253192706	0.343497445	-3.648331958	0.000263948	0.001257515
MSTRG.15087	580.1163899	-0.932530332	0.255638047	-3.647854238	0.00026444	0.001258313
MSTRG.20704	2138.54311	0.890172743	0.244042047	3.647620379	0.00026468	0.001258313
MSTRG.4596	185.0095001	-1.322239986	0.362492667	-3.647632375	0.000264668	0.001258313
MSTRG.8536	967.1355177	0.74947658	0.205593404	3.645431062	0.000266944	0.001268173
MSTRG.1134	34.51406561	-2.226507739	0.611171903	-3.643013899	0.000269464	0.001279238
MSTRG.11399	301.0203165	0.902000646	0.247733653	3.641009745	0.000271571	0.0012865
MSTRG.11462	62.01426201	-1.298379561	0.356584291	-3.641157489	0.000271415	0.0012865
MSTRG.4005	205.4837306	-1.028896223	0.282574849	-3.641145798	0.000271427	0.0012865
MSTRG.20659	92.03363116	1.111733483	0.305455956	3.639586853	0.000273076	0.001291799
MSTRG.9412	52.28561315	-1.421792103	0.390633307	-3.63971038	0.000272945	0.001291799
MSTRG.14149	50.23208719	-1.34660626	0.37032691	-3.636263597	0.000276621	0.001307646
MSTRG.10044	22.07032831	-2.329458353	0.640729103	-3.635636873	0.000277295	0.001309904
MSTRG.20942	1100.217024	1.046605577	0.287976484	3.634343896	0.000278689	0.001315561
MSTRG.11903	128.7342336	-1.081737987	0.297691798	-3.633751393	0.00027933	0.001317658
MSTRG.24138	19.51917127	-2.360526389	0.649682054	-3.633356309	0.000279758	0.001318748
MSTRG.20595	383.7887572	1.152531936	0.317320801	3.632071803	0.000281155	0.001324398
MSTRG.25229	1019.2635	1.289034902	0.354935376	3.631745347	0.000281511	0.001325141
MSTRG.1641	147.2686886	1.432187252	0.394390155	3.631397063	0.000281891	0.001325998
MSTRG.18202	25.55050176	-1.973673913	0.543574498	-3.630917047	0.000282416	0.001327534
MSTRG.13923	445.9989308	-0.911025701	0.251037844	-3.629037301	0.00028448	0.001336297
MSTRG.11478	325.2222408	1.167384422	0.32173256	3.628431088	0.000285149	0.001336791
MSTRG.24470	92.76131122	-1.284569952	0.354032211	-3.628398527	0.000285185	0.001336791
MSTRG.8774	19.67790686	-2.323203434	0.640263276	-3.628512707	0.000285059	0.001336791
MSTRG.21	24.81243028	-3.899789882	1.074969156	-3.627815608	0.000285829	0.001338874
MSTRG.3084	292.1388107	-1.009548733	0.278302893	-3.627517927	0.000286159	0.00133948
MSTRG.4216	107.8566738	-1.076195296	0.296757175	-3.626518195	0.000287269	0.001343734
MSTRG.10747	86.2433383	-1.404817129	0.38764034	-3.624022021	0.000290057	0.001355828
MSTRG.10502	32.11555027	-2.423279717	0.66897912	-3.622354786	0.000291933	0.001363647
MSTRG.439	116.7959939	-1.253275003	0.346142099	-3.620695102	0.000293813	0.001371467
MSTRG.11043	2337.285523	0.943251847	0.260538364	3.620395219	0.000294153	0.001372033
MSTRG.20263	141.2309583	1.159312535	0.320247895	3.620047324	0.000294549	0.001372033
MSTRG.8453	97.80499713	-1.167684564	0.322547013	-3.620199592	0.000294376	0.001372033
MSTRG.10378	75.20543922	1.240277106	0.342689998	3.619239296	0.00029547	0.001374704
MSTRG.570	260.5829422	1.47489885	0.407522505	3.619183807	0.000295534	0.001374704
MSTRG.1628	76.65358605	1.313999184	0.363089061	3.618944561	0.000295807	0.001375019
MSTRG.2881	391.5804074	-1.009033973	0.278897865	-3.617933658	0.000296964	0.001379441
MSTRG.24630	229.7718126	1.3010985	0.359654093	3.617638518	0.000297303	0.001380056
MSTRG.12413	32.55749467	1.560545687	0.431434354	3.617110399	0.00029791	0.001381915
MSTRG.24505	3719.380414	-0.721419569	0.199494467	-3.616238481	0.000298915	0.001385615
MSTRG.16769	89.60545224	1.847798997	0.511139826	3.615055811	0.000300283	0.001390992
MSTRG.18397	266.8635207	-0.966802342	0.267612228	-3.61269868	0.000303027	0.001402731
MSTRG.14908	222.0529245	1.070858524	0.296634601	3.610025664	0.000306167	0.001413924
MSTRG.15247	65.95626002	-1.664984111	0.461201672	-3.610099899	0.000306079	0.001413924
MSTRG.22866	546.5678194	0.977414752	0.270753614	3.6099786	0.000306222	0.001413924
MSTRG.9205	146.2472628	1.049033634	0.290597401	3.609920908	0.00030629	0.001413924
MSTRG.10400	950.2997541	0.880296471	0.243929467	3.608815626	0.000307598	0.001418982
MSTRG.20734	1169.681995	0.894120541	0.247816621	3.607992631	0.000308575	0.001422509
MSTRG.12660	186.923243	1.144247448	0.31737335	3.605367148	0.000311712	0.001435803
MSTRG.20377	1458.088447	0.732417119	0.203154615	3.605220182	0.000311888	0.001435803
MSTRG.10397	20.49398518	2.332460648	0.647085824	3.604561498	0.00031268	0.001438459
MSTRG.10810	134.7862251	-1.218547484	0.338094039	-3.604167313	0.000313155	0.001439653
MSTRG.12397	226.4636055	-0.968781082	0.268822721	-3.603791667	0.000313608	0.001440747
MSTRG.20540	156.2718659	1.169119892	0.324873748	3.598689953	0.000319824	0.001468294
MSTRG.22962	34.14748546	-1.67149576	0.464671529	-3.597155531	0.000321716	0.001475967
MSTRG.16394	350.3687953	1.11301134	0.309432858	3.596939728	0.000321983	0.001476179
MSTRG.12319	10.5733046	-3.487976216	0.969772617	-3.596694889	0.000322286	0.001476556
MSTRG.17225	54.57623409	1.596416178	0.444373316	3.592511343	0.000327506	0.001499446
MSTRG.10270	5.542105328	-5.525696788	1.539286288	-3.589778478	0.000330959	0.001514217
MSTRG.13836	167.2158071	0.90793765	0.252962071	3.58922445	0.000331663	0.001516401
MSTRG.12836	521.5774761	-0.801707168	0.22339969	-3.588667331	0.000332373	0.001518607
MSTRG.16079	51.38215253	-1.45163605	0.404694715	-3.586990379	0.000334517	0.001526318
MSTRG.19878	344.3607382	0.846610057	0.236011185	3.587160746	0.000334298	0.001526318
MSTRG.132	257.7535326	-1.229727849	0.342918478	-3.586064699	0.000335706	0.001530236
MSTRG.21053	408.2797551	-0.931047823	0.259636555	-3.585965868	0.000335833	0.001530236
MSTRG.1607	23.53699134	-1.89065417	0.527503681	-3.584153507	0.000338173	0.001538803
MSTRG.18916	14.5314682	2.992257562	0.834839751	3.584229856	0.000338074	0.001538803
MSTRG.663	214.6054193	1.113078983	0.310590874	3.583746576	0.000338701	0.001540156
MSTRG.21471	478.0806537	-1.051241951	0.293372763	-3.58329772	0.000339284	0.001541758
MSTRG.17165	49.24073815	1.390232817	0.388055693	3.582560033	0.000340243	0.001544849
MSTRG.21059	20.4574986	-2.265367231	0.632356666	-3.582420101	0.000340426	0.001544849
MSTRG.6050	23.55888552	-2.087806638	0.583332898	-3.579099766	0.00034478	0.001563547
MSTRG.1004	40.4290413	2.249932372	0.628782406	3.578236841	0.00034592	0.001567655
MSTRG.9131	72.62709253	1.729227747	0.483577727	3.575904453	0.000349019	0.001580629
MSTRG.4251	413.384631	1.034641922	0.289564062	3.573101982	0.000352777	0.001596568
MSTRG.20450	113.3808052	0.996063961	0.279018615	3.569883538	0.00035714	0.001615219
MSTRG.17242	24.40380705	2.543174689	0.712756989	3.568081027	0.000359605	0.00162527
MSTRG.229	289.6609721	1.306961597	0.366486115	3.566196764	0.000362199	0.001635889
MSTRG.12187	206.4925756	-0.948396092	0.265972146	-3.565772226	0.000362786	0.001637435
MSTRG.4500	2866.855675	0.793051203	0.222433544	3.565339951	0.000363385	0.00163903
MSTRG.11414	347.4280303	0.873640499	0.24514114	3.563826541	0.000365488	0.001646294
MSTRG.15905	279.3068762	1.088373363	0.305391294	3.563865068	0.000365434	0.001646294
MSTRG.500	270.7004439	-0.934061254	0.262157671	-3.562975101	0.000366675	0.001650533
MSTRG.4476	62.00388203	1.324192945	0.371733652	3.562208957	0.000367747	0.001654245
MSTRG.718	449.2265949	1.156308276	0.324659581	3.561602194	0.000368599	0.00165696
MSTRG.3326	178.6339151	1.006361229	0.282753461	3.559147345	0.000372061	0.0016714
MSTRG.19735	70.97244931	-1.2608584	0.354307861	-3.558652064	0.000372763	0.00167343
MSTRG.9299	455.342976	0.82683593	0.232358393	3.558450886	0.000373049	0.001673589
MSTRG.15172	51.0684471	1.495002348	0.420173341	3.558060928	0.000373603	0.00167383
MSTRG.6182	534.6341807	-0.858748123	0.241348865	-3.558119591	0.000373519	0.00167383
MSTRG.18533	2117.353756	1.81955714	0.51167407	3.556086283	0.00037642	0.001685326
MSTRG.9402	61.25326514	-1.481070299	0.416526424	-3.555765528	0.00037688	0.001686255
MSTRG.23692	363.4646344	1.013851617	0.285255375	3.554189354	0.000379146	0.00169526
MSTRG.18840	38.54289904	-2.312007118	0.650562136	-3.553860562	0.00037962	0.001696048
MSTRG.20573	264.223407	-0.903777635	0.254319053	-3.553715788	0.000379829	0.001696048
MSTRG.17550	123.1784774	1.566437195	0.441101729	3.551192596	0.00038349	0.001711249
MSTRG.20727	58.14732583	-1.35313104	0.381092423	-3.550663716	0.000384261	0.001713548
MSTRG.16632	346.6527987	1.224852154	0.345005166	3.550242939	0.000384876	0.001714004
MSTRG.870	111.3292622	1.758555551	0.495312108	3.550398876	0.000384648	0.001714004
MSTRG.21741	2830.992133	1.753655631	0.493984152	3.550024072	0.000385196	0.001714288
MSTRG.13833	332.8903913	1.101880707	0.31043463	3.549477413	0.000385997	0.00171671
MSTRG.1448	351.285828	1.215752347	0.342584759	3.54876367	0.000387044	0.001720225
MSTRG.8555	27.91954657	-1.906991388	0.537446136	-3.548246529	0.000387805	0.001722462
MSTRG.13639	985.2763249	0.790992321	0.223050885	3.546241574	0.000390768	0.00173447
MSTRG.1936	38.59054885	-1.656935426	0.467318364	-3.545624471	0.000391684	0.001737383
MSTRG.14956	55.82172812	-1.487498179	0.419645948	-3.544650401	0.000393134	0.001742294
MSTRG.20121	112.0844655	-1.065510259	0.300606829	-3.54453112	0.000393312	0.001742294
MSTRG.2395	1782.597171	-0.79457725	0.224323241	-3.542108458	0.000396942	0.001757211
MSTRG.2018	127.671793	1.257298453	0.355104434	3.540644198	0.000399151	0.001764717
MSTRG.5744	17.48076804	-2.387892961	0.674425042	-3.540635078	0.000399165	0.001764717
MSTRG.3422	59.8072156	-1.264120298	0.357151738	-3.539448818	0.000400964	0.001771496
MSTRG.18796	102.3900195	-1.516472159	0.428499976	-3.539025076	0.000401608	0.001773171
MSTRG.24670	50.26140874	-1.559333659	0.440637385	-3.538813802	0.000401929	0.00177342
MSTRG.13101	1474.033334	-0.900582861	0.25452065	-3.538348903	0.000402638	0.001775375
MSTRG.19265	323.6082271	-0.936991482	0.264845415	-3.537880704	0.000403352	0.001777354
MSTRG.14257	578.9905704	0.998448998	0.282276133	3.537135734	0.000404492	0.001781202
MSTRG.21599	70.61447319	1.264707405	0.357608265	3.536572078	0.000405356	0.001783833
MSTRG.1735	44.87745327	-1.52255553	0.430540055	-3.536385321	0.000405643	0.001783921
MSTRG.19150	90.17655997	1.864472252	0.527442947	3.53492688	0.000407888	0.00179144
MSTRG.612	63.22231612	-1.255225536	0.355091104	-3.534939407	0.000407869	0.00179144
MSTRG.20817	112.3943932	-1.08565606	0.30735796	-3.532220406	0.000412086	0.001808689
MSTRG.5707	395.9672742	-1.426941655	0.404134991	-3.530854011	0.00041422	0.001816865
MSTRG.11865	1914.866453	1.05942837	0.300127377	3.529929129	0.000415671	0.001820849
MSTRG.6700	148.2187698	-1.265280691	0.358443774	-3.529927939	0.000415673	0.001820849
MSTRG.2632	85.94081514	1.611760724	0.456637246	3.529630443	0.000416141	0.001821704
MSTRG.20487	13.54676594	-2.935856005	0.832047041	-3.528473586	0.000417964	0.001827293
MSTRG.21009	365.8653499	1.064152703	0.301584543	3.528538603	0.000417861	0.001827293
MSTRG.23527	640.7389258	0.737429513	0.209127724	3.526215938	0.000421543	0.001841739
MSTRG.15374	2099.855883	1.009915077	0.286422069	3.525968091	0.000421938	0.00184226
MSTRG.8768	52.63901479	-1.392356435	0.394915458	-3.52570761	0.000422353	0.00184287
MSTRG.16013	59.04735272	-1.421925628	0.403376231	-3.525060524	0.000423386	0.001846173
MSTRG.22468	22.44210762	-2.235137776	0.634436407	-3.523028866	0.000426645	0.001859171
MSTRG.18085	194.8929547	1.037230092	0.294471864	3.522340229	0.000427755	0.001862794
MSTRG.9910	333.4412673	-1.035644986	0.294092713	-3.521491486	0.000429126	0.001867552
MSTRG.19803	5727.674114	0.807643765	0.229367741	3.521174167	0.00042964	0.001868572
MSTRG.23899	22.30313298	-1.956078086	0.555811979	-3.51931617	0.000432661	0.001880486
MSTRG.12250	31.79126728	1.84097004	0.523144679	3.519045716	0.000433102	0.001881182
MSTRG.14764	127.1640246	-1.127068514	0.32042835	-3.517380757	0.000435828	0.001890567
MSTRG.5966	83.6426833	-1.324740029	0.37662376	-3.517409598	0.000435781	0.001890567
MSTRG.2319	831.5553037	-0.991961519	0.282088186	-3.516494369	0.000437286	0.001895661
MSTRG.2976	164.8717059	0.912806618	0.259781325	3.513749945	0.000441829	0.001912874
MSTRG.9256	384.0352206	0.826049986	0.23508006	3.513909195	0.000441564	0.001912874
MSTRG.18362	145.8296952	0.948767609	0.270033951	3.513512302	0.000442224	0.001913348
MSTRG.22156	176.4726229	0.871379609	0.248128636	3.511805905	0.000445073	0.001923187
MSTRG.9691	2823.20758	0.883256177	0.251506024	3.51186887	0.000444967	0.001923187
MSTRG.9223	319.2635337	0.896741662	0.255368374	3.511561153	0.000445483	0.001923716
MSTRG.16904	199.7137326	1.046308647	0.298002547	3.511072833	0.000446302	0.00192601
MSTRG.25176	8.778375727	3.413172657	0.972292122	3.510439487	0.000447367	0.001929359
MSTRG.21213	184.8535124	-1.004944102	0.286297483	-3.510139497	0.000447872	0.001930292
MSTRG.16725	55.2377039	1.298282603	0.369949609	3.509349845	0.000449204	0.001934786
MSTRG.5760	122.2585976	-1.407388395	0.401128623	-3.508571352	0.00045052	0.001939209
MSTRG.10999	875.7381932	0.937211647	0.267189104	3.507671653	0.000452047	0.001944527
MSTRG.20833	318.4097474	0.793175383	0.226220105	3.506210837	0.000454535	0.001953019
MSTRG.5533	224.5192629	-1.240587914	0.353829931	-3.506170069	0.000454605	0.001953019
MSTRG.18404	6360.547926	0.935253177	0.266863391	3.504614005	0.00045727	0.001963207
MSTRG.23377	21.3568171	-2.204648591	0.629791679	-3.500599748	0.000464212	0.001991737
MSTRG.2623	555.5244659	1.29402284	0.369770791	3.499526923	0.000466085	0.001998487
MSTRG.2524	35.05642279	2.013920724	0.575580185	3.498940331	0.000467111	0.002001605
MSTRG.17297	30.65013664	-1.642666338	0.469925442	-3.495589283	0.000473016	0.002025612
MSTRG.2950	420.0670934	0.843042549	0.241467805	3.491324849	0.000480631	0.002056906
MSTRG.5414	46.21329659	-1.434004751	0.410882884	-3.490057162	0.000482917	0.002065367
MSTRG.9560	691.3517492	0.784615757	0.224834357	3.489750257	0.000483472	0.002066419
MSTRG.8663	51.56269614	-1.445963384	0.414532562	-3.488178055	0.000486324	0.002077281
MSTRG.19021	40.81426606	1.988137666	0.570077155	3.487488754	0.000487579	0.002080499
MSTRG.9387	1880.181399	0.832559065	0.238731892	3.487422893	0.0004877	0.002080499
MSTRG.2886	9.053502497	-4.312990321	1.237218931	-3.486036474	0.000490234	0.002089979
MSTRG.5631	148.4601994	-1.058977289	0.30388262	-3.484823476	0.000492462	0.002098138
MSTRG.13252	120.9481026	-1.124705571	0.322771652	-3.484524012	0.000493013	0.002099151
MSTRG.9684	17.79355708	-2.584477176	0.742027496	-3.482993809	0.00049584	0.002109843
MSTRG.22693	517.4133398	-0.998161167	0.286597724	-3.482795162	0.000496208	0.002110066
MSTRG.7667	88.02833601	-1.313816657	0.377251316	-3.482603247	0.000496564	0.002110238
MSTRG.22955	172.6163841	0.973563302	0.279730989	3.48035556	0.000500749	0.002126672
MSTRG.6284	53.45763748	1.363556955	0.391855375	3.479745446	0.00050189	0.002130168
MSTRG.23976	332.4523394	1.099347921	0.315983724	3.479128318	0.000503048	0.002132869
MSTRG.24550	153.4735851	0.901035593	0.258987774	3.479066134	0.000503164	0.002132869
MSTRG.20153	26.91759775	-2.050239014	0.589438002	-3.47829459	0.000504615	0.002137426
MSTRG.7997	137.5290948	1.02571873	0.294903146	3.478154583	0.000504879	0.002137426
MSTRG.10387	118.8363548	-1.166356605	0.335431846	-3.477179102	0.000506719	0.002142506
MSTRG.2590	87.31101754	1.170676763	0.336661925	3.477306686	0.000506478	0.002142506
MSTRG.1195	59.3440203	1.642188222	0.472351814	3.476620971	0.000507775	0.002145614
MSTRG.19270	24.06032454	-2.434842254	0.700827335	-3.474239847	0.000512303	0.00216338
MSTRG.13619	35.80555967	1.518841884	0.437239528	3.473706717	0.000513322	0.002166315
MSTRG.23541	306.7310946	0.807284208	0.232448562	3.47295849	0.000514755	0.002169969
MSTRG.25173	163.3321441	0.943388921	0.271641732	3.472916018	0.000514836	0.002169969
MSTRG.11383	37.14399068	-1.645889525	0.473972657	-3.472541089	0.000515556	0.002171634
MSTRG.5838	54.91941204	1.282539487	0.36944837	3.471498567	0.000517562	0.002177583
MSTRG.9544	26.62181927	2.72043671	0.783655819	3.471468781	0.00051762	0.002177583
MSTRG.18217	24.61127822	-2.384345655	0.687020848	-3.470557931	0.000519378	0.002183609
MSTRG.16838	50.28817784	-1.442039911	0.415663772	-3.469246075	0.000521921	0.002192921
MSTRG.19304	13.07976721	-2.688440508	0.775032308	-3.468810888	0.000522767	0.002195098
MSTRG.14187	66.11619545	-1.669735194	0.481564125	-3.467316411	0.000525683	0.002205955
MSTRG.20802	51.91393592	1.572270945	0.453692427	3.465499643	0.000529247	0.00221952
MSTRG.14380	14.75670416	-2.533737847	0.732044676	-3.461179258	0.000537815	0.002254036
MSTRG.10332	2833.817954	0.695430977	0.200934392	3.460985303	0.000538202	0.002254248
MSTRG.19843	226.7715197	-0.866348672	0.250360868	-3.460399701	0.000539374	0.002257743
MSTRG.875	57.53326463	1.945518333	0.563234956	3.454186058	0.000551956	0.002308966
MSTRG.22086	448.5957225	1.071161036	0.31014341	3.453760426	0.000552828	0.002311168
MSTRG.18486	384.57244	1.095269708	0.317179784	3.453151063	0.000554079	0.002313503
MSTRG.22460	31.34000949	-2.373500606	0.687329417	-3.453221333	0.000553934	0.002313503
MSTRG.20958	37.37032889	1.688982282	0.489151934	3.452878677	0.000554638	0.002314396
MSTRG.24546	104.610958	-1.18078307	0.342144997	-3.451118917	0.000558268	0.002328087
MSTRG.13536	302.6964928	1.421513175	0.412011236	3.450180607	0.000560212	0.002334739
MSTRG.22765	42.02722897	-1.399037555	0.405698565	-3.448465621	0.000563781	0.002348152
MSTRG.1647	22.19225472	-1.931876789	0.560283308	-3.448035597	0.00056468	0.002350431
MSTRG.9983	59.79726831	-1.285643917	0.373384084	-3.443220991	0.000574829	0.00239119
MSTRG.22699	1007.492261	1.146419053	0.333600335	3.436504505	0.000589273	0.002449748
MSTRG.23943	5434.223012	0.819111985	0.238377032	3.436203473	0.000589928	0.002450948
MSTRG.15308	36.96901582	-1.629954755	0.474430484	-3.435602916	0.000591237	0.002454862
MSTRG.13881	151.2594614	-1.091285336	0.317684485	-3.435123169	0.000592285	0.002456865
MSTRG.3073	33.86776473	-1.662644986	0.484024108	-3.435045812	0.000592454	0.002456865
MSTRG.19857	150.1210534	1.012682673	0.294836654	3.434724483	0.000593157	0.002458255
MSTRG.16658	50.51425264	1.620580583	0.471914452	3.434055843	0.000594622	0.002462394
MSTRG.428	21.17377034	-2.069281495	0.60259811	-3.433932931	0.000594891	0.002462394
MSTRG.16313	73.92601758	-1.26953069	0.369771374	-3.433285481	0.000596314	0.002465515
MSTRG.18540	103.2061569	1.61818938	0.47132816	3.433254185	0.000596383	0.002465515
MSTRG.6789	38.07012268	-1.658789211	0.483541385	-3.430501011	0.000602468	0.002489133
MSTRG.20442	5753.043899	0.725937155	0.211803676	3.427405838	0.000609378	0.002516128
MSTRG.22092	51.75261092	-1.342511047	0.391755854	-3.426907433	0.000610497	0.002519195
MSTRG.15578	158.280382	-1.026076611	0.299473495	-3.426268525	0.000611935	0.002523572
MSTRG.15900	73.2921497	1.779706738	0.519738597	3.424234316	0.000616534	0.002540973
MSTRG.12569	8.77220407	-4.293031955	1.254059016	-3.423309351	0.000618636	0.002548065
MSTRG.14695	43.38644779	1.662714928	0.486426509	3.418224328	0.000630311	0.002594555
MSTRG.13584	251.8420206	1.288482716	0.377045256	3.417315812	0.000632419	0.002601629
MSTRG.20825	84.50374052	-1.414332243	0.414163136	-3.414915812	0.000638017	0.002623047
MSTRG.9552	15.94312199	2.595470556	0.760195012	3.414216768	0.000639657	0.002628171
MSTRG.5035	2017.080522	0.741073974	0.217100729	3.413502931	0.000641335	0.002632172
MSTRG.7125	437.005299	0.861366703	0.252343581	3.413467851	0.000641417	0.002632172
MSTRG.23526	76.56355074	1.280840734	0.375269702	3.413120557	0.000642235	0.002633913
MSTRG.9620	37.68397532	1.82279575	0.534364714	3.411145429	0.000646906	0.002651442
MSTRG.12639	33.02183003	1.986405607	0.582444108	3.410465623	0.000648521	0.002656133
MSTRG.3890	25.07514032	1.705109291	0.499983743	3.410329462	0.000648844	0.002656133
MSTRG.19223	16.52941014	-2.890707687	0.848178826	-3.4081347	0.000654086	0.002675952
MSTRG.8562	20.80015294	-2.542717388	0.746766369	-3.404970409	0.000661712	0.002705497
MSTRG.17577	973.4621535	1.156105867	0.339612622	3.404189924	0.000663606	0.002711582
MSTRG.9584	600.6169808	0.747820422	0.219729179	3.403373312	0.000665593	0.00271804
MSTRG.12457	1058.159688	0.758561022	0.222914697	3.402920635	0.000666696	0.002720886
MSTRG.13195	325.1327486	1.758047465	0.516677915	3.402598437	0.000667483	0.002722435
MSTRG.2427	159.5772703	-0.854275495	0.251141838	-3.401565829	0.00067001	0.002731076
MSTRG.12798	134.8691084	-1.130890869	0.332653733	-3.399603724	0.000674836	0.002749072
MSTRG.17683	126.1554976	-1.123434104	0.330483123	-3.399369065	0.000675415	0.002749758
MSTRG.19462	88.4237781	-1.25727841	0.369909868	-3.398877725	0.00067663	0.002753026
MSTRG.16826	13.17038343	-2.762158837	0.812829551	-3.39820179	0.000678304	0.00275816
MSTRG.23320	31.15830239	-1.61667872	0.475933245	-3.396860246	0.000681638	0.002770033
MSTRG.10954	95.15801188	1.173542432	0.345508509	3.396565932	0.000682371	0.00277133
MSTRG.2292	163.3742475	-0.981064176	0.288857912	-3.39635556	0.000682896	0.002771778
MSTRG.15251	85.92136047	1.374047312	0.404811369	3.394290322	0.000688067	0.002787799
MSTRG.20750	381.8609044	1.369516031	0.403497352	3.394114047	0.00068851	0.002787799
MSTRG.22810	27.80689225	1.860702452	0.548163256	3.394431186	0.000687713	0.002787799
MSTRG.22890	351.870693	0.84342887	0.248491162	3.394200679	0.000688292	0.002787799
MSTRG.2646	16.21990423	-3.089707654	0.910453129	-3.393593318	0.000689821	0.002791415
MSTRG.20803	205.452045	0.836333222	0.246477206	3.393146313	0.000690947	0.002794284
MSTRG.12810	4378.07145	0.685541958	0.202169669	3.390923872	0.000696574	0.002815339
MSTRG.3461	55.73948644	-1.216696158	0.358853548	-3.390508923	0.00069763	0.002817902
MSTRG.19372	24.47918798	1.897597099	0.559748131	3.390090995	0.000698694	0.002818797
MSTRG.19974	30.14259299	2.257579416	0.665903086	3.390252222	0.000698283	0.002818797
MSTRG.4233	1177.199915	0.676660675	0.199777336	3.387074272	0.000706423	0.002848258
MSTRG.5523	58.02880924	1.297969923	0.383266725	3.386596949	0.000707653	0.002851499
MSTRG.2688	111.5926104	-1.028577272	0.303791549	-3.385799486	0.000709712	0.002858076
MSTRG.17792	51.84822393	-1.358052254	0.401275229	-3.384341114	0.000713493	0.002869846
MSTRG.20443	504.4887338	0.681023781	0.201227539	3.384346824	0.000713478	0.002869846
MSTRG.436	39.59679529	-1.543652838	0.456181266	-3.383858468	0.000714748	0.002873168
MSTRG.22969	58.70529022	1.341457828	0.396451356	3.383663109	0.000715257	0.002873486
MSTRG.5064	79.62537859	-1.056483833	0.312408938	-3.381733697	0.000720299	0.002892006
MSTRG.2651	227.9283937	0.809310559	0.2393584	3.381166314	0.000721788	0.002896246
MSTRG.3974	152.2108645	1.343791423	0.397588547	3.379854459	0.000725242	0.00290836
MSTRG.4718	793.2627999	-1.005490553	0.297513139	-3.379650912	0.000725779	0.002908771
MSTRG.17892	192.3220141	0.847599937	0.250859658	3.378781362	0.000728079	0.002916239
MSTRG.16535	62.46155134	1.290259914	0.382222189	3.375680298	0.000736334	0.00294754
MSTRG.11261	361.4944708	1.652927354	0.489695113	3.375421381	0.000737027	0.002948551
MSTRG.18610	332.7822846	0.768085135	0.22761766	3.374453172	0.000739625	0.002955407
MSTRG.3898	106.8570914	1.089268751	0.322794198	3.374499165	0.000739501	0.002955407
MSTRG.21258	109.4569023	-1.191634504	0.353327876	-3.372602573	0.000744613	0.002973564
MSTRG.5832	28.00487784	1.816759004	0.538978502	3.370744842	0.000749653	0.002991901
MSTRG.22881	488.001285	0.952849926	0.282813021	3.369186905	0.000753903	0.00300707
MSTRG.10848	258.3206836	-0.924519523	0.274462101	-3.368477908	0.000755845	0.003013018
MSTRG.3356	320.4769898	-0.897976794	0.266838162	-3.365248762	0.000764747	0.003046689
MSTRG.7790	88.57758826	-1.338467164	0.397765379	-3.364966471	0.00076553	0.003047993
MSTRG.18694	1480.931672	-1.054042849	0.313315556	-3.364157402	0.000767777	0.003055124
MSTRG.23738	292.5416863	0.988761857	0.294283118	3.359900034	0.000779707	0.003100748
MSTRG.10272	209.6285467	-0.813871893	0.242294269	-3.359022473	0.000782187	0.003107284
MSTRG.24489	90.01197118	-1.081512058	0.321975382	-3.358989903	0.000782279	0.003107284
MSTRG.909	18.28635699	-2.578467488	0.767862547	-3.357980536	0.000785141	0.003116802
MSTRG.1783	365.6162999	1.045904575	0.311541174	3.357195335	0.000787375	0.003123813
MSTRG.12364	99.22297554	1.145966035	0.34139158	3.356749561	0.000788645	0.003126999
MSTRG.8618	975.4144322	-0.64801401	0.193077701	-3.356234338	0.000790116	0.003130975
MSTRG.6672	9040.418214	0.702743724	0.209472096	3.35483215	0.000794132	0.003145024
MSTRG.19239	14.47600144	-2.5040924	0.746944071	-3.352449662	0.000800998	0.003170341
MSTRG.17044	4239.383286	0.758532519	0.226312511	3.351703871	0.000803159	0.003177013
MSTRG.20873	115.6550851	1.054590854	0.31475496	3.350513848	0.000806618	0.00318881
MSTRG.5402	102.1452181	1.397870134	0.41737787	3.349171662	0.000810536	0.003202406
MSTRG.21847	15.07679688	2.610522717	0.779561227	3.348707744	0.000811894	0.003205879
MSTRG.10869	14.76089498	-2.382760626	0.711629609	-3.348315746	0.000813043	0.003208523
MSTRG.21926	1822.623723	0.77408141	0.231246016	3.347436745	0.000815626	0.003216817
MSTRG.19338	120.3855898	-1.048857754	0.313484726	-3.34580178	0.00082045	0.003233937
MSTRG.21735	178.5707293	1.034545293	0.309239596	3.345448987	0.000821495	0.003236147
MSTRG.14487	1104.380992	-0.785282466	0.234767131	-3.344942124	0.000822997	0.003240159
MSTRG.8521	168.3546104	1.025883849	0.306962861	3.342045506	0.000831634	0.003272236
MSTRG.19256	629.4469633	0.905568499	0.271003383	3.341539462	0.000833152	0.00327262
MSTRG.19570	189.3072111	-0.943896504	0.282453876	-3.341772178	0.000832454	0.00327262
MSTRG.6388	75.73009815	-1.290633797	0.38624112	-3.341523544	0.000833199	0.00327262
MSTRG.879	44.75578189	1.990182765	0.595681276	3.341019512	0.000834714	0.003276643
MSTRG.12134	19.99591664	-2.373284237	0.710471351	-3.340436223	0.000836469	0.003281607
MSTRG.2078	31.75742231	-1.570906913	0.470496092	-3.338830948	0.000841317	0.003298694
MSTRG.16367	136.0055621	-1.062779425	0.318443353	-3.337420665	0.000845599	0.003313538
MSTRG.38	44.33740787	-1.63565715	0.490763752	-3.33288093	0.000859517	0.003366107
MSTRG.19202	32.34725125	-1.649418709	0.495547594	-3.328476876	0.000873223	0.00341778
MSTRG.15820	37.74941934	1.397637883	0.420037334	3.327413468	0.000876562	0.003428844
MSTRG.18822	2083.176344	1.153240577	0.346643502	3.326877815	0.000878249	0.003433434
MSTRG.20393	37.76669576	-1.742426037	0.524329777	-3.323149119	0.000890073	0.003477628
MSTRG.11321	59.11074136	1.590296377	0.478866176	3.320962006	0.000897077	0.003500905
MSTRG.13515	89.64260771	-1.167058102	0.351415139	-3.321023973	0.000896878	0.003500905
MSTRG.7428	40.91933544	1.381937054	0.416743077	3.316040816	0.000913025	0.003561063
MSTRG.1362	134.3984544	1.232578464	0.371728601	3.315802073	0.000913805	0.00356203
MSTRG.20865	1038.101948	0.900265352	0.271561371	3.31514511	0.000915956	0.003568333
MSTRG.5860	14.16493476	-2.491713186	0.751891297	-3.313927422	0.000919954	0.003581823
MSTRG.11877	56.49738136	-1.557575734	0.47005502	-3.313603018	0.000921022	0.003583894
MSTRG.23266	50.9424439	1.368746553	0.413114798	3.313235353	0.000922233	0.003586523
MSTRG.9285	5685.910184	0.796516266	0.240620943	3.310253288	0.000932116	0.003622849
MSTRG.3579	278.3944876	-0.987876967	0.298459915	-3.309915061	0.000933243	0.003625123
MSTRG.10399	78.56492423	-1.073119844	0.324343147	-3.308594162	0.000937656	0.003634118
MSTRG.13325	111.0214148	-1.387778556	0.419440268	-3.308644067	0.000937489	0.003634118
MSTRG.15179	69.96872529	1.518778827	0.459063284	3.308430186	0.000938206	0.003634118
MSTRG.3314	397.191939	0.723641315	0.218727857	3.308409475	0.000938275	0.003634118
MSTRG.7014	21.13296196	-1.924192667	0.581552363	-3.308717821	0.000937242	0.003634118
MSTRG.16594	807.935008	0.859037801	0.260056804	3.303269859	0.000955644	0.003699248
MSTRG.7480	45.50467958	1.328742327	0.402392523	3.302104908	0.000959622	0.003712498
MSTRG.17176	107.1496121	0.935176095	0.283304239	3.300960473	0.000963545	0.003725052
MSTRG.17789	75.77537037	-1.103919977	0.334436728	-3.300833566	0.00096398	0.003725052
MSTRG.5427	128.5651269	1.29216966	0.39157146	3.299958738	0.00096699	0.003734526
MSTRG.20466	26.55352481	-2.568385933	0.778499181	-3.299150461	0.000969779	0.003742975
MSTRG.874	55.7958569	-2.049997203	0.621399481	-3.299000505	0.000970297	0.003742975
MSTRG.6441	4901.654846	-0.669058485	0.202876567	-3.29785985	0.000974247	0.003756047
MSTRG.21441	95.3533596	0.957258038	0.290292401	3.297564922	0.000975271	0.003757828
MSTRG.6591	8748.330224	1.074514703	0.32601183	3.295937769	0.000980937	0.003777484
MSTRG.9437	19.77569679	-2.04116498	0.619549438	-3.294595803	0.000985633	0.003793384
MSTRG.22518	88.13763022	-1.221350921	0.370766409	-3.294125063	0.000987286	0.003797558
MSTRG.12744	156.9342403	0.975228166	0.296100549	3.293570947	0.000989234	0.003802865
MSTRG.2593	253.9372778	0.823725396	0.250122837	3.293283429	0.000990246	0.003804569
MSTRG.16873	71.49315856	1.031885945	0.313350247	3.293075262	0.000990979	0.003805202
MSTRG.1942	2230.341783	-0.824365812	0.250352876	-3.292815422	0.000991896	0.003806535
MSTRG.16346	56.11902909	1.354039705	0.411247817	3.292515239	0.000992955	0.003808416
MSTRG.20677	167.0642341	1.159483748	0.352277946	3.291388973	0.00099694	0.003821507
MSTRG.16748	72.01453626	1.269267289	0.385667632	3.291091037	0.000997996	0.003823365
MSTRG.13453	37.91111637	-1.952322369	0.59338926	-3.290120839	0.001001444	0.003832183
MSTRG.4609	217.2076368	1.013166323	0.307927962	3.290270605	0.001000911	0.003832183
MSTRG.8756	23.27990088	-1.923306182	0.584753451	-3.289089063	0.001005122	0.003844061
MSTRG.23214	52.21167817	1.290319798	0.392416889	3.288135232	0.001008534	0.003854904
MSTRG.20214	42.99026266	-1.399654272	0.425743971	-3.28754925	0.001010635	0.00386073
MSTRG.5539	150.0293382	-1.381023444	0.420334414	-3.285535038	0.001017889	0.00388622
MSTRG.16391	129.1298377	-0.943993776	0.287390898	-3.284703108	0.001020899	0.003889745
MSTRG.18489	18.07394957	-2.067577237	0.629450506	-3.284733618	0.001020788	0.003889745
MSTRG.22360	15.86882617	-2.204232735	0.671101598	-3.284499308	0.001021637	0.003889745
MSTRG.22965	38.76430284	1.441429418	0.438861215	3.284476661	0.00102172	0.003889745
MSTRG.25020	947.2611289	1.066143879	0.324546651	3.28502505	0.001019733	0.003889745
MSTRG.23825	31.69084855	-1.606253065	0.489124598	-3.283934342	0.001023688	0.003895021
MSTRG.4306	2275.566254	-1.187438821	0.361635613	-3.283522915	0.001025183	0.003898493
MSTRG.14712	31.86994414	-2.047546722	0.623680732	-3.283004614	0.00102707	0.003903449
MSTRG.11015	51.91067156	1.538062782	0.468819161	3.280716554	0.001035437	0.003928181
MSTRG.12315	183.0159807	-0.865058653	0.263678953	-3.280726969	0.001035399	0.003928181
MSTRG.18319	169.7338379	0.852790008	0.25995839	3.280486571	0.001036282	0.003928181
MSTRG.20762	2640.473544	0.597167641	0.182048666	3.280263762	0.001037101	0.003928181
MSTRG.23854	27.17704427	1.494880883	0.455698992	3.280412967	0.001036552	0.003928181
MSTRG.4127	143.5480415	1.263407537	0.385083227	3.280868782	0.001034879	0.003928181
MSTRG.10131	11.85099329	-2.770393552	0.844749113	-3.279545974	0.001039743	0.003932
MSTRG.13882	25.10559475	-2.135831477	0.65126528	-3.279510736	0.001039873	0.003932
MSTRG.5521	85.37266453	-1.105137069	0.336972545	-3.279605668	0.001039523	0.003932
MSTRG.16272	42.75703346	-1.386243121	0.422782423	-3.27885703	0.001042284	0.003938892
MSTRG.17080	90.99651974	-1.416911401	0.43233161	-3.277371741	0.001047783	0.003957438
MSTRG.10109	237.0981738	1.19962438	0.36629108	3.27505758	0.001056404	0.003987748
MSTRG.8173	64.26184492	1.657486626	0.506134325	3.274795924	0.001057383	0.003989192
MSTRG.12222	47.60396644	-1.638999694	0.500950114	-3.271782252	0.001068719	0.004029683
MSTRG.21047	32.29238886	-1.569822327	0.479945986	-3.270831242	0.001072319	0.004040981
MSTRG.8857	26.26922879	-1.60727638	0.491672516	-3.268997812	0.001079291	0.004064966
MSTRG.18523	78.22624684	1.115593708	0.341316446	3.268502647	0.001081182	0.004069794
MSTRG.3336	170.964107	1.102915021	0.337523181	3.267671917	0.00108436	0.004079462
MSTRG.15623	143.7676602	-1.500043479	0.459646925	-3.263468976	0.001100572	0.004135802
MSTRG.16010	100.3008235	0.962097089	0.294807298	3.263477861	0.001100538	0.004135802
MSTRG.14291	105.0923018	0.939845669	0.288130145	3.261879	0.001106764	0.004156734
MSTRG.17328	1104.528934	1.06344563	0.326229281	3.259810484	0.001114867	0.004184817
MSTRG.8218	29.30704221	-1.521337498	0.466970446	-3.25788818	0.001122446	0.004210905
MSTRG.10898	83.48413287	1.105382063	0.339459894	3.256296497	0.001128758	0.00423221
MSTRG.12310	22.59942915	-1.908968062	0.586329579	-3.25579355	0.001130759	0.004237339
MSTRG.16538	74.94742164	-1.217854749	0.374168294	-3.254831496	0.001134597	0.004249337
MSTRG.11004	57.34875881	2.263359679	0.6954958	3.254311068	0.001136677	0.004253559
MSTRG.2135	544.212002	-0.850296553	0.261289507	-3.254231533	0.001136996	0.004253559
MSTRG.5025	45.62360375	-1.350494049	0.415178015	-3.252807229	0.00114271	0.004272547
MSTRG.11963	8.42377724	-4.176885049	1.285347286	-3.249615955	0.00115561	0.004318364
MSTRG.14475	41.73608534	-1.627858884	0.501108685	-3.248514612	0.001160093	0.004332696
MSTRG.600	530.2935657	0.858312791	0.264295272	3.247552578	0.001164022	0.004344944
MSTRG.4240	24.24573125	-1.717201202	0.529125879	-3.245354785	0.001173044	0.004376179
MSTRG.10590	24.99280201	-1.642821941	0.506478092	-3.243618956	0.001180215	0.004390689
MSTRG.13019	88.17748301	-1.116420491	0.344133557	-3.244148875	0.001178022	0.004390689
MSTRG.1492	41.3858545	1.541215835	0.47513275	3.243758372	0.001179638	0.004390689
MSTRG.15421	42.0915567	2.563998602	0.790468117	3.243645817	0.001180104	0.004390689
MSTRG.15583	31.0481808	1.825656719	0.562840907	3.243646107	0.001180103	0.004390689
MSTRG.9856	114.6665976	1.431235888	0.441323022	3.243057392	0.001182544	0.004396907
MSTRG.8706	192.8651243	-0.880936649	0.271717173	-3.242108846	0.001186487	0.004409117
MSTRG.19089	22.62949521	-1.73650291	0.535817452	-3.240847983	0.001191747	0.004424722
MSTRG.2244	80.09232145	-1.238474752	0.382152669	-3.240785303	0.001192009	0.004424722
MSTRG.21196	60.32814534	-1.219963917	0.376548927	-3.239854981	0.001195905	0.004436722
MSTRG.14938	691.7865936	-0.822392746	0.253879282	-3.239306257	0.001198208	0.004442803
MSTRG.2789	1423.451426	-0.807080762	0.249354149	-3.236684709	0.001209269	0.004481331
MSTRG.8885	51.50398106	1.815655391	0.561229081	3.235141324	0.001215825	0.004503132
MSTRG.15796	520.9554757	1.15947127	0.358521284	3.234037478	0.001220534	0.004518071
MSTRG.16987	89.38685088	-1.137289755	0.351941851	-3.231470628	0.00123155	0.004556326
MSTRG.2649	6767.237807	0.687349526	0.212744825	3.230863664	0.001234168	0.004563488
MSTRG.11262	69.02081122	1.113832946	0.344826553	3.23012522	0.00123736	0.004572763
MSTRG.5957	16.72653653	-2.33360749	0.722729291	-3.228881848	0.001242752	0.004590155
MSTRG.21792	119.5762604	-1.392306378	0.431268694	-3.228396585	0.001244863	0.004595412
MSTRG.21597	50.96474516	-1.263053578	0.391269572	-3.228090471	0.001246196	0.004597795
MSTRG.20860	4230.026895	0.7669838	0.237719012	3.226430207	0.001253448	0.004622003
MSTRG.11574	35.491847	-1.608879251	0.498719076	-3.226023085	0.001255232	0.004626033
MSTRG.3955	145.5782936	-4.193207753	1.300167583	-3.225128673	0.001259161	0.004637954
MSTRG.9069	78.94772232	-1.10192455	0.342028765	-3.221730631	0.001274189	0.004690725
MSTRG.19042	959.5313353	-0.831040486	0.257982296	-3.221308204	0.001276068	0.00469248
MSTRG.24738	52.98689599	1.660138761	0.515339117	3.22144915	0.001275441	0.00469248
MSTRG.21234	1935.472235	0.680367484	0.211332759	3.219413252	0.001284532	0.004721009
MSTRG.10952	53.99088661	1.203761547	0.373963729	3.218925938	0.001286717	0.004726442
MSTRG.22795	91.55616443	1.618219654	0.502817632	3.218303319	0.001289514	0.004734115
MSTRG.5692	47.77599255	-1.190627759	0.370115528	-3.216908425	0.0012958	0.004754582
MSTRG.24256	28.80703836	1.851897572	0.576110588	3.21448279	0.001306797	0.004792307
MSTRG.19828	166.7411421	1.530712881	0.476300358	3.213755469	0.001310112	0.00480129
MSTRG.2428	82.16040803	-1.629132834	0.506944671	-3.213630456	0.001310682	0.00480129
MSTRG.5029	223.0219694	-0.771916565	0.240274493	-3.212644657	0.001315189	0.004815161
MSTRG.7793	166.2233837	-1.009495032	0.314402654	-3.210834955	0.001323499	0.004842936
MSTRG.6558	140.0672511	-1.470745355	0.458214338	-3.209732284	0.001328587	0.004858893
MSTRG.8513	52.49014079	-1.263584291	0.393768333	-3.208953551	0.00133219	0.00486941
MSTRG.14008	385.6411847	-1.042715461	0.325208234	-3.206300925	0.001344533	0.004911841
MSTRG.2945	212.971352	-0.815002432	0.254262402	-3.205359604	0.001348938	0.004925245
MSTRG.1645	17.84825367	-2.302722827	0.718670274	-3.204143696	0.001354648	0.004943395
MSTRG.16446	37.70729602	-1.349664301	0.42133387	-3.203313088	0.001358562	0.004954973
MSTRG.4100	20.92942433	-2.776165032	0.867076089	-3.201754802	0.001365932	0.004979139
MSTRG.2788	53.25126743	-1.517490018	0.473990067	-3.201522826	0.001367032	0.004980436
MSTRG.19113	861.4866138	0.914005599	0.285532535	3.201055875	0.00136925	0.004985798
MSTRG.18884	78.27264903	1.05532163	0.329899115	3.198922281	0.001379424	0.005020111
MSTRG.19702	500.6368411	-0.670015003	0.209503936	-3.198102217	0.001383352	0.005031672
MSTRG.8601	278.273365	1.073626266	0.33612724	3.194106691	0.001402643	0.005099064
MSTRG.20310	69.51448566	1.020268274	0.319461447	3.193713306	0.001404555	0.005103243
MSTRG.8445	41.75688459	-1.556603492	0.487564738	-3.192608839	0.001409938	0.005120019
MSTRG.11330	113.860616	1.044119607	0.327152597	3.191536961	0.00141518	0.005136267
MSTRG.4670	157.5600462	-1.028413457	0.322288338	-3.190973225	0.001417944	0.005143508
MSTRG.2336	405.3580167	0.839071801	0.263092614	3.189263991	0.001426356	0.005171215
MSTRG.2357	663.0402022	0.808281612	0.253500119	3.18848613	0.001430199	0.00518234
MSTRG.14445	29.02059833	-1.597709315	0.50145798	-3.186128008	0.001441908	0.005221939
MSTRG.22178	895.2659129	0.912125252	0.286424455	3.184522957	0.001449928	0.005248143
MSTRG.2612	92.52982817	-1.47116679	0.462032518	-3.184119583	0.00145195	0.00525262
MSTRG.24455	43.51450207	-1.272736841	0.399741378	-3.183900674	0.001453049	0.005253753
MSTRG.1680	173.6634195	-0.953021501	0.299349345	-3.18364318	0.001454342	0.005255587
MSTRG.9107	881.3908815	-0.652328504	0.204923613	-3.183276422	0.001456185	0.005259408
MSTRG.3181	35.71721345	-1.636458811	0.514183297	-3.182637051	0.001459404	0.00526819
MSTRG.20584	10.54751299	-2.840407976	0.892702371	-3.181808481	0.001463586	0.005277587
MSTRG.7578	871.0703177	-1.018134759	0.319972486	-3.181944712	0.001462897	0.005277587
MSTRG.15060	138.2877268	-1.12913255	0.355063252	-3.180088456	0.001472301	0.005306154
MSTRG.4208	134.4022412	0.885707276	0.278569054	3.179489121	0.001475349	0.005314276
MSTRG.2034	63.01791509	1.28198494	0.403247136	3.179154484	0.001477053	0.005317551
MSTRG.18917	386.6650582	1.265932221	0.398251662	3.178724263	0.001479247	0.005322585
MSTRG.2750	210.5249138	0.812406526	0.255619982	3.17818082	0.001482023	0.005326841
MSTRG.4566	101.4095071	-1.064755372	0.335009561	-3.178283533	0.001481498	0.005326841
MSTRG.15353	126.842744	1.374470558	0.432768563	3.175994459	0.001493238	0.005364269
MSTRG.2586	38.76344642	1.353425619	0.426164203	3.175831308	0.001494078	0.005364406
MSTRG.8049	97.85164124	-1.068783342	0.336597266	-3.175258531	0.001497031	0.005372123
MSTRG.22695	886.8689223	-0.626650775	0.197379661	-3.174849789	0.001499141	0.005376811
MSTRG.15720	71.74905256	-1.255590332	0.395958588	-3.171014271	0.001519077	0.005445394
MSTRG.13890	4359.373913	-0.707130135	0.223113851	-3.169369058	0.001527703	0.005470452
MSTRG.2285	91.86096883	-0.992074487	0.313006259	-3.169503673	0.001526995	0.005470452
MSTRG.24234	230.011731	1.510633098	0.476669372	3.169142358	0.001528895	0.005471791
MSTRG.17801	377.8949449	0.816736442	0.257765889	3.168520262	0.001532171	0.005480583
MSTRG.9851	83.09064852	-1.137394839	0.359427632	-3.164461324	0.001553703	0.005554634
MSTRG.13706	24.09175936	-1.769622351	0.559274817	-3.164137372	0.001555434	0.00555785
MSTRG.21932	60.24396894	1.05906071	0.334726126	3.1639619	0.001556372	0.005558233
MSTRG.14353	60.01098153	-1.509348833	0.477085561	-3.16368584	0.001557849	0.005560538
MSTRG.5167	38.96289783	-1.292523553	0.408839736	-3.161443082	0.001569895	0.005600548
MSTRG.2942	118.0559697	-0.975159348	0.308602347	-3.159922006	0.001578114	0.005626867
MSTRG.11245	1101.61167	0.809425568	0.256263118	3.158572233	0.00158544	0.005649978
MSTRG.11094	777.6044915	0.93624056	0.296585815	3.156727372	0.001595504	0.005681845
MSTRG.808	4941.877645	0.968345674	0.306766437	3.156621964	0.001596081	0.005681845
MSTRG.22672	743.4779112	0.928669843	0.294337385	3.155120248	0.00160432	0.005708135
MSTRG.23308	45.44167594	-1.41783139	0.449527492	-3.154048231	0.001610225	0.005726099
MSTRG.1313	61.77979968	-1.331423322	0.42217338	-3.15373585	0.001611949	0.005729186
MSTRG.18127	475.8204282	-0.779935226	0.247355268	-3.153097296	0.00161548	0.005738684
MSTRG.16043	10.21139866	-3.069200863	0.973490088	-3.152780807	0.001617232	0.00574186
MSTRG.2368	246.4112488	-0.983564776	0.312003007	-3.152420826	0.001619227	0.005745895
MSTRG.12492	49.79440462	-1.185354817	0.376210036	-3.150779365	0.001628354	0.005775219
MSTRG.17575	131.0841931	0.995550288	0.316231857	3.148165704	0.001642985	0.005820937
MSTRG.7803	22.21249497	-1.8257072	0.579900054	-3.148313556	0.001642154	0.005820937
MSTRG.21660	63.6833214	-1.091504525	0.346842169	-3.146977566	0.001649676	0.005841548
MSTRG.20141	14.15789428	2.210489912	0.70297713	3.144469167	0.001663884	0.005888742
MSTRG.17056	16.90962079	-2.266757509	0.720974462	-3.144019141	0.001666445	0.005894687
MSTRG.9311	1184.856533	-0.795447202	0.253087069	-3.142978438	0.001672382	0.005912558
MSTRG.22469	428.6596238	1.272856745	0.405073488	3.142285988	0.001676342	0.00592343
MSTRG.4645	78.52960369	-1.061436573	0.337902791	-3.141248316	0.001682293	0.00594132
MSTRG.20519	161.5322263	-0.907563446	0.288953288	-3.140865607	0.001684493	0.00594595
MSTRG.5927	28.79053296	-1.625826901	0.517708344	-3.140430167	0.001686999	0.005951655
MSTRG.12857	2170.568755	0.778733143	0.247988084	3.140203882	0.001688303	0.005953115
MSTRG.4519	2470.640811	1.00464375	0.319993492	3.139575573	0.001691928	0.005962752
MSTRG.20556	792.6110763	0.79382744	0.253002312	3.137629192	0.001703202	0.005999325
MSTRG.15857	104.6032913	1.097579369	0.3498944	3.136887496	0.001707516	0.006011356
MSTRG.6137	138.4298716	-0.937044	0.298738951	-3.136664959	0.001708813	0.006012756
MSTRG.14235	120.347849	1.030609466	0.328674642	3.135652509	0.001714722	0.00602686
MSTRG.14404	46.52238237	-1.484991204	0.473595843	-3.135566385	0.001715226	0.00602686
MSTRG.14899	61.54850873	1.017368696	0.324466177	3.135515406	0.001715524	0.00602686
MSTRG.9098	884.9739071	0.836039362	0.266665237	3.135164414	0.001717578	0.006030908
MSTRG.20835	210.6090298	-0.752848215	0.240142482	-3.13500639	0.001718504	0.006030992
MSTRG.3217	86.81377907	1.061656975	0.338828348	3.13331804	0.00172842	0.006062614
MSTRG.17926	29.66646141	-2.080759213	0.664231265	-3.132582464	0.001732757	0.006074641
MSTRG.20583	168.6494946	0.754834643	0.241246515	3.128893458	0.001754659	0.006148201
MSTRG.23260	30.47223073	-1.767767004	0.565343993	-3.126887395	0.001766676	0.006187065
MSTRG.7657	245.7861295	-0.754089831	0.241177562	-3.126699789	0.001767803	0.006187775
MSTRG.8934	104.7717695	0.851722359	0.272434985	3.126332543	0.001770013	0.006192267
MSTRG.11346	238.0110409	-0.886230091	0.283515061	-3.125866006	0.001772823	0.006198857
MSTRG.19897	121.0845249	-1.281846522	0.410261784	-3.124459969	0.001781318	0.006225305
MSTRG.2571	275.8652293	-1.091307618	0.349417076	-3.123223483	0.001788819	0.006248255
MSTRG.22928	31.52202991	1.437534412	0.460392957	3.122407481	0.001793785	0.006262331
MSTRG.21653	163.8072164	0.900512194	0.288437116	3.12203993	0.001796026	0.006266884
MSTRG.5502	277.6021082	-0.7516024	0.240782328	-3.121501514	0.001799313	0.006275081
MSTRG.2490	552.0731	-0.668299731	0.214184264	-3.12020929	0.001807226	0.006299392
MSTRG.10266	131.0228486	-1.204514231	0.386181715	-3.119034863	0.001814445	0.006321261
MSTRG.1223	137.189658	1.121582232	0.359621324	3.118786782	0.001815973	0.006323292
MSTRG.23312	352.014153	0.901932062	0.289271376	3.117944389	0.001821172	0.006338094
MSTRG.15599	30.06112842	-1.479029886	0.474475847	-3.117186881	0.001825858	0.006351099
MSTRG.23723	169.168475	0.912674559	0.292802675	3.117029446	0.001826833	0.006351189
MSTRG.24081	2775.054971	0.619812153	0.198989166	3.114803509	0.001840675	0.006395986
MSTRG.12117	461.253701	-0.6514732	0.209191871	-3.114237639	0.001844209	0.00639918
MSTRG.2200	78.44722004	-1.366001947	0.438636994	-3.114196853	0.001844464	0.00639918
MSTRG.7321	156.815574	-0.957178893	0.307341939	-3.114377742	0.001843333	0.00639918
MSTRG.926	67.85599228	1.111990184	0.357288823	3.112300506	0.001856354	0.006437094
MSTRG.23521	38.2516725	-1.492785921	0.479856992	-3.110897509	0.001865197	0.006464404
MSTRG.2784	11.32402033	-2.478084433	0.797015345	-3.109205424	0.001875912	0.006498176
MSTRG.13314	296.1769264	0.956031162	0.307585958	3.108175575	0.001882462	0.006517489
MSTRG.1208	48.17911484	-1.258640444	0.404974164	-3.107952448	0.001883884	0.006519037
MSTRG.5855	53.06927013	-1.645703844	0.529609906	-3.107388714	0.00188748	0.006526558
MSTRG.603	28.08672689	-1.570876038	0.505542758	-3.107305986	0.001888009	0.006526558
MSTRG.7676	1016.171072	0.699876634	0.225563328	3.10279441	0.001917028	0.006623449
MSTRG.18547	212.105876	0.921267824	0.297085197	3.101022304	0.001928538	0.006659777
MSTRG.13904	61.84373434	-1.177703775	0.379997631	-3.099239781	0.001940179	0.006696522
MSTRG.18074	27.69797934	1.894836917	0.611484271	3.098750051	0.001943389	0.006704141
MSTRG.13265	19.80873261	-1.853339052	0.598182434	-3.098283976	0.001946448	0.006711233
MSTRG.17644	2343.809916	-0.639319746	0.206367634	-3.097965186	0.001948543	0.006714995
MSTRG.15719	33.20158616	-1.344113147	0.433909474	-3.097681033	0.001950412	0.006717975
MSTRG.5370	343.1321608	-0.709996733	0.229238087	-3.097202314	0.001953565	0.006725371
MSTRG.12416	99.69223811	1.172624788	0.378771142	3.095866233	0.001962389	0.006748801
MSTRG.20389	36.13147294	1.534398213	0.495618819	3.095924034	0.001962006	0.006748801
MSTRG.14211	3060.281791	0.86391034	0.279109839	3.095234275	0.001966575	0.006759723
MSTRG.21755	76.3716187	1.034396446	0.3342126	3.09502528	0.001967961	0.006761013
MSTRG.17573	5833.999173	0.822651596	0.265900552	3.093831848	0.001975894	0.006784783
MSTRG.11638	19.04743126	-2.116919929	0.684377452	-3.09320525	0.001980071	0.006795637
MSTRG.23236	8.241593488	-3.093287377	1.000777983	-3.090882722	0.001995624	0.006845503
MSTRG.2927	34.66396582	-1.299573846	0.420486382	-3.090644315	0.001997227	0.00684749
MSTRG.11273	12.2958231	-2.814451159	0.910780133	-3.090154317	0.002000525	0.006851892
MSTRG.15392	41.61318615	-1.288482742	0.416964579	-3.090149159	0.00200056	0.006851892
MSTRG.10897	3781.116184	0.821069517	0.265783968	3.089236432	0.002006717	0.006869462
MSTRG.20876	23.98580033	1.880170205	0.609351908	3.085524441	0.002031935	0.006948678
MSTRG.24358	416.5438444	0.840519351	0.272406662	3.08553155	0.002031887	0.006948678
MSTRG.12804	79.70324012	-1.109501015	0.35968039	-3.084685865	0.002037672	0.006964737
MSTRG.22675	140.5502316	0.781196095	0.253335896	3.083637606	0.002044865	0.006982186
MSTRG.22885	111.4363969	1.170834796	0.379684863	3.083701538	0.002044426	0.006982186
MSTRG.14658	68.42417455	-1.095085136	0.355285742	-3.082265924	0.002054312	0.007010865
MSTRG.8637	43.18086363	-1.236753966	0.401296523	-3.081895542	0.00205687	0.007016014
MSTRG.7331	19.44315239	-2.078717061	0.675093373	-3.079154892	0.002075887	0.007077273
MSTRG.24459	294.4829608	1.11480187	0.362181825	3.07801715	0.002083829	0.007097505
MSTRG.8942	57.62125521	-1.371670691	0.445636887	-3.07800079	0.002083944	0.007097505
MSTRG.11200	44.63034326	1.257234668	0.408620019	3.076781873	0.002092484	0.007122963
MSTRG.7727	31.70800902	-1.355990229	0.440800839	-3.076197022	0.002096593	0.00713332
MSTRG.23921	1375.084491	0.647921263	0.210637842	3.075996485	0.002098003	0.007134491
MSTRG.5288	60.34676094	1.275202079	0.414841346	3.073951263	0.002112439	0.007179932
MSTRG.8212	10.21089665	-2.785620476	0.906634349	-3.07248504	0.002122845	0.007211635
MSTRG.12349	30.38881173	1.430108012	0.465572434	3.071719686	0.002128295	0.007226479
MSTRG.5683	206.5642657	1.064004783	0.346449411	3.071169267	0.002132222	0.007236142
MSTRG.1373	79.34234816	1.020393825	0.332321923	3.070498076	0.002137021	0.007248748
MSTRG.17769	206.4697335	0.870600036	0.283600762	3.069808524	0.00214196	0.007261821
MSTRG.22316	18.38476764	-1.907483662	0.621493448	-3.069193516	0.002146375	0.007273102
MSTRG.11510	1317.917324	0.63568082	0.207150286	3.068693912	0.002149967	0.007281586
MSTRG.7442	68.38964337	-1.286646519	0.41943118	-3.067598644	0.002157862	0.007304626
MSTRG.22239	1385.843593	-0.612254843	0.199627995	-3.066978878	0.002162341	0.007316086
MSTRG.19243	73.6283868	-1.11754837	0.36441932	-3.066655115	0.002164685	0.007320311
MSTRG.1361	24.56702477	2.213459978	0.722294785	3.064482846	0.002180467	0.007369956
MSTRG.14334	126.24064	0.887227271	0.289555206	3.064104024	0.00218323	0.007375568
MSTRG.8465	262.6953851	0.881280436	0.287635234	3.063882071	0.00218485	0.007377316
MSTRG.24083	96.14103882	1.247443155	0.407386832	3.062060574	0.00219819	0.007418613
MSTRG.15802	83.58182077	-1.065839218	0.348153582	-3.061405292	0.002203007	0.007431121
MSTRG.20562	6476.951573	0.90215696	0.294742079	3.060835304	0.002207205	0.007441528
MSTRG.17808	116.0647516	1.372419224	0.448438841	3.060437895	0.002210136	0.007443664
MSTRG.18894	5158.281329	1.019281086	0.333066076	3.060296916	0.002211177	0.007443664
MSTRG.21961	52.9214481	-1.222823444	0.399542334	-3.060560393	0.002209232	0.007443664
MSTRG.1436	679.6378532	0.905872235	0.296078205	3.059570813	0.002216544	0.007450483
MSTRG.18973	365.9561136	1.112799872	0.363696663	3.059692283	0.002215645	0.007450483
MSTRG.23555	883.4776999	0.812932874	0.265683878	3.059774951	0.002215034	0.007450483
MSTRG.8305	1511.616753	0.920510015	0.300885219	3.059339435	0.002218257	0.007452495
MSTRG.23445	31.65244556	-1.398206997	0.457165741	-3.058424704	0.00222504	0.007471532
MSTRG.9301	740.4176045	-0.665209166	0.217513127	-3.058248373	0.00222635	0.007472179
MSTRG.18900	2860.271708	1.195341065	0.391089175	3.056441193	0.002239814	0.007513599
MSTRG.5907	66.3258199	1.155183627	0.377997678	3.056060111	0.002242663	0.007519385
MSTRG.17781	9.086132365	-2.859834762	0.936273014	-3.05448808	0.00225445	0.007555117
MSTRG.13540	30.60751535	1.428090343	0.467633291	3.053867997	0.002259115	0.007566959
MSTRG.2778	36.2329458	-1.418855104	0.46469506	-3.05330361	0.002263368	0.007577412
MSTRG.9097	45.90505829	-1.375190663	0.450916543	-3.049767602	0.002290185	0.007663356
[truncated: 942 more rows]
