# Supplementary material for: Genome-Wide Network of lncRNA–mRNA During Ovine Oocyte Development From Germinal Vesicle to Metaphase II in vitro
Source: Front Physiol. 2020 Aug 18;11:1019. doi: 10.3389/fphys.2020.01019 (PMC7461901; doi:10.3389/fphys.2020.01019)
Supplement: TABLE S5 — Classes of lncRNAs for co-location. [file Data_Sheet_3.CSV]

lnc	rna	r	pvalue
MSTRG.10257	ENSOARG00000022982	-0.95035945	0.003635115
MSTRG.10332	ENSOARG00000022982	0.950447795	0.003622296
MSTRG.1049	ENSOARG00000022982	0.946061322	0.004285607
MSTRG.10567	ENSOARG00000022982	0.946802015	0.004169763
MSTRG.10658	ENSOARG00000022982	-0.920681562	0.009187609
MSTRG.10953	ENSOARG00000022982	-0.93605245	0.006003184
MSTRG.10990	ENSOARG00000022982	0.970384172	0.001302658
MSTRG.11000	ENSOARG00000022982	-0.947792173	0.004017336
MSTRG.11043	ENSOARG00000022982	0.948954194	0.003842007
MSTRG.11144	ENSOARG00000022982	-0.965095884	0.001806184
MSTRG.11156	ENSOARG00000022982	-0.940198457	0.005257405
MSTRG.11287	ENSOARG00000022982	0.932041512	0.006770606
MSTRG.11305	ENSOARG00000022982	-0.919763917	0.009398471
MSTRG.11324	ENSOARG00000022982	0.917460108	0.009938085
MSTRG.11368	ENSOARG00000022982	-0.924780581	0.008274147
MSTRG.11414	ENSOARG00000022982	0.952729383	0.003298954
MSTRG.11473	ENSOARG00000022982	0.925382732	0.00814388
MSTRG.11645	ENSOARG00000022982	0.955364219	0.002944064
MSTRG.11975	ENSOARG00000022982	-0.933203255	0.006543691
MSTRG.12136	ENSOARG00000022982	0.933505462	0.006485282
MSTRG.12213	ENSOARG00000022982	-0.92916007	0.007349696
MSTRG.12304	ENSOARG00000022982	-0.931504636	0.006876745
MSTRG.12308	ENSOARG00000022982	-0.939619853	0.005358577
MSTRG.12407	ENSOARG00000022982	0.983602042	0.000401135
MSTRG.12444	ENSOARG00000022982	-0.968588973	0.001464483
MSTRG.12692	ENSOARG00000022982	-0.925056544	0.008214322
MSTRG.13019	ENSOARG00000022982	-0.92510842	0.008203099
MSTRG.13105	ENSOARG00000022982	0.929337315	0.007313406
MSTRG.13151	ENSOARG00000022982	0.979326099	0.000636697
MSTRG.13286	ENSOARG00000022982	0.996489242	1.85E-05
MSTRG.1344	ENSOARG00000022982	0.961531868	0.002191233
MSTRG.13446	ENSOARG00000022982	-0.960272269	0.002336088
MSTRG.13472	ENSOARG00000022982	-0.932134356	0.006752333
MSTRG.13619	ENSOARG00000022982	0.94775835	0.004022496
MSTRG.13706	ENSOARG00000022982	-0.941225168	0.005080203
MSTRG.13774	ENSOARG00000022982	-0.918826581	0.009616255
MSTRG.13814	ENSOARG00000022982	0.930152729	0.007147582
MSTRG.13849	ENSOARG00000022982	-0.960824857	0.002271977
MSTRG.13887	ENSOARG00000022982	0.951608748	0.003455911
MSTRG.13892	ENSOARG00000022982	0.959840762	0.002386763
MSTRG.14211	ENSOARG00000022982	0.940190652	0.005258763
MSTRG.1424	ENSOARG00000022982	0.975622241	0.000884169
MSTRG.14291	ENSOARG00000022982	0.944517743	0.004532026
MSTRG.1430	ENSOARG00000022982	0.931428003	0.006891961
MSTRG.14320	ENSOARG00000022982	0.951724875	0.003439479
MSTRG.14476	ENSOARG00000022982	0.940730047	0.005165285
MSTRG.14512	ENSOARG00000022982	0.968079253	0.001512139
MSTRG.14626	ENSOARG00000022982	-0.964465127	0.001871655
MSTRG.14695	ENSOARG00000022982	0.941250794	0.005075818
MSTRG.14718	ENSOARG00000022982	0.987173193	0.000245735
MSTRG.14755	ENSOARG00000022982	0.926753465	0.007851097
MSTRG.14760	ENSOARG00000022982	-0.927025537	0.007793604
MSTRG.14766	ENSOARG00000022982	0.930022672	0.007173906
MSTRG.1492	ENSOARG00000022982	0.968439016	0.001478425
MSTRG.14920	ENSOARG00000022982	-0.95602859	0.002857718
MSTRG.14938	ENSOARG00000022982	-0.986025089	0.000291583
MSTRG.1502	ENSOARG00000022982	0.919559048	0.009445864
MSTRG.15050	ENSOARG00000022982	-0.941169191	0.005089788
MSTRG.15095	ENSOARG00000022982	-0.921125399	0.009086457
MSTRG.15228	ENSOARG00000022982	-0.931010562	0.006975135
MSTRG.15455	ENSOARG00000022982	0.960406306	0.002320456
MSTRG.15460	ENSOARG00000022982	-0.927999168	0.007589549
MSTRG.15657	ENSOARG00000022982	-0.924641188	0.008304446
MSTRG.15715	ENSOARG00000022982	-0.923250141	0.008609762
MSTRG.15717	ENSOARG00000022982	0.941894314	0.004966316
MSTRG.15735	ENSOARG00000022982	0.95701769	0.002731514
MSTRG.15967	ENSOARG00000022982	-0.950380889	0.003632002
MSTRG.16000	ENSOARG00000022982	-0.944383304	0.004553808
MSTRG.16019	ENSOARG00000022982	-0.917756284	0.009867894
MSTRG.16037	ENSOARG00000022982	-0.95184999	0.003421819
MSTRG.163	ENSOARG00000022982	-0.922350133	0.008810158
MSTRG.16394	ENSOARG00000022982	0.918218993	0.009758719
MSTRG.16435	ENSOARG00000022982	0.94717814	0.004111533
MSTRG.16453	ENSOARG00000022982	0.931362468	0.006904987
MSTRG.16463	ENSOARG00000022982	-0.920531906	0.009221839
MSTRG.16556	ENSOARG00000022982	0.975741104	0.000875603
MSTRG.16748	ENSOARG00000022982	0.949798056	0.003717092
MSTRG.16856	ENSOARG00000022982	0.928167785	0.007554478
MSTRG.16873	ENSOARG00000022982	0.958554183	0.002541037
MSTRG.16960	ENSOARG00000022982	0.984690142	0.000349793
MSTRG.17134	ENSOARG00000022982	0.924540805	0.008326299
MSTRG.17297	ENSOARG00000022982	-0.928470003	0.007491818
MSTRG.17480	ENSOARG00000022982	-0.920964096	0.009123155
MSTRG.17558	ENSOARG00000022982	0.95611523	0.002846551
MSTRG.1767	ENSOARG00000022982	0.964439484	0.001874341
MSTRG.17747	ENSOARG00000022982	0.927554149	0.00768249
MSTRG.1779	ENSOARG00000022982	0.941701085	0.004999073
MSTRG.18132	ENSOARG00000022982	-0.927306362	0.007734478
MSTRG.18225	ENSOARG00000022982	0.957134863	0.002716749
MSTRG.18303	ENSOARG00000022982	0.939097853	0.005450662
MSTRG.18311	ENSOARG00000022982	-0.931081349	0.006960996
MSTRG.18332	ENSOARG00000022982	0.942659202	0.004837683
MSTRG.18336	ENSOARG00000022982	0.932339134	0.006712114
MSTRG.18399	ENSOARG00000022982	0.933122493	0.006559343
MSTRG.18406	ENSOARG00000022982	0.94545205	0.004382065
MSTRG.18508	ENSOARG00000022982	0.956011155	0.002859968
MSTRG.18517	ENSOARG00000022982	0.931077111	0.006961843
MSTRG.18525	ENSOARG00000022982	0.926629357	0.007877391
MSTRG.18568	ENSOARG00000022982	-0.931346016	0.006908258
MSTRG.18657	ENSOARG00000022982	0.932181699	0.006743024
MSTRG.18766	ENSOARG00000022982	0.978395744	0.000695074
MSTRG.18796	ENSOARG00000022982	-0.963974334	0.001923395
MSTRG.18884	ENSOARG00000022982	0.918216364	0.009759337
MSTRG.1893	ENSOARG00000022982	-0.956693939	0.002772514
MSTRG.18944	ENSOARG00000022982	-0.931404679	0.006896596
MSTRG.18963	ENSOARG00000022982	-0.941777636	0.004986083
MSTRG.19094	ENSOARG00000022982	-0.918843413	0.009612323
MSTRG.19192	ENSOARG00000022982	-0.956778024	0.002761836
MSTRG.1927	ENSOARG00000022982	0.929153907	0.007350959
MSTRG.1937	ENSOARG00000022982	0.964540392	0.001863783
MSTRG.19547	ENSOARG00000022982	0.927608974	0.00767101
MSTRG.1967	ENSOARG00000022982	0.942781647	0.004817245
MSTRG.1972	ENSOARG00000022982	0.947423573	0.004073753
MSTRG.19807	ENSOARG00000022982	0.918804868	0.009621329
MSTRG.19812	ENSOARG00000022982	0.928796189	0.007424473
MSTRG.19835	ENSOARG00000022982	0.938713177	0.005519013
MSTRG.19845	ENSOARG00000022982	-0.952442577	0.003338782
MSTRG.19857	ENSOARG00000022982	0.989211948	0.000173945
MSTRG.1987	ENSOARG00000022982	0.965629931	0.001751652
MSTRG.19911	ENSOARG00000022982	-0.923453052	0.008564892
MSTRG.2001	ENSOARG00000022982	0.978879478	0.000664404
MSTRG.2023	ENSOARG00000022982	-0.939414579	0.005394698
MSTRG.20365	ENSOARG00000022982	0.950494783	0.003615487
MSTRG.20385	ENSOARG00000022982	0.924166291	0.008408077
MSTRG.20523	ENSOARG00000022982	0.955276346	0.00295558
MSTRG.20534	ENSOARG00000022982	0.940262447	0.005246274
MSTRG.20572	ENSOARG00000022982	-0.960270125	0.002336338
MSTRG.20583	ENSOARG00000022982	0.927625839	0.00766748
MSTRG.20604	ENSOARG00000022982	0.918723511	0.009640351
MSTRG.20626	ENSOARG00000022982	0.972161368	0.001151697
MSTRG.20771	ENSOARG00000022982	0.956402403	0.002809692
MSTRG.2087	ENSOARG00000022982	0.947818901	0.004013259
MSTRG.20937	ENSOARG00000022982	0.921896062	0.008912112
MSTRG.21064	ENSOARG00000022982	0.929529122	0.007274233
MSTRG.21234	ENSOARG00000022982	0.956104943	0.002847876
MSTRG.21259	ENSOARG00000022982	0.979924341	0.000600503
MSTRG.21401	ENSOARG00000022982	0.92602965	0.00800505
MSTRG.21457	ENSOARG00000022982	0.946597816	0.004201544
MSTRG.2173	ENSOARG00000022982	0.976838975	0.000798437
MSTRG.21733	ENSOARG00000022982	0.94280149	0.004813937
MSTRG.21762	ENSOARG00000022982	0.961153485	0.002234267
MSTRG.21802	ENSOARG00000022982	-0.920916688	0.009133955
MSTRG.21807	ENSOARG00000022982	0.995209635	3.44E-05
MSTRG.21907	ENSOARG00000022982	0.921062605	0.009100735
MSTRG.21914	ENSOARG00000022982	0.919986482	0.009347115
MSTRG.22003	ENSOARG00000022982	0.94933608	0.003785226
MSTRG.22112	ENSOARG00000022982	0.949439074	0.003769984
MSTRG.22135	ENSOARG00000022982	0.968594217	0.001463997
MSTRG.22157	ENSOARG00000022982	-0.952844849	0.003282985
MSTRG.22166	ENSOARG00000022982	0.927908308	0.00760848
MSTRG.22219	ENSOARG00000022982	0.934843904	0.006229671
MSTRG.22550	ENSOARG00000022982	0.923893196	0.008467954
MSTRG.22560	ENSOARG00000022982	0.951658214	0.003448907
MSTRG.22699	ENSOARG00000022982	0.924212982	0.00839786
MSTRG.22734	ENSOARG00000022982	-0.91881776	0.009618316
MSTRG.22849	ENSOARG00000022982	-0.934143934	0.006362723
MSTRG.2285	ENSOARG00000022982	-0.978099117	0.000714221
MSTRG.22890	ENSOARG00000022982	0.93077686	0.007021911
MSTRG.22928	ENSOARG00000022982	0.931491693	0.006879314
MSTRG.22965	ENSOARG00000022982	0.97007674	0.001329706
MSTRG.23001	ENSOARG00000022982	-0.925581131	0.00810118
MSTRG.23036	ENSOARG00000022982	0.927943312	0.007601184
MSTRG.23139	ENSOARG00000022982	0.930074652	0.00716338
MSTRG.2319	ENSOARG00000022982	-0.943645258	0.004674298
MSTRG.23265	ENSOARG00000022982	-0.934847732	0.006228947
MSTRG.23274	ENSOARG00000022982	0.944045496	0.004608766
MSTRG.23306	ENSOARG00000022982	0.932166969	0.006745919
MSTRG.23320	ENSOARG00000022982	-0.920400201	0.009252015
MSTRG.23400	ENSOARG00000022982	-0.932580042	0.006664949
MSTRG.23541	ENSOARG00000022982	0.949633924	0.00374123
MSTRG.23578	ENSOARG00000022982	0.949761388	0.003722478
MSTRG.23650	ENSOARG00000022982	-0.989334953	0.000170008
MSTRG.23653	ENSOARG00000022982	0.917920556	0.009829067
MSTRG.23813	ENSOARG00000022982	-0.961801771	0.002160789
MSTRG.23825	ENSOARG00000022982	-0.942705545	0.004829943
MSTRG.23854	ENSOARG00000022982	0.917570888	0.009911803
MSTRG.23887	ENSOARG00000022982	-0.940611665	0.005185731
MSTRG.24145	ENSOARG00000022982	0.920251794	0.009286074
MSTRG.24280	ENSOARG00000022982	0.925396641	0.008140883
MSTRG.24412	ENSOARG00000022982	0.932521003	0.006676493
MSTRG.2454	ENSOARG00000022982	0.938122337	0.005624808
MSTRG.2476	ENSOARG00000022982	0.984384621	0.000363856
MSTRG.24881	ENSOARG00000022982	-0.939791106	0.005328534
MSTRG.24893	ENSOARG00000022982	0.949881423	0.003704862
MSTRG.25173	ENSOARG00000022982	0.964728182	0.001844211
MSTRG.2575	ENSOARG00000022982	0.946188454	0.004265613
MSTRG.2629	ENSOARG00000022982	0.988152763	0.000209704
MSTRG.2651	ENSOARG00000022982	0.961529615	0.002191488
MSTRG.2735	ENSOARG00000022982	0.98233339	0.000465407
MSTRG.2783	ENSOARG00000022982	-0.925257499	0.00817089
MSTRG.2789	ENSOARG00000022982	-0.974310842	0.000981423
MSTRG.2825	ENSOARG00000022982	-0.965769954	0.00173749
MSTRG.2850	ENSOARG00000022982	0.978994125	0.000657236
MSTRG.2906	ENSOARG00000022982	0.945077442	0.004441894
MSTRG.2944	ENSOARG00000022982	-0.949225196	0.00380167
MSTRG.2959	ENSOARG00000022982	0.92262844	0.00874795
MSTRG.3019	ENSOARG00000022982	-0.932347662	0.006710441
MSTRG.3134	ENSOARG00000022982	0.933580605	0.006470798
MSTRG.326	ENSOARG00000022982	-0.919961419	0.009352891
MSTRG.3328	ENSOARG00000022982	-0.938873139	0.00549054
MSTRG.3336	ENSOARG00000022982	0.920033772	0.00933622
MSTRG.3362	ENSOARG00000022982	-0.959649494	0.002409396
MSTRG.3388	ENSOARG00000022982	-0.940377799	0.005226238
MSTRG.3422	ENSOARG00000022982	-0.936490715	0.005922064
MSTRG.3836	ENSOARG00000022982	-0.936224654	0.005971245
MSTRG.3881	ENSOARG00000022982	-0.991061963	0.000119476
MSTRG.3911	ENSOARG00000022982	-0.934414392	0.006311151
MSTRG.3980	ENSOARG00000022982	-0.93170268	0.006837499
MSTRG.4045	ENSOARG00000022982	-0.922658065	0.008741341
MSTRG.407	ENSOARG00000022982	0.920784548	0.00916409
MSTRG.4216	ENSOARG00000022982	-0.929442977	0.007291813
MSTRG.4276	ENSOARG00000022982	0.920700398	0.009183305
MSTRG.4312	ENSOARG00000022982	-0.917391147	0.009954463
MSTRG.4341	ENSOARG00000022982	0.965026043	0.001813377
MSTRG.4357	ENSOARG00000022982	0.945855701	0.004318043
MSTRG.4533	ENSOARG00000022982	0.965834442	0.001730988
MSTRG.4591	ENSOARG00000022982	-0.968033298	0.001516472
MSTRG.4606	ENSOARG00000022982	0.961266801	0.002221336
MSTRG.4609	ENSOARG00000022982	0.953688269	0.003167501
MSTRG.4825	ENSOARG00000022982	-0.932233454	0.006732855
MSTRG.4832	ENSOARG00000022982	0.918350948	0.009727692
MSTRG.4869	ENSOARG00000022982	0.985751769	0.000303072
MSTRG.4916	ENSOARG00000022982	0.953774409	0.00315582
MSTRG.507	ENSOARG00000022982	-0.933745753	0.006439022
MSTRG.5084	ENSOARG00000022982	-0.927112567	0.007775257
MSTRG.5136	ENSOARG00000022982	-0.927199721	0.007756905
MSTRG.5199	ENSOARG00000022982	-0.946732827	0.004180518
MSTRG.535	ENSOARG00000022982	-0.930378809	0.007101935
MSTRG.5502	ENSOARG00000022982	-0.966548363	0.001659802
MSTRG.5560	ENSOARG00000022982	-0.925745868	0.008065808
MSTRG.5572	ENSOARG00000022982	-0.983000712	0.000431008
MSTRG.5631	ENSOARG00000022982	-0.947029138	0.004134553
MSTRG.5667	ENSOARG00000022982	0.957908054	0.00262031
MSTRG.5706	ENSOARG00000022982	-0.937390055	0.005757292
MSTRG.5786	ENSOARG00000022982	0.991603657	0.000105452
MSTRG.5838	ENSOARG00000022982	0.941571225	0.005021147
MSTRG.5926	ENSOARG00000022982	-0.937692965	0.005702307
MSTRG.6044	ENSOARG00000022982	-0.937993038	0.005648091
MSTRG.6176	ENSOARG00000022982	-0.929748179	0.00722962
MSTRG.6201	ENSOARG00000022982	0.920608921	0.009204216
MSTRG.635	ENSOARG00000022982	0.936395549	0.005939633
MSTRG.6694	ENSOARG00000022982	-0.922079288	0.008870903
MSTRG.6807	ENSOARG00000022982	0.958243773	0.002578971
MSTRG.7097	ENSOARG00000022982	-0.954743751	0.003025847
MSTRG.711	ENSOARG00000022982	-0.940327066	0.005235045
MSTRG.7125	ENSOARG00000022982	0.98273774	0.000444406
MSTRG.7205	ENSOARG00000022982	0.945542379	0.004367698
MSTRG.7333	ENSOARG00000022982	-0.933776446	0.006433125
MSTRG.7346	ENSOARG00000022982	-0.939234141	0.005426546
MSTRG.7388	ENSOARG00000022982	-0.930273125	0.007123255
MSTRG.7442	ENSOARG00000022982	-0.952429607	0.003340589
MSTRG.7488	ENSOARG00000022982	-0.939980181	0.005295461
MSTRG.7667	ENSOARG00000022982	-0.974124487	0.000995651
MSTRG.7687	ENSOARG00000022982	-0.936882301	0.00585004
MSTRG.7703	ENSOARG00000022982	0.923508425	0.008552667
MSTRG.7706	ENSOARG00000022982	-0.964220271	0.001897381
MSTRG.7916	ENSOARG00000022982	-0.971445922	0.001211363
MSTRG.7926	ENSOARG00000022982	0.954774217	0.003021805
MSTRG.8074	ENSOARG00000022982	-0.954885497	0.003007066
MSTRG.8332	ENSOARG00000022982	-0.9286876	0.007446859
MSTRG.8430	ENSOARG00000022982	-0.92270517	0.008730838
MSTRG.8453	ENSOARG00000022982	-0.95481586	0.003016286
MSTRG.8465	ENSOARG00000022982	0.976617581	0.000813714
MSTRG.8516	ENSOARG00000022982	-0.92873368	0.007437356
MSTRG.8570	ENSOARG00000022982	-0.942871247	0.004802316
MSTRG.8620	ENSOARG00000022982	-0.936025499	0.00600819
MSTRG.8969	ENSOARG00000022982	-0.925358284	0.00814915
MSTRG.8988	ENSOARG00000022982	0.979208082	0.000643962
MSTRG.8993	ENSOARG00000022982	0.922611579	0.008751713
MSTRG.9066	ENSOARG00000022982	-0.924085592	0.008425749
MSTRG.9106	ENSOARG00000022982	-0.924162027	0.00840901
MSTRG.9107	ENSOARG00000022982	-0.937945566	0.005656651
MSTRG.9247	ENSOARG00000022982	0.939324013	0.005410672
MSTRG.9256	ENSOARG00000022982	0.961886826	0.002151239
MSTRG.9312	ENSOARG00000022982	0.942578362	0.0048512
MSTRG.9539	ENSOARG00000022982	0.946105203	0.004278701
MSTRG.9747	ENSOARG00000022982	-0.941059456	0.005108602
MSTRG.9796	ENSOARG00000022982	0.934579906	0.006279691
MSTRG.9856	ENSOARG00000022982	0.945599157	0.004358679
MSTRG.9880	ENSOARG00000022982	-0.945556838	0.0043654
MSTRG.991	ENSOARG00000022982	-0.92364087	0.008523461
MSTRG.9926	ENSOARG00000022982	0.938742441	0.005513799
MSTRG.9971	ENSOARG00000022982	-0.918862224	0.009607929
MSTRG.10044	ENSOARG00000000245	0.966102573	0.001704079
MSTRG.10125	ENSOARG00000000245	0.95033495	0.003638673
MSTRG.10126	ENSOARG00000000245	0.92069353	0.009184875
MSTRG.10131	ENSOARG00000000245	0.956749836	0.002765414
MSTRG.10156	ENSOARG00000000245	0.940150574	0.005265742
MSTRG.10257	ENSOARG00000000245	0.961588407	0.002184838
MSTRG.10275	ENSOARG00000000245	0.962944663	0.002034207
MSTRG.10289	ENSOARG00000000245	0.945565343	0.004364049
MSTRG.10303	ENSOARG00000000245	0.91863368	0.009661375
MSTRG.10319	ENSOARG00000000245	-0.920634258	0.009198422
MSTRG.10320	ENSOARG00000000245	-0.940608811	0.005186224
MSTRG.10341	ENSOARG00000000245	0.938751236	0.005512232
MSTRG.10343	ENSOARG00000000245	0.943288132	0.004733155
MSTRG.10378	ENSOARG00000000245	-0.923521163	0.008549856
MSTRG.10399	ENSOARG00000000245	0.97743087	0.0007583
MSTRG.1049	ENSOARG00000000245	-0.9534287	0.003202825
MSTRG.10541	ENSOARG00000000245	0.983760356	0.000393448
MSTRG.10545	ENSOARG00000000245	0.982118182	0.00047678
MSTRG.10567	ENSOARG00000000245	-0.935490299	0.006108024
MSTRG.10590	ENSOARG00000000245	0.946530449	0.004212055
MSTRG.10628	ENSOARG00000000245	0.994073346	5.26E-05
MSTRG.10658	ENSOARG00000000245	0.963493432	0.001974768
MSTRG.10690	ENSOARG00000000245	-0.95117766	0.003517244
MSTRG.10740	ENSOARG00000000245	-0.928245279	0.007538387
MSTRG.10792	ENSOARG00000000245	-0.946521977	0.004213378
MSTRG.10848	ENSOARG00000000245	0.944386841	0.004553234
MSTRG.10892	ENSOARG00000000245	-0.93368738	0.006450245
MSTRG.10952	ENSOARG00000000245	-0.961047941	0.002246344
MSTRG.10953	ENSOARG00000000245	0.96794287	0.001525017
MSTRG.10990	ENSOARG00000000245	-0.941615147	0.005013676
MSTRG.10998	ENSOARG00000000245	-0.959008712	0.00248599
MSTRG.11006	ENSOARG00000000245	-0.939367415	0.005403013
MSTRG.1102	ENSOARG00000000245	-0.94443506	0.004545417
MSTRG.11022	ENSOARG00000000245	0.948336555	0.00393472
MSTRG.11037	ENSOARG00000000245	0.980371162	0.000574156
MSTRG.11048	ENSOARG00000000245	-0.935565228	0.006093998
MSTRG.11099	ENSOARG00000000245	-0.962465897	0.002086774
MSTRG.11103	ENSOARG00000000245	-0.925081131	0.008209002
MSTRG.1117	ENSOARG00000000245	0.956489904	0.002798508
MSTRG.11268	ENSOARG00000000245	-0.957745259	0.002640473
MSTRG.11284	ENSOARG00000000245	-0.944429971	0.004546241
MSTRG.11288	ENSOARG00000000245	-0.930110057	0.007156214
MSTRG.11314	ENSOARG00000000245	0.93430471	0.00633204
MSTRG.1134	ENSOARG00000000245	0.947461939	0.004067863
MSTRG.11346	ENSOARG00000000245	0.947738186	0.004025575
MSTRG.11368	ENSOARG00000000245	0.964039591	0.001916475
MSTRG.11402	ENSOARG00000000245	0.968502745	0.001472492
MSTRG.11424	ENSOARG00000000245	-0.937507067	0.005736021
MSTRG.11478	ENSOARG00000000245	-0.942933108	0.004792022
MSTRG.11504	ENSOARG00000000245	-0.920949225	0.009126542
MSTRG.11574	ENSOARG00000000245	0.941834499	0.004976445
MSTRG.11665	ENSOARG00000000245	-0.928277855	0.007531627
MSTRG.1167	ENSOARG00000000245	0.945928616	0.004306527
MSTRG.11689	ENSOARG00000000245	-0.954046654	0.003119045
MSTRG.11743	ENSOARG00000000245	0.957494504	0.002671678
MSTRG.11767	ENSOARG00000000245	0.975232656	0.000912536
MSTRG.11815	ENSOARG00000000245	-0.946492656	0.004217957
MSTRG.11865	ENSOARG00000000245	-0.982426125	0.000460548
MSTRG.11866	ENSOARG00000000245	-0.956577156	0.002787377
MSTRG.12075	ENSOARG00000000245	0.917459769	0.009938166
MSTRG.1208	ENSOARG00000000245	0.975372097	0.000902332
MSTRG.12135	ENSOARG00000000245	-0.938215021	0.005608147
MSTRG.12136	ENSOARG00000000245	-0.933402988	0.006505059
MSTRG.12194	ENSOARG00000000245	-0.922656098	0.00874178
MSTRG.12213	ENSOARG00000000245	0.968129278	0.001507428
MSTRG.12216	ENSOARG00000000245	0.929167901	0.007348091
MSTRG.12227	ENSOARG00000000245	0.936732181	0.005877601
MSTRG.12245	ENSOARG00000000245	-0.961846986	0.00215571
MSTRG.12255	ENSOARG00000000245	-0.964021321	0.001918411
MSTRG.12263	ENSOARG00000000245	-0.926540868	0.007896164
MSTRG.12300	ENSOARG00000000245	0.955693794	0.002901072
MSTRG.12308	ENSOARG00000000245	0.929503838	0.007279391
MSTRG.12312	ENSOARG00000000245	0.939872879	0.005314218
MSTRG.12319	ENSOARG00000000245	0.933720773	0.006443824
MSTRG.1234	ENSOARG00000000245	0.96852859	0.001470089
MSTRG.124	ENSOARG00000000245	0.978082116	0.000715326
MSTRG.12413	ENSOARG00000000245	-0.95739747	0.002683802
MSTRG.12426	ENSOARG00000000245	-0.93315992	0.006552087
MSTRG.12448	ENSOARG00000000245	0.952853232	0.003281827
MSTRG.12492	ENSOARG00000000245	0.955076304	0.002981877
MSTRG.12569	ENSOARG00000000245	0.937786014	0.005685468
MSTRG.12798	ENSOARG00000000245	0.931481968	0.006881245
MSTRG.12836	ENSOARG00000000245	0.939675309	0.00534884
MSTRG.12845	ENSOARG00000000245	0.990255665	0.000141965
MSTRG.12895	ENSOARG00000000245	-0.969642002	0.001368423
MSTRG.12937	ENSOARG00000000245	0.930158446	0.007146426
MSTRG.12948	ENSOARG00000000245	0.944285446	0.004569695
MSTRG.12978	ENSOARG00000000245	0.998832608	2.04E-06
MSTRG.12984	ENSOARG00000000245	-0.982459966	0.000458781
MSTRG.1300	ENSOARG00000000245	-0.920689907	0.009185703
MSTRG.13031	ENSOARG00000000245	0.975759253	0.000874299
MSTRG.13054	ENSOARG00000000245	0.955933495	0.00287
MSTRG.13059	ENSOARG00000000245	-0.940124506	0.005270283
MSTRG.13081	ENSOARG00000000245	0.981166747	0.000528697
MSTRG.13086	ENSOARG00000000245	0.950154181	0.003664985
MSTRG.13129	ENSOARG00000000245	0.93676654	0.005871287
MSTRG.1313	ENSOARG00000000245	0.928374662	0.007511558
MSTRG.13132	ENSOARG00000000245	0.963493192	0.001974793
MSTRG.13135	ENSOARG00000000245	0.939559328	0.005369215
MSTRG.13184	ENSOARG00000000245	-0.962131583	0.002123874
MSTRG.13203	ENSOARG00000000245	0.950850201	0.003564188
MSTRG.13221	ENSOARG00000000245	0.987729186	0.000224935
MSTRG.13252	ENSOARG00000000245	0.917661811	0.009890257
MSTRG.13354	ENSOARG00000000245	0.936182614	0.005979035
MSTRG.13472	ENSOARG00000000245	0.933033228	0.006576665
MSTRG.13639	ENSOARG00000000245	-0.952648013	0.003310229
MSTRG.13762	ENSOARG00000000245	-0.945789968	0.004328437
MSTRG.13774	ENSOARG00000000245	0.954667824	0.00303593
MSTRG.13814	ENSOARG00000000245	-0.925703267	0.008074948
MSTRG.13830	ENSOARG00000000245	-0.941416317	0.005047541
MSTRG.13833	ENSOARG00000000245	-0.961373605	0.002209182
MSTRG.13849	ENSOARG00000000245	0.964083217	0.001911856
MSTRG.13881	ENSOARG00000000245	0.941471975	0.00503805
MSTRG.13890	ENSOARG00000000245	0.950511199	0.00361311
MSTRG.13892	ENSOARG00000000245	-0.963249654	0.002001065
MSTRG.13904	ENSOARG00000000245	0.96989272	0.001346027
MSTRG.13913	ENSOARG00000000245	-0.947096395	0.004124154
MSTRG.14033	ENSOARG00000000245	0.976539939	0.000819106
MSTRG.14093	ENSOARG00000000245	0.958521064	0.002545071
MSTRG.14130	ENSOARG00000000245	0.94082339	0.005149192
MSTRG.14149	ENSOARG00000000245	0.987935811	0.000217439
MSTRG.14164	ENSOARG00000000245	0.946897758	0.004154902
MSTRG.14180	ENSOARG00000000245	0.971994991	0.001165439
MSTRG.14187	ENSOARG00000000245	0.946230668	0.004258984
MSTRG.14235	ENSOARG00000000245	-0.920886298	0.009140881
MSTRG.14239	ENSOARG00000000245	-0.942744069	0.004823513
MSTRG.14285	ENSOARG00000000245	0.954945646	0.002999114
MSTRG.14286	ENSOARG00000000245	-0.92048227	0.009233206
MSTRG.14290	ENSOARG00000000245	-0.932855661	0.006611188
MSTRG.14294	ENSOARG00000000245	0.929081914	0.007365726
MSTRG.14297	ENSOARG00000000245	0.918349083	0.00972813
MSTRG.14298	ENSOARG00000000245	0.959970662	0.002371451
MSTRG.1430	ENSOARG00000000245	-0.943052948	0.004772111
MSTRG.14307	ENSOARG00000000245	0.991897398	9.82E-05
MSTRG.14341	ENSOARG00000000245	0.942134078	0.004925816
MSTRG.14393	ENSOARG00000000245	0.951992151	0.003401807
MSTRG.144	ENSOARG00000000245	-0.954138854	0.003106639
MSTRG.14445	ENSOARG00000000245	0.964411115	0.001877315
MSTRG.14457	ENSOARG00000000245	0.962978555	0.002030511
MSTRG.14460	ENSOARG00000000245	-0.958589719	0.002536712
MSTRG.14468	ENSOARG00000000245	0.9375865	0.005721603
MSTRG.14481	ENSOARG00000000245	0.932708616	0.006639843
MSTRG.14487	ENSOARG00000000245	0.969804714	0.001353868
MSTRG.14510	ENSOARG00000000245	0.956614801	0.002782582
MSTRG.14545	ENSOARG00000000245	0.982931289	0.000434525
MSTRG.14591	ENSOARG00000000245	0.992921477	7.50E-05
MSTRG.14622	ENSOARG00000000245	-0.930144352	0.007149276
MSTRG.14626	ENSOARG00000000245	0.958414683	0.00255805
MSTRG.14698	ENSOARG00000000245	-0.975870968	0.000866291
MSTRG.14718	ENSOARG00000000245	-0.919588641	0.009439011
MSTRG.14726	ENSOARG00000000245	0.932606793	0.006659722
MSTRG.14738	ENSOARG00000000245	0.969840796	0.00135065
MSTRG.14755	ENSOARG00000000245	-0.941331484	0.005062024
MSTRG.14760	ENSOARG00000000245	0.919476712	0.009464943
MSTRG.14766	ENSOARG00000000245	-0.942700549	0.004830777
MSTRG.14802	ENSOARG00000000245	0.956706138	0.002770964
MSTRG.14899	ENSOARG00000000245	-0.95517849	0.002968429
MSTRG.1502	ENSOARG00000000245	-0.944771773	0.004491008
MSTRG.15030	ENSOARG00000000245	0.936834453	0.005858818
MSTRG.15071	ENSOARG00000000245	0.977681949	0.000741585
MSTRG.15087	ENSOARG00000000245	0.969891094	0.001346172
MSTRG.15095	ENSOARG00000000245	0.953656638	0.003171795
MSTRG.1511	ENSOARG00000000245	0.950100214	0.003672858
MSTRG.15157	ENSOARG00000000245	0.960725412	0.00228345
MSTRG.15170	ENSOARG00000000245	0.944032727	0.004610849
MSTRG.15179	ENSOARG00000000245	-0.946829184	0.004165543
MSTRG.15213	ENSOARG00000000245	-0.936916702	0.005843734
MSTRG.15268	ENSOARG00000000245	0.918536983	0.009684031
MSTRG.15286	ENSOARG00000000245	-0.975733139	0.000876176
MSTRG.15301	ENSOARG00000000245	0.976580305	0.000816301
MSTRG.15308	ENSOARG00000000245	0.961535756	0.002190793
MSTRG.15369	ENSOARG00000000245	-0.94253594	0.004858301
MSTRG.15371	ENSOARG00000000245	-0.970271927	0.001312501
MSTRG.15373	ENSOARG00000000245	-0.926230366	0.007962213
MSTRG.15387	ENSOARG00000000245	0.94369289	0.004666475
MSTRG.15403	ENSOARG00000000245	-0.938088787	0.005630845
MSTRG.15418	ENSOARG00000000245	-0.933667861	0.006454
MSTRG.15425	ENSOARG00000000245	0.946106655	0.004278473
MSTRG.15466	ENSOARG00000000245	-0.986535634	0.000270713
MSTRG.15472	ENSOARG00000000245	-0.919514066	0.009456285
MSTRG.15516	ENSOARG00000000245	0.932785566	0.00662484
MSTRG.15519	ENSOARG00000000245	0.94861555	0.003892706
MSTRG.1554	ENSOARG00000000245	0.937898811	0.005665088
MSTRG.15578	ENSOARG00000000245	0.937336527	0.005767036
MSTRG.15598	ENSOARG00000000245	0.938518059	0.005553842
MSTRG.15599	ENSOARG00000000245	0.945240466	0.004415809
MSTRG.15608	ENSOARG00000000245	0.936782205	0.00586841
MSTRG.15657	ENSOARG00000000245	0.925957978	0.008020374
MSTRG.15691	ENSOARG00000000245	0.938029458	0.005641528
MSTRG.15713	ENSOARG00000000245	-0.974731123	0.000949707
MSTRG.15715	ENSOARG00000000245	0.949789717	0.003718317
MSTRG.15720	ENSOARG00000000245	0.935130325	0.006175624
MSTRG.15735	ENSOARG00000000245	-0.965740381	0.001740477
MSTRG.15782	ENSOARG00000000245	-0.958145539	0.002591034
MSTRG.15804	ENSOARG00000000245	0.976316989	0.000834686
MSTRG.15807	ENSOARG00000000245	0.93556424	0.006094183
MSTRG.15847	ENSOARG00000000245	-0.943856074	0.004639724
MSTRG.15874	ENSOARG00000000245	-0.919892358	0.009368817
MSTRG.15875	ENSOARG00000000245	0.934718674	0.006253374
MSTRG.15960	ENSOARG00000000245	0.942897578	0.004797933
MSTRG.15967	ENSOARG00000000245	0.971622225	0.001196521
MSTRG.15980	ENSOARG00000000245	0.936722706	0.005879342
MSTRG.16019	ENSOARG00000000245	0.935507299	0.00610484
MSTRG.16033	ENSOARG00000000245	0.966167136	0.00169763
MSTRG.1607	ENSOARG00000000245	0.976921022	0.000792812
MSTRG.16133	ENSOARG00000000245	0.926627119	0.007877865
MSTRG.16164	ENSOARG00000000245	0.949158293	0.003811609
MSTRG.16205	ENSOARG00000000245	0.923104148	0.008642117
MSTRG.16346	ENSOARG00000000245	-0.92010273	0.009320346
MSTRG.16391	ENSOARG00000000245	0.956375688	0.002813111
MSTRG.16397	ENSOARG00000000245	0.945994101	0.004296198
MSTRG.16409	ENSOARG00000000245	0.930590131	0.007059396
MSTRG.16423	ENSOARG00000000245	-0.993723909	5.90E-05
MSTRG.16432	ENSOARG00000000245	-0.9526602	0.003308539
MSTRG.1645	ENSOARG00000000245	0.943042083	0.004773915
MSTRG.16453	ENSOARG00000000245	-0.92461247	0.008310695
MSTRG.16463	ENSOARG00000000245	0.926195445	0.007969658
MSTRG.1647	ENSOARG00000000245	0.973339421	0.001056705
MSTRG.16488	ENSOARG00000000245	0.971205586	0.00123174
MSTRG.16509	ENSOARG00000000245	0.920392575	0.009253763
MSTRG.16512	ENSOARG00000000245	0.946387937	0.004234333
MSTRG.16531	ENSOARG00000000245	-0.951741066	0.003437191
MSTRG.16537	ENSOARG00000000245	0.952682862	0.003305398
MSTRG.16551	ENSOARG00000000245	0.946273025	0.004252338
MSTRG.16552	ENSOARG00000000245	0.943075281	0.004768405
MSTRG.16594	ENSOARG00000000245	-0.955568618	0.002917365
MSTRG.16605	ENSOARG00000000245	-0.937231822	0.005786118
MSTRG.16638	ENSOARG00000000245	-0.94398827	0.004618108
MSTRG.16687	ENSOARG00000000245	0.923744087	0.008500734
MSTRG.1674	ENSOARG00000000245	0.988555009	0.000195732
MSTRG.16776	ENSOARG00000000245	-0.955024594	0.002988693
MSTRG.168	ENSOARG00000000245	0.952910987	0.003273856
MSTRG.1680	ENSOARG00000000245	0.941709793	0.004997595
MSTRG.16826	ENSOARG00000000245	0.970006812	0.001335896
MSTRG.16838	ENSOARG00000000245	0.9249115	0.008245739
MSTRG.16856	ENSOARG00000000245	-0.946215483	0.004261368
MSTRG.16873	ENSOARG00000000245	-0.95940321	0.002438695
MSTRG.16906	ENSOARG00000000245	-0.92035431	0.00926254
MSTRG.16918	ENSOARG00000000245	-0.928524161	0.007480616
MSTRG.1710	ENSOARG00000000245	0.928577399	0.007469612
MSTRG.17101	ENSOARG00000000245	0.928594699	0.007466038
MSTRG.17104	ENSOARG00000000245	-0.949945859	0.003695422
MSTRG.17165	ENSOARG00000000245	-0.917774811	0.009863511
MSTRG.17195	ENSOARG00000000245	0.950537583	0.00360929
MSTRG.17261	ENSOARG00000000245	-0.921677475	0.008961395
MSTRG.1728	ENSOARG00000000245	0.961002925	0.002251505
MSTRG.17294	ENSOARG00000000245	0.977742161	0.000737604
MSTRG.17297	ENSOARG00000000245	0.948088222	0.003972302
MSTRG.17306	ENSOARG00000000245	0.928972609	0.007388173
MSTRG.17325	ENSOARG00000000245	-0.965336115	0.001781552
MSTRG.1735	ENSOARG00000000245	0.960136212	0.002352008
MSTRG.1740	ENSOARG00000000245	0.952609181	0.003315617
MSTRG.17480	ENSOARG00000000245	0.98836707	0.0002022
MSTRG.17542	ENSOARG00000000245	0.925654718	0.00808537
MSTRG.17559	ENSOARG00000000245	-0.9225787	0.008759053
MSTRG.17603	ENSOARG00000000245	0.944950467	0.004462264
MSTRG.17610	ENSOARG00000000245	0.969609229	0.001371364
MSTRG.1768	ENSOARG00000000245	0.986416514	0.000275513
MSTRG.17682	ENSOARG00000000245	-0.928575749	0.007469953
MSTRG.17729	ENSOARG00000000245	0.924808244	0.008268141
MSTRG.17738	ENSOARG00000000245	0.931641518	0.006849607
MSTRG.17746	ENSOARG00000000245	-0.939304751	0.005414072
MSTRG.17773	ENSOARG00000000245	0.923927248	0.008460477
MSTRG.17792	ENSOARG00000000245	0.920863474	0.009146085
MSTRG.17896	ENSOARG00000000245	-0.931848035	0.006808763
MSTRG.1790	ENSOARG00000000245	0.953696768	0.003166347
MSTRG.1792	ENSOARG00000000245	-0.937904722	0.005664021
MSTRG.17927	ENSOARG00000000245	0.976066447	0.000852368
MSTRG.1793	ENSOARG00000000245	-0.922648358	0.008743507
MSTRG.17981	ENSOARG00000000245	0.963697003	0.001952939
MSTRG.17983	ENSOARG00000000245	-0.984262194	0.000369569
MSTRG.18000	ENSOARG00000000245	0.925720746	0.008071197
MSTRG.18142	ENSOARG00000000245	0.920161161	0.009306904
MSTRG.18149	ENSOARG00000000245	-0.958443616	0.002554517
MSTRG.18191	ENSOARG00000000245	0.954273905	0.00308851
MSTRG.18303	ENSOARG00000000245	-0.936638449	0.005894841
MSTRG.18322	ENSOARG00000000245	0.937820569	0.005679221
MSTRG.18329	ENSOARG00000000245	0.959576148	0.002418104
MSTRG.18331	ENSOARG00000000245	0.939464141	0.005385966
MSTRG.18381	ENSOARG00000000245	0.933180454	0.006548108
MSTRG.18397	ENSOARG00000000245	0.936605514	0.005900905
MSTRG.18419	ENSOARG00000000245	-0.934264826	0.006339645
MSTRG.18443	ENSOARG00000000245	0.937150139	0.005801026
MSTRG.1850	ENSOARG00000000245	0.969666876	0.001366193
MSTRG.18517	ENSOARG00000000245	-0.945915482	0.0043086
MSTRG.18540	ENSOARG00000000245	-0.955316218	0.002950352
MSTRG.18557	ENSOARG00000000245	-0.969923845	0.00134326
MSTRG.18558	ENSOARG00000000245	-0.9207744	0.009166406
MSTRG.1858	ENSOARG00000000245	-0.92958971	0.00726188
MSTRG.18603	ENSOARG00000000245	0.981723063	0.000498017
MSTRG.18610	ENSOARG00000000245	-0.930542217	0.00706903
MSTRG.18657	ENSOARG00000000245	-0.942693557	0.004831945
MSTRG.18666	ENSOARG00000000245	-0.951855688	0.003421016
MSTRG.18687	ENSOARG00000000245	0.940075009	0.005278911
MSTRG.18691	ENSOARG00000000245	0.991868193	9.89E-05
MSTRG.18720	ENSOARG00000000245	0.93516161	0.006169734
MSTRG.18741	ENSOARG00000000245	-0.918904424	0.009598077
MSTRG.18768	ENSOARG00000000245	0.987143563	0.000246869
MSTRG.18884	ENSOARG00000000245	-0.98715298	0.000246509
MSTRG.18963	ENSOARG00000000245	0.947168307	0.00411305
MSTRG.18972	ENSOARG00000000245	0.93572608	0.006063943
MSTRG.18978	ENSOARG00000000245	0.964360561	0.00188262
MSTRG.19002	ENSOARG00000000245	0.949730549	0.003727011
MSTRG.19004	ENSOARG00000000245	0.994849059	3.97E-05
MSTRG.19011	ENSOARG00000000245	0.942600569	0.004847485
MSTRG.19089	ENSOARG00000000245	0.990974833	0.000121813
MSTRG.19094	ENSOARG00000000245	0.94648664	0.004218897
MSTRG.19097	ENSOARG00000000245	0.940322552	0.005235829
MSTRG.191	ENSOARG00000000245	-0.969517256	0.001379634
MSTRG.19177	ENSOARG00000000245	0.954544242	0.003052378
MSTRG.19184	ENSOARG00000000245	0.925340763	0.008152927
MSTRG.19232	ENSOARG00000000245	0.93610548	0.00599334
MSTRG.19243	ENSOARG00000000245	0.955815535	0.00288527
MSTRG.19265	ENSOARG00000000245	0.946409198	0.004231005
MSTRG.1927	ENSOARG00000000245	-0.973541863	0.001040789
MSTRG.1937	ENSOARG00000000245	-0.935458394	0.006114001
MSTRG.19547	ENSOARG00000000245	-0.957406723	0.002682645
MSTRG.19603	ENSOARG00000000245	-0.927826655	0.007625512
MSTRG.1977	ENSOARG00000000245	-0.93821842	0.005607536
MSTRG.19773	ENSOARG00000000245	-0.948367711	0.003930017
MSTRG.19807	ENSOARG00000000245	-0.926975954	0.007804066
MSTRG.19826	ENSOARG00000000245	0.954617142	0.00304267
MSTRG.1987	ENSOARG00000000245	-0.930968971	0.006983448
MSTRG.19873	ENSOARG00000000245	0.937360904	0.005762597
MSTRG.19875	ENSOARG00000000245	-0.961422392	0.002203642
MSTRG.19878	ENSOARG00000000245	-0.940792138	0.005154578
MSTRG.19882	ENSOARG00000000245	0.958251986	0.002577964
MSTRG.19911	ENSOARG00000000245	0.928022868	0.007584615
MSTRG.19964	ENSOARG00000000245	0.924126295	0.008416833
MSTRG.1999	ENSOARG00000000245	-0.925940492	0.008024115
MSTRG.19992	ENSOARG00000000245	0.949435928	0.003770449
MSTRG.19996	ENSOARG00000000245	0.925928625	0.008026654
MSTRG.200	ENSOARG00000000245	-0.929242614	0.007332784
MSTRG.20020	ENSOARG00000000245	0.966269264	0.001687455
MSTRG.20062	ENSOARG00000000245	0.927567414	0.007679711
MSTRG.20155	ENSOARG00000000245	0.939054048	0.005458424
MSTRG.20160	ENSOARG00000000245	0.958867639	0.002503011
MSTRG.20167	ENSOARG00000000245	-0.91853518	0.009684454
MSTRG.2023	ENSOARG00000000245	0.920640365	0.009197026
MSTRG.20251	ENSOARG00000000245	0.989811236	0.000155188
MSTRG.20299	ENSOARG00000000245	-0.930608838	0.007055636
MSTRG.20310	ENSOARG00000000245	-0.924933829	0.008240899
MSTRG.20335	ENSOARG00000000245	0.951460497	0.003476943
MSTRG.20354	ENSOARG00000000245	0.987237087	0.000243298
MSTRG.20361	ENSOARG00000000245	0.921431755	0.009016954
MSTRG.20380	ENSOARG00000000245	-0.950922547	0.003553791
MSTRG.20443	ENSOARG00000000245	-0.919039499	0.009566572
MSTRG.20450	ENSOARG00000000245	-0.973736736	0.001025581
MSTRG.20454	ENSOARG00000000245	0.940778827	0.005156872
MSTRG.20483	ENSOARG00000000245	0.928353965	0.007515847
MSTRG.20496	ENSOARG00000000245	-0.926120701	0.007985604
MSTRG.20572	ENSOARG00000000245	0.96042006	0.002318855
MSTRG.20583	ENSOARG00000000245	-0.940373649	0.005226958
MSTRG.20634	ENSOARG00000000245	-0.963901664	0.001931115
MSTRG.20636	ENSOARG00000000245	0.995809505	2.63E-05
MSTRG.20654	ENSOARG00000000245	-0.95932933	0.002447518
MSTRG.2066	ENSOARG00000000245	0.917520353	0.009923788
MSTRG.20724	ENSOARG00000000245	0.926009733	0.008009307
MSTRG.20727	ENSOARG00000000245	0.938123013	0.005624686
MSTRG.20762	ENSOARG00000000245	-0.972549815	0.001119927
MSTRG.20817	ENSOARG00000000245	0.986350351	0.000278198
MSTRG.20819	ENSOARG00000000245	-0.987799398	0.000222374
MSTRG.20833	ENSOARG00000000245	-0.92141481	0.009020792
MSTRG.20835	ENSOARG00000000245	0.942983822	0.004783591
MSTRG.20860	ENSOARG00000000245	-0.917712603	0.009878231
MSTRG.20919	ENSOARG00000000245	0.941481481	0.00503643
MSTRG.20937	ENSOARG00000000245	-0.931459468	0.006885712
MSTRG.20964	ENSOARG00000000245	-0.923372873	0.008582608
MSTRG.20997	ENSOARG00000000245	-0.917345629	0.009965281
MSTRG.21016	ENSOARG00000000245	-0.932309595	0.006717908
MSTRG.2102	ENSOARG00000000245	0.980699137	0.00055519
MSTRG.21053	ENSOARG00000000245	0.971668662	0.001192627
MSTRG.21156	ENSOARG00000000245	-0.972126047	0.001154607
MSTRG.21181	ENSOARG00000000245	-0.938128058	0.005623779
MSTRG.21213	ENSOARG00000000245	0.931469529	0.006883714
MSTRG.21239	ENSOARG00000000245	-0.921590138	0.008981124
MSTRG.21254	ENSOARG00000000245	0.966939312	0.001621446
MSTRG.21258	ENSOARG00000000245	0.945694658	0.00434353
MSTRG.21262	ENSOARG00000000245	-0.934553784	0.006284651
MSTRG.21393	ENSOARG00000000245	0.91886249	0.009607867
MSTRG.21595	ENSOARG00000000245	0.951418952	0.003482849
MSTRG.21597	ENSOARG00000000245	0.964278449	0.001891253
MSTRG.21599	ENSOARG00000000245	-0.93577233	0.006055315
MSTRG.21624	ENSOARG00000000245	0.935211654	0.006160319
MSTRG.21660	ENSOARG00000000245	0.981700416	0.000499248
MSTRG.21688	ENSOARG00000000245	0.957940922	0.002616248
MSTRG.21701	ENSOARG00000000245	-0.957800503	0.002633622
MSTRG.2173	ENSOARG00000000245	-0.9273619	0.00772281
MSTRG.21770	ENSOARG00000000245	-0.954794861	0.003019068
MSTRG.21802	ENSOARG00000000245	0.946260189	0.004254352
MSTRG.2183	ENSOARG00000000245	-0.99507395	3.63E-05
MSTRG.21832	ENSOARG00000000245	-0.925282734	0.008165444
MSTRG.21839	ENSOARG00000000245	0.922656933	0.008741594
MSTRG.21854	ENSOARG00000000245	0.94579477	0.004327677
MSTRG.21914	ENSOARG00000000245	-0.977389304	0.000761086
MSTRG.22000	ENSOARG00000000245	0.976276144	0.000837556
MSTRG.22017	ENSOARG00000000245	0.973130133	0.001073285
MSTRG.22051	ENSOARG00000000245	0.974219289	0.0009884
MSTRG.22111	ENSOARG00000000245	0.951243128	0.003507896
MSTRG.22112	ENSOARG00000000245	-0.95779373	0.002634461
MSTRG.22140	ENSOARG00000000245	-0.928183353	0.007551244
MSTRG.22155	ENSOARG00000000245	0.972588263	0.001116806
MSTRG.22156	ENSOARG00000000245	-0.951839358	0.003423318
MSTRG.2216	ENSOARG00000000245	0.928585425	0.007467954
MSTRG.22164	ENSOARG00000000245	0.979565425	0.000622091
MSTRG.22166	ENSOARG00000000245	-0.983730305	0.000394901
MSTRG.22201	ENSOARG00000000245	0.93813871	0.005621863
MSTRG.22239	ENSOARG00000000245	0.943428461	0.004709985
MSTRG.22252	ENSOARG00000000245	-0.983696437	0.000396542
MSTRG.2227	ENSOARG00000000245	0.945168322	0.004427343
MSTRG.2230	ENSOARG00000000245	0.954580633	0.00304753
MSTRG.22305	ENSOARG00000000245	0.974969373	0.000931957
MSTRG.22317	ENSOARG00000000245	-0.930649038	0.00704756
MSTRG.22328	ENSOARG00000000245	-0.949811966	0.00371505
MSTRG.22360	ENSOARG00000000245	0.969618891	0.001370497
MSTRG.22386	ENSOARG00000000245	0.965973471	0.001717009
MSTRG.22401	ENSOARG00000000245	-0.934553765	0.006284654
MSTRG.22466	ENSOARG00000000245	0.952566438	0.003321553
MSTRG.2251	ENSOARG00000000245	0.933864323	0.006416255
MSTRG.22550	ENSOARG00000000245	-0.924324084	0.008373574
MSTRG.22560	ENSOARG00000000245	-0.939979023	0.005295663
MSTRG.22625	ENSOARG00000000245	-0.918563884	0.009677726
MSTRG.22657	ENSOARG00000000245	-0.948513349	0.00390807
MSTRG.22675	ENSOARG00000000245	-0.943984144	0.004618782
MSTRG.22734	ENSOARG00000000245	0.946745205	0.004178593
MSTRG.22754	ENSOARG00000000245	-0.944910176	0.004468737
MSTRG.22765	ENSOARG00000000245	0.975128983	0.000920159
MSTRG.22778	ENSOARG00000000245	0.917228726	0.009993089
MSTRG.22779	ENSOARG00000000245	0.919989051	0.009346523
MSTRG.22786	ENSOARG00000000245	-0.956256414	0.0028284
MSTRG.22792	ENSOARG00000000245	-0.933413772	0.006502976
MSTRG.22794	ENSOARG00000000245	-0.930224874	0.007133
MSTRG.22849	ENSOARG00000000245	0.950120643	0.003669877
MSTRG.22869	ENSOARG00000000245	0.985398425	0.000318252
MSTRG.22928	ENSOARG00000000245	-0.985388786	0.000318672
MSTRG.22953	ENSOARG00000000245	0.924043543	0.008434964
MSTRG.22962	ENSOARG00000000245	0.97298284	0.00108503
MSTRG.22965	ENSOARG00000000245	-0.928983621	0.00738591
MSTRG.23139	ENSOARG00000000245	-0.949029384	0.003830795
MSTRG.23223	ENSOARG00000000245	0.932551182	0.006670591
MSTRG.23224	ENSOARG00000000245	-0.9249901	0.008228707
MSTRG.23236	ENSOARG00000000245	0.991927856	9.75E-05
MSTRG.23265	ENSOARG00000000245	0.934856992	0.006227196
MSTRG.23281	ENSOARG00000000245	0.984326234	0.000366575
MSTRG.23291	ENSOARG00000000245	-0.93924696	0.00542428
MSTRG.23316	ENSOARG00000000245	-0.985546887	0.000311829
MSTRG.23325	ENSOARG00000000245	-0.939717339	0.005341465
MSTRG.23357	ENSOARG00000000245	0.942932634	0.004792101
MSTRG.23377	ENSOARG00000000245	0.949745112	0.00372487
MSTRG.23384	ENSOARG00000000245	-0.966054522	0.001708886
MSTRG.23400	ENSOARG00000000245	0.961505981	0.002194164
MSTRG.23407	ENSOARG00000000245	0.971065093	0.001243731
MSTRG.23445	ENSOARG00000000245	0.972819377	0.001098139
MSTRG.23527	ENSOARG00000000245	-0.930031829	0.007172051
MSTRG.23533	ENSOARG00000000245	-0.92707403	0.007783378
MSTRG.23571	ENSOARG00000000245	0.940239998	0.005250178
MSTRG.23578	ENSOARG00000000245	-0.928071154	0.007574567
MSTRG.23594	ENSOARG00000000245	0.97805593	0.00071703
MSTRG.23610	ENSOARG00000000245	0.972138192	0.001153606
MSTRG.2364	ENSOARG00000000245	-0.92070001	0.009183394
MSTRG.23640	ENSOARG00000000245	0.927920081	0.007606026
MSTRG.23653	ENSOARG00000000245	-0.951344064	0.003493506
MSTRG.23755	ENSOARG00000000245	0.936332081	0.005951364
MSTRG.23784	ENSOARG00000000245	0.982339655	0.000465078
MSTRG.23791	ENSOARG00000000245	0.960759278	0.002279539
MSTRG.23819	ENSOARG00000000245	-0.922686434	0.008735015
MSTRG.23854	ENSOARG00000000245	-0.921779602	0.008938353
MSTRG.23887	ENSOARG00000000245	0.942571075	0.00485242
MSTRG.23908	ENSOARG00000000245	-0.918490654	0.009694895
MSTRG.2395	ENSOARG00000000245	0.948801267	0.003864862
MSTRG.24016	ENSOARG00000000245	0.939017472	0.00546491
MSTRG.24051	ENSOARG00000000245	-0.946098987	0.004279679
MSTRG.2407	ENSOARG00000000245	-0.940472441	0.005209827
MSTRG.2409	ENSOARG00000000245	0.918755137	0.009632954
MSTRG.24138	ENSOARG00000000245	0.922382573	0.008802896
MSTRG.2419	ENSOARG00000000245	0.984100506	0.000377181
MSTRG.24192	ENSOARG00000000245	0.95957279	0.002418503
MSTRG.24235	ENSOARG00000000245	0.982668007	0.000447994
MSTRG.2427	ENSOARG00000000245	0.96419153	0.001900412
MSTRG.24280	ENSOARG00000000245	-0.926853607	0.007829911
MSTRG.24402	ENSOARG00000000245	-0.92044405	0.009241963
MSTRG.24412	ENSOARG00000000245	-0.970802721	0.001266277
MSTRG.24432	ENSOARG00000000245	0.973069641	0.001078101
MSTRG.24455	ENSOARG00000000245	0.977497456	0.000753849
MSTRG.24462	ENSOARG00000000245	0.971870777	0.001175751
MSTRG.24473	ENSOARG00000000245	0.961583953	0.002185342
MSTRG.24489	ENSOARG00000000245	0.97881215	0.000668632
MSTRG.24546	ENSOARG00000000245	0.952674508	0.003306556
MSTRG.24550	ENSOARG00000000245	-0.940136342	0.005268221
MSTRG.24607	ENSOARG00000000245	0.954930763	0.003001081
MSTRG.24670	ENSOARG00000000245	0.930279721	0.007121924
MSTRG.24850	ENSOARG00000000245	0.974641899	0.000956397
MSTRG.24874	ENSOARG00000000245	0.968170184	0.001503582
MSTRG.24881	ENSOARG00000000245	0.93005167	0.007168033
MSTRG.24893	ENSOARG00000000245	-0.926832878	0.007834294
MSTRG.2490	ENSOARG00000000245	0.932499328	0.006680733
MSTRG.24965	ENSOARG00000000245	-0.921302627	0.009046217
MSTRG.25031	ENSOARG00000000245	0.917909296	0.009831726
MSTRG.25061	ENSOARG00000000245	-0.963868168	0.001934679
MSTRG.25082	ENSOARG00000000245	0.91915979	0.009538558
MSTRG.25115	ENSOARG00000000245	-0.965712439	0.0017433
MSTRG.25116	ENSOARG00000000245	0.944296092	0.004567966
MSTRG.2573	ENSOARG00000000245	-0.933751194	0.006437977
MSTRG.2627	ENSOARG00000000245	-0.918976104	0.009581352
MSTRG.2633	ENSOARG00000000245	-0.94662368	0.004197512
MSTRG.2657	ENSOARG00000000245	-0.930510519	0.007075407
MSTRG.2659	ENSOARG00000000245	0.920034107	0.009336143
MSTRG.2706	ENSOARG00000000245	0.963699119	0.001952713
MSTRG.2710	ENSOARG00000000245	0.936425425	0.005934114
MSTRG.2735	ENSOARG00000000245	-0.938536008	0.005550633
MSTRG.2750	ENSOARG00000000245	-0.970686337	0.001276342
MSTRG.2783	ENSOARG00000000245	0.936731006	0.005877817
MSTRG.2789	ENSOARG00000000245	0.924030598	0.008437802
MSTRG.2825	ENSOARG00000000245	0.948114711	0.003968285
MSTRG.2927	ENSOARG00000000245	0.976836118	0.000798634
MSTRG.2945	ENSOARG00000000245	0.991753252	0.000101733
MSTRG.3060	ENSOARG00000000245	0.948304892	0.003939502
MSTRG.3081	ENSOARG00000000245	0.929499216	0.007280334
MSTRG.3100	ENSOARG00000000245	-0.918781757	0.00962673
MSTRG.3112	ENSOARG00000000245	0.940798122	0.005153546
MSTRG.3117	ENSOARG00000000245	0.933310924	0.006522852
MSTRG.3123	ENSOARG00000000245	-0.948606873	0.003894009
MSTRG.3134	ENSOARG00000000245	-0.91798294	0.009814341
MSTRG.3159	ENSOARG00000000245	0.920331737	0.00926772
MSTRG.320	ENSOARG00000000245	-0.952340539	0.003353009
MSTRG.3224	ENSOARG00000000245	-0.94583024	0.004322068
MSTRG.3247	ENSOARG00000000245	0.973777366	0.001022424
MSTRG.326	ENSOARG00000000245	0.948343238	0.003933711
MSTRG.3290	ENSOARG00000000245	0.932501394	0.006680329
MSTRG.3320	ENSOARG00000000245	0.965973	0.001717056
MSTRG.3328	ENSOARG00000000245	0.920954118	0.009125428
MSTRG.3360	ENSOARG00000000245	0.933522901	0.006481919
MSTRG.3362	ENSOARG00000000245	0.930371974	0.007103313
MSTRG.3407	ENSOARG00000000245	0.931692067	0.006839599
MSTRG.3780	ENSOARG00000000245	0.921277355	0.00905195
MSTRG.3804	ENSOARG00000000245	0.927833794	0.007624023
MSTRG.3809	ENSOARG00000000245	0.92937187	0.007306341
MSTRG.3825	ENSOARG00000000245	0.920360543	0.00926111
MSTRG.3848	ENSOARG00000000245	0.954044929	0.003119277
MSTRG.3873	ENSOARG00000000245	0.922793857	0.008711078
MSTRG.3894	ENSOARG00000000245	0.997273083	1.11E-05
MSTRG.3959	ENSOARG00000000245	0.91966354	0.009421677
MSTRG.3980	ENSOARG00000000245	0.977992261	0.000721181
MSTRG.3981	ENSOARG00000000245	0.934306668	0.006331667
MSTRG.4016	ENSOARG00000000245	0.927377411	0.007719553
MSTRG.4045	ENSOARG00000000245	0.984674043	0.000350528
MSTRG.4055	ENSOARG00000000245	0.927488105	0.00769633
MSTRG.4059	ENSOARG00000000245	0.954821663	0.003015517
MSTRG.407	ENSOARG00000000245	-0.921763203	0.008942051
MSTRG.4134	ENSOARG00000000245	0.986076128	0.000289462
MSTRG.4157	ENSOARG00000000245	0.993513575	6.30E-05
MSTRG.4239	ENSOARG00000000245	-0.98089676	0.000543915
MSTRG.4287	ENSOARG00000000245	-0.962628736	0.00206882
MSTRG.4296	ENSOARG00000000245	-0.947222202	0.004104738
MSTRG.4312	ENSOARG00000000245	0.958832509	0.002507259
MSTRG.4357	ENSOARG00000000245	-0.966796621	0.001635394
MSTRG.4482	ENSOARG00000000245	-0.947417063	0.004074753
MSTRG.4497	ENSOARG00000000245	0.989409312	0.00016765
MSTRG.4566	ENSOARG00000000245	0.957160658	0.002713504
MSTRG.4591	ENSOARG00000000245	0.933314166	0.006522225
MSTRG.4606	ENSOARG00000000245	-0.920920766	0.009133026
MSTRG.4645	ENSOARG00000000245	0.943986409	0.004618412
MSTRG.4683	ENSOARG00000000245	0.985734484	0.000303806
MSTRG.4764	ENSOARG00000000245	0.918513764	0.009689476
MSTRG.4768	ENSOARG00000000245	0.951826632	0.003425113
MSTRG.4791	ENSOARG00000000245	0.952011015	0.003399156
MSTRG.4822	ENSOARG00000000245	-0.928423239	0.007501497
MSTRG.4826	ENSOARG00000000245	-0.954266641	0.003089484
MSTRG.4843	ENSOARG00000000245	0.990267895	0.00014161
MSTRG.4878	ENSOARG00000000245	0.94052805	0.005200196
MSTRG.4901	ENSOARG00000000245	-0.933758651	0.006436544
MSTRG.4908	ENSOARG00000000245	-0.961738863	0.002167866
MSTRG.4911	ENSOARG00000000245	0.983453468	0.000408416
MSTRG.4940	ENSOARG00000000245	0.965160071	0.001799586
MSTRG.5	ENSOARG00000000245	0.951800494	0.0034288
MSTRG.5029	ENSOARG00000000245	0.946951954	0.004146502
MSTRG.5032	ENSOARG00000000245	0.923208297	0.008619029
MSTRG.5083	ENSOARG00000000245	0.921065369	0.009100106
MSTRG.5167	ENSOARG00000000245	0.940655383	0.005178176
MSTRG.52	ENSOARG00000000245	0.959333312	0.002447042
MSTRG.5300	ENSOARG00000000245	0.939471014	0.005384755
MSTRG.5304	ENSOARG00000000245	0.939943619	0.005301849
MSTRG.5315	ENSOARG00000000245	0.922799574	0.008709805
MSTRG.5345	ENSOARG00000000245	0.98240177	0.000461821
MSTRG.535	ENSOARG00000000245	0.935761697	0.006057298
MSTRG.5370	ENSOARG00000000245	0.924255335	0.008388598
MSTRG.548	ENSOARG00000000245	-0.928608592	0.007463168
MSTRG.5504	ENSOARG00000000245	0.92778732	0.007633724
MSTRG.5511	ENSOARG00000000245	-0.94290272	0.004797078
MSTRG.5560	ENSOARG00000000245	0.948806751	0.003864041
MSTRG.5588	ENSOARG00000000245	0.928429105	0.007500282
MSTRG.5616	ENSOARG00000000245	0.973664941	0.001031171
MSTRG.5628	ENSOARG00000000245	0.976690608	0.000808659
MSTRG.5630	ENSOARG00000000245	0.977940525	0.000724563
MSTRG.5648	ENSOARG00000000245	0.96063144	0.002294317
MSTRG.5692	ENSOARG00000000245	0.985950276	0.000294705
MSTRG.5713	ENSOARG00000000245	-0.934586764	0.006278389
MSTRG.5719	ENSOARG00000000245	0.925477511	0.008123468
MSTRG.5720	ENSOARG00000000245	0.918544966	0.00968216
MSTRG.5732	ENSOARG00000000245	-0.994161331	5.10E-05
MSTRG.5744	ENSOARG00000000245	0.941620211	0.005012815
MSTRG.5751	ENSOARG00000000245	0.946330327	0.004243355
MSTRG.5771	ENSOARG00000000245	0.966951083	0.001620298
MSTRG.5855	ENSOARG00000000245	0.926675009	0.007867714
MSTRG.5860	ENSOARG00000000245	0.952112183	0.003384955
MSTRG.5926	ENSOARG00000000245	0.9251183	0.008200962
MSTRG.5927	ENSOARG00000000245	0.939655277	0.005352356
MSTRG.5953	ENSOARG00000000245	0.979555002	0.000622724
MSTRG.5990	ENSOARG00000000245	0.97297818	0.001085403
MSTRG.6010	ENSOARG00000000245	0.97836769	0.000696874
MSTRG.6040	ENSOARG00000000245	0.983801501	0.000391462
MSTRG.610	ENSOARG00000000245	0.927345886	0.007726174
MSTRG.612	ENSOARG00000000245	0.993789369	5.77E-05
MSTRG.6176	ENSOARG00000000245	0.947806308	0.00401518
MSTRG.619	ENSOARG00000000245	-0.921691708	0.008958182
MSTRG.6201	ENSOARG00000000245	-0.939792231	0.005328337
MSTRG.627	ENSOARG00000000245	0.973434169	0.001049241
MSTRG.6275	ENSOARG00000000245	-0.977763936	0.000736167
MSTRG.628	ENSOARG00000000245	0.937178517	0.005795844
MSTRG.6287	ENSOARG00000000245	-0.952199006	0.003372791
MSTRG.630	ENSOARG00000000245	-0.939646119	0.005353964
MSTRG.635	ENSOARG00000000245	-0.963305682	0.001995005
MSTRG.6353	ENSOARG00000000245	0.954894672	0.003005853
MSTRG.638	ENSOARG00000000245	0.960618238	0.002295846
MSTRG.6388	ENSOARG00000000245	0.945629479	0.004353867
MSTRG.6476	ENSOARG00000000245	0.945655794	0.004349692
MSTRG.6496	ENSOARG00000000245	0.949966281	0.003692433
MSTRG.6503	ENSOARG00000000245	0.954046441	0.003119074
MSTRG.6586	ENSOARG00000000245	0.929448835	0.007290617
MSTRG.6589	ENSOARG00000000245	-0.966421868	0.001672307
MSTRG.659	ENSOARG00000000245	-0.948830373	0.003860507
MSTRG.6679	ENSOARG00000000245	0.965801255	0.001734333
MSTRG.6694	ENSOARG00000000245	0.927337544	0.007727926
MSTRG.6698	ENSOARG00000000245	-0.929549558	0.007270065
MSTRG.6789	ENSOARG00000000245	0.918237538	0.009754355
MSTRG.6797	ENSOARG00000000245	-0.937052237	0.005818919
MSTRG.6980	ENSOARG00000000245	-0.926858966	0.007828778
MSTRG.7009	ENSOARG00000000245	0.956927629	0.002742889
MSTRG.7027	ENSOARG00000000245	0.977003106	0.000787205
MSTRG.7044	ENSOARG00000000245	0.959381369	0.002441302
MSTRG.7057	ENSOARG00000000245	0.963952813	0.00192568
MSTRG.7105	ENSOARG00000000245	-0.98552635	0.000312714
MSTRG.711	ENSOARG00000000245	0.954810392	0.00301701
MSTRG.7118	ENSOARG00000000245	0.936175039	0.005980439
MSTRG.7427	ENSOARG00000000245	0.969193366	0.001408955
MSTRG.7428	ENSOARG00000000245	-0.988730797	0.000189777
MSTRG.7454	ENSOARG00000000245	0.926527501	0.007899002
MSTRG.7506	ENSOARG00000000245	-0.924436539	0.008349027
MSTRG.7645	ENSOARG00000000245	-0.920634292	0.009198414
MSTRG.7651	ENSOARG00000000245	-0.951138898	0.003522785
MSTRG.7657	ENSOARG00000000245	0.973581141	0.001037715
MSTRG.7662	ENSOARG00000000245	0.941914617	0.00496288
MSTRG.7676	ENSOARG00000000245	-0.955158648	0.002971038
MSTRG.7687	ENSOARG00000000245	0.939633579	0.005356166
MSTRG.7690	ENSOARG00000000245	0.954558028	0.003050541
MSTRG.7703	ENSOARG00000000245	-0.977104257	0.000780321
MSTRG.7708	ENSOARG00000000245	0.928833499	0.007416789
MSTRG.771	ENSOARG00000000245	0.925020906	0.008222036
MSTRG.7719	ENSOARG00000000245	0.933418405	0.006502081
MSTRG.7727	ENSOARG00000000245	0.93764179	0.005711578
MSTRG.7729	ENSOARG00000000245	-0.978043732	0.000717824
MSTRG.7791	ENSOARG00000000245	0.988933429	0.000183026
MSTRG.7794	ENSOARG00000000245	-0.944011501	0.004614314
MSTRG.7826	ENSOARG00000000245	-0.936951125	0.005837426
MSTRG.7831	ENSOARG00000000245	-0.926031384	0.00800468
MSTRG.7838	ENSOARG00000000245	-0.92371019	0.008508194
MSTRG.7848	ENSOARG00000000245	0.972585557	0.001117026
MSTRG.7868	ENSOARG00000000245	0.981830388	0.000492203
MSTRG.7926	ENSOARG00000000245	-0.959210799	0.002461707
MSTRG.7933	ENSOARG00000000245	-0.934559382	0.006283588
MSTRG.7975	ENSOARG00000000245	-0.933116237	0.006560557
MSTRG.80	ENSOARG00000000245	0.920878876	0.009142573
MSTRG.8010	ENSOARG00000000245	-0.949868356	0.003706778
MSTRG.802	ENSOARG00000000245	0.922448291	0.008788193
MSTRG.8035	ENSOARG00000000245	0.972829677	0.001097311
MSTRG.8059	ENSOARG00000000245	-0.920995642	0.009115972
MSTRG.8074	ENSOARG00000000245	0.954932275	0.003000881
MSTRG.8089	ENSOARG00000000245	0.919298441	0.009506318
MSTRG.8116	ENSOARG00000000245	0.979627893	0.000618307
MSTRG.8180	ENSOARG00000000245	0.935988295	0.006015104
MSTRG.8211	ENSOARG00000000245	-0.925986136	0.008014352
MSTRG.8223	ENSOARG00000000245	0.927139742	0.007769532
MSTRG.8261	ENSOARG00000000245	0.961639996	0.002179012
MSTRG.8285	ENSOARG00000000245	-0.961917971	0.002147747
MSTRG.8313	ENSOARG00000000245	-0.92098344	0.009118751
MSTRG.8328	ENSOARG00000000245	0.971423088	0.001213291
MSTRG.8332	ENSOARG00000000245	0.937061034	0.00581731
MSTRG.8361	ENSOARG00000000245	0.936013197	0.006010476
MSTRG.8387	ENSOARG00000000245	0.990652606	0.000130652
MSTRG.8430	ENSOARG00000000245	0.933931985	0.006403281
MSTRG.8521	ENSOARG00000000245	-0.977715419	0.000739371
MSTRG.8523	ENSOARG00000000245	0.920780045	0.009165118
MSTRG.8526	ENSOARG00000000245	0.942688184	0.004832842
MSTRG.8535	ENSOARG00000000245	0.945744847	0.004335579
MSTRG.8536	ENSOARG00000000245	-0.95832164	0.002569429
MSTRG.8541	ENSOARG00000000245	-0.941478788	0.005036889
MSTRG.8574	ENSOARG00000000245	0.936976546	0.00583277
MSTRG.8575	ENSOARG00000000245	0.946466258	0.004222082
MSTRG.8595	ENSOARG00000000245	0.949214845	0.003803207
MSTRG.8618	ENSOARG00000000245	0.9264828	0.007908496
MSTRG.8620	ENSOARG00000000245	0.934194784	0.006353011
MSTRG.8637	ENSOARG00000000245	0.984681727	0.000350177
MSTRG.8660	ENSOARG00000000245	0.942991079	0.004782386
MSTRG.8661	ENSOARG00000000245	0.924325306	0.008373307
MSTRG.8711	ENSOARG00000000245	0.9317083	0.006836387
MSTRG.8722	ENSOARG00000000245	0.973102499	0.001075483
MSTRG.8920	ENSOARG00000000245	-0.923317377	0.008594881
MSTRG.8934	ENSOARG00000000245	-0.94990827	0.003700928
MSTRG.8959	ENSOARG00000000245	0.940328699	0.005234761
MSTRG.8969	ENSOARG00000000245	0.918953874	0.009586537
MSTRG.9043	ENSOARG00000000245	-0.923426162	0.008570832
MSTRG.9060	ENSOARG00000000245	-0.953856864	0.00314466
MSTRG.9069	ENSOARG00000000245	0.930636431	0.007050092
MSTRG.914	ENSOARG00000000245	0.980192156	0.00058464
MSTRG.9157	ENSOARG00000000245	0.95218239	0.003375118
MSTRG.9172	ENSOARG00000000245	0.952494817	0.00333151
MSTRG.9190	ENSOARG00000000245	0.964223468	0.001897044
MSTRG.9212	ENSOARG00000000245	0.923604295	0.008531521
MSTRG.9221	ENSOARG00000000245	-0.947844843	0.004009305
MSTRG.9268	ENSOARG00000000245	-0.923032846	0.00865794
MSTRG.9287	ENSOARG00000000245	-0.966598789	0.001654829
MSTRG.9299	ENSOARG00000000245	-0.971675271	0.001192073
MSTRG.9394	ENSOARG00000000245	-0.921773298	0.008939774
MSTRG.9401	ENSOARG00000000245	-0.944917165	0.004467614
MSTRG.9402	ENSOARG00000000245	0.954616557	0.003042748
MSTRG.9412	ENSOARG00000000245	0.954175401	0.003101727
MSTRG.9448	ENSOARG00000000245	0.931818191	0.006814658
MSTRG.9531	ENSOARG00000000245	0.968808709	0.001444172
MSTRG.9560	ENSOARG00000000245	-0.918580127	0.00967392
MSTRG.9585	ENSOARG00000000245	0.945136166	0.004432489
MSTRG.9603	ENSOARG00000000245	-0.930094506	0.007159361
MSTRG.9622	ENSOARG00000000245	0.990950768	0.000122462
MSTRG.9684	ENSOARG00000000245	0.95338381	0.003208954
MSTRG.9757	ENSOARG00000000245	0.940086731	0.005276867
MSTRG.9785	ENSOARG00000000245	-0.927719341	0.007647926
MSTRG.9788	ENSOARG00000000245	0.991171726	0.000116564
MSTRG.9796	ENSOARG00000000245	-0.945990689	0.004296736
MSTRG.9797	ENSOARG00000000245	-0.944164097	0.004589434
MSTRG.9798	ENSOARG00000000245	-0.9432502	0.004739427
MSTRG.9823	ENSOARG00000000245	-0.945346146	0.004398939
MSTRG.9880	ENSOARG00000000245	0.960466258	0.002313481
MSTRG.9884	ENSOARG00000000245	0.969882053	0.001346976
MSTRG.9910	ENSOARG00000000245	0.925877221	0.008037657
MSTRG.9914	ENSOARG00000000245	-0.929114698	0.007358999
MSTRG.9954	ENSOARG00000000245	0.935038712	0.006192886
MSTRG.9971	ENSOARG00000000245	0.931292738	0.006918859
MSTRG.10990	ENSOARG00000020655	0.918007104	0.00980864
MSTRG.11043	ENSOARG00000020655	0.97179523	0.001182045
MSTRG.11287	ENSOARG00000020655	0.925161615	0.008191599
MSTRG.11645	ENSOARG00000020655	0.947095182	0.004124341
MSTRG.11745	ENSOARG00000020655	0.973944406	0.001009497
MSTRG.12407	ENSOARG00000020655	0.958323687	0.002569179
MSTRG.13151	ENSOARG00000020655	0.990477093	0.000135597
MSTRG.13286	ENSOARG00000020655	0.96365838	0.001957072
MSTRG.13446	ENSOARG00000020655	-0.927673403	0.00765753
MSTRG.13536	ENSOARG00000020655	0.925180565	0.008187504
MSTRG.1424	ENSOARG00000020655	0.984479864	0.000359443
MSTRG.14476	ENSOARG00000020655	0.977810186	0.000733119
MSTRG.14512	ENSOARG00000020655	0.990701108	0.000129302
MSTRG.14718	ENSOARG00000020655	0.927351574	0.007724979
MSTRG.1492	ENSOARG00000020655	0.975413595	0.000899306
MSTRG.14938	ENSOARG00000020655	-0.948816881	0.003862525
MSTRG.15455	ENSOARG00000020655	0.994110975	5.19E-05
MSTRG.16337	ENSOARG00000020655	0.96826823	0.001494382
MSTRG.16556	ENSOARG00000020655	0.917717502	0.009877071
MSTRG.1664	ENSOARG00000020655	0.96741145	0.001575716
MSTRG.16960	ENSOARG00000020655	0.94725578	0.004099563
MSTRG.17558	ENSOARG00000020655	0.946351738	0.00424
MSTRG.18225	ENSOARG00000020655	0.92348963	0.008556815
MSTRG.18508	ENSOARG00000020655	0.992936785	7.47E-05
MSTRG.18766	ENSOARG00000020655	0.939777089	0.00533099
MSTRG.1967	ENSOARG00000020655	0.964362355	0.001882432
MSTRG.19835	ENSOARG00000020655	0.917573435	0.009911199
MSTRG.19857	ENSOARG00000020655	0.960558099	0.002302816
MSTRG.1987	ENSOARG00000020655	0.921383392	0.009027909
MSTRG.2001	ENSOARG00000020655	0.924358205	0.008366123
MSTRG.20523	ENSOARG00000020655	0.947076303	0.004127259
MSTRG.20771	ENSOARG00000020655	0.943405438	0.004713782
MSTRG.21259	ENSOARG00000020655	0.962572547	0.002075007
MSTRG.21762	ENSOARG00000020655	0.937159096	0.00579939
MSTRG.21807	ENSOARG00000020655	0.966588278	0.001655865
MSTRG.22219	ENSOARG00000020655	0.936878285	0.005850777
MSTRG.22863	ENSOARG00000020655	0.954714558	0.003029722
MSTRG.23650	ENSOARG00000020655	-0.984270465	0.000369182
MSTRG.2476	ENSOARG00000020655	0.98801719	0.000214521
MSTRG.2629	ENSOARG00000020655	0.936148337	0.00598539
MSTRG.2651	ENSOARG00000020655	0.92123505	0.00906155
MSTRG.2735	ENSOARG00000020655	0.930792057	0.007018865
MSTRG.2789	ENSOARG00000020655	-0.917651129	0.009892787
MSTRG.2850	ENSOARG00000020655	0.982956174	0.000433262
MSTRG.2944	ENSOARG00000020655	-0.924487415	0.008337934
MSTRG.3881	ENSOARG00000020655	-0.943665836	0.004670918
MSTRG.4276	ENSOARG00000020655	0.969439392	0.001386655
MSTRG.4341	ENSOARG00000020655	0.942632844	0.004842088
MSTRG.4533	ENSOARG00000020655	0.958248521	0.002578389
MSTRG.4591	ENSOARG00000020655	-0.932700382	0.00664145
MSTRG.4869	ENSOARG00000020655	0.924847723	0.008259572
MSTRG.5572	ENSOARG00000020655	-0.948024228	0.003982015
MSTRG.5786	ENSOARG00000020655	0.972991013	0.001084377
MSTRG.5926	ENSOARG00000020655	-0.921585745	0.008982116
MSTRG.7125	ENSOARG00000020655	0.944605884	0.004517774
MSTRG.7480	ENSOARG00000020655	0.918785426	0.009625873
MSTRG.7667	ENSOARG00000020655	-0.927563033	0.007680629
MSTRG.7706	ENSOARG00000020655	-0.91925467	0.00951649
MSTRG.8465	ENSOARG00000020655	0.967429907	0.001573941
MSTRG.8516	ENSOARG00000020655	-0.931433775	0.006890815
MSTRG.8581	ENSOARG00000020655	0.921142027	0.009082678
MSTRG.9856	ENSOARG00000020655	0.963881993	0.001933207
MSTRG.10044	ENSOARG00000019326	0.926316873	0.007943785
MSTRG.10275	ENSOARG00000019326	0.918354816	0.009726783
MSTRG.10320	ENSOARG00000019326	-0.934690612	0.006258692
MSTRG.10370	ENSOARG00000019326	0.921787007	0.008936683
MSTRG.10399	ENSOARG00000019326	0.927248078	0.007746731
MSTRG.10541	ENSOARG00000019326	0.923400194	0.00857657
MSTRG.11121	ENSOARG00000019326	0.942099689	0.004931615
MSTRG.11172	ENSOARG00000019326	0.96276929	0.002053385
MSTRG.11314	ENSOARG00000019326	0.981427362	0.000514211
MSTRG.1134	ENSOARG00000019326	0.927894697	0.007611318
MSTRG.11402	ENSOARG00000019326	0.956337406	0.002818014
MSTRG.11406	ENSOARG00000019326	0.991099009	0.000118489
MSTRG.11478	ENSOARG00000019326	-0.931396106	0.006898299
MSTRG.11581	ENSOARG00000019326	0.94798118	0.003988556
MSTRG.1167	ENSOARG00000019326	0.927136351	0.007770246
MSTRG.11865	ENSOARG00000019326	-0.928990296	0.007384538
MSTRG.11866	ENSOARG00000019326	-0.95409661	0.00311232
MSTRG.11877	ENSOARG00000019326	0.973516117	0.001042806
MSTRG.12798	ENSOARG00000019326	0.919547628	0.009448509
MSTRG.12812	ENSOARG00000019326	0.963135663	0.00201342
MSTRG.12984	ENSOARG00000019326	-0.925473441	0.008124344
MSTRG.13004	ENSOARG00000019326	0.957128566	0.002717542
MSTRG.13031	ENSOARG00000019326	0.918190045	0.009765532
MSTRG.13115	ENSOARG00000019326	0.920335615	0.00926683
MSTRG.13221	ENSOARG00000019326	0.92252349	0.008771384
MSTRG.13450	ENSOARG00000019326	0.956241979	0.002830254
MSTRG.13872	ENSOARG00000019326	0.960615842	0.002296123
MSTRG.13890	ENSOARG00000019326	0.967972122	0.001522251
MSTRG.14033	ENSOARG00000019326	0.93801049	0.005644945
MSTRG.14093	ENSOARG00000019326	0.937410094	0.005753647
MSTRG.14298	ENSOARG00000019326	0.943426574	0.004710296
MSTRG.14404	ENSOARG00000019326	0.936981137	0.00583193
MSTRG.14445	ENSOARG00000019326	0.932267297	0.006726209
MSTRG.14481	ENSOARG00000019326	0.941039019	0.00511211
MSTRG.1460	ENSOARG00000019326	0.943169096	0.004752853
MSTRG.14729	ENSOARG00000019326	0.930655417	0.007046279
MSTRG.15011	ENSOARG00000019326	0.984907789	0.000339943
MSTRG.15016	ENSOARG00000019326	0.941792916	0.004983492
MSTRG.1513	ENSOARG00000019326	0.923155282	0.008630778
MSTRG.15268	ENSOARG00000019326	0.933840213	0.006420882
MSTRG.15301	ENSOARG00000019326	0.941675997	0.005003334
MSTRG.15578	ENSOARG00000019326	0.918615634	0.009665601
MSTRG.15683	ENSOARG00000019326	0.962029034	0.002135318
MSTRG.15720	ENSOARG00000019326	0.944686381	0.004504776
MSTRG.1647	ENSOARG00000019326	0.951043758	0.003536403
MSTRG.16488	ENSOARG00000019326	0.922066747	0.00887372
MSTRG.16638	ENSOARG00000019326	-0.953025243	0.003258114
MSTRG.16804	ENSOARG00000019326	0.928248102	0.007537801
MSTRG.17162	ENSOARG00000019326	0.960013272	0.002366439
MSTRG.17195	ENSOARG00000019326	0.931672876	0.006843398
MSTRG.17792	ENSOARG00000019326	0.937287236	0.005776015
MSTRG.1790	ENSOARG00000019326	0.963377063	0.001987299
MSTRG.18111	ENSOARG00000019326	0.989645342	0.000160273
MSTRG.18127	ENSOARG00000019326	0.953755798	0.003158342
MSTRG.18540	ENSOARG00000019326	-0.918177825	0.009768408
MSTRG.189	ENSOARG00000019326	0.960145216	0.002350953
MSTRG.18978	ENSOARG00000019326	0.953578589	0.003182403
MSTRG.19089	ENSOARG00000019326	0.924885105	0.008251463
MSTRG.19097	ENSOARG00000019326	0.956176192	0.002838707
MSTRG.19202	ENSOARG00000019326	0.933309744	0.00652308
MSTRG.19232	ENSOARG00000019326	0.917690857	0.009883379
MSTRG.19243	ENSOARG00000019326	0.917319881	0.009971402
MSTRG.19265	ENSOARG00000019326	0.951818105	0.003426315
MSTRG.19343	ENSOARG00000019326	0.92939528	0.007301556
MSTRG.1936	ENSOARG00000019326	0.975782319	0.000872642
MSTRG.20179	ENSOARG00000019326	0.961480219	0.002197083
MSTRG.20985	ENSOARG00000019326	0.933544882	0.006477682
MSTRG.21	ENSOARG00000019326	0.930719706	0.007033374
MSTRG.21170	ENSOARG00000019326	0.970646609	0.001279787
MSTRG.21213	ENSOARG00000019326	0.928734929	0.007437098
MSTRG.21254	ENSOARG00000019326	0.936910237	0.005844919
MSTRG.21393	ENSOARG00000019326	0.958722405	0.002520595
MSTRG.21963	ENSOARG00000019326	0.928135044	0.007561282
MSTRG.22000	ENSOARG00000019326	0.949830091	0.00371239
MSTRG.22092	ENSOARG00000019326	0.936324199	0.005952821
MSTRG.22111	ENSOARG00000019326	0.930563605	0.007064729
MSTRG.22468	ENSOARG00000019326	0.996500316	1.84E-05
MSTRG.22765	ENSOARG00000019326	0.937088776	0.005812237
MSTRG.23145	ENSOARG00000019326	0.981566909	0.000506537
MSTRG.23223	ENSOARG00000019326	0.96673107	0.001641821
MSTRG.23445	ENSOARG00000019326	0.951984223	0.003402922
MSTRG.23590	ENSOARG00000019326	0.9532124	0.003232408
MSTRG.23610	ENSOARG00000019326	0.936523923	0.005915939
MSTRG.23640	ENSOARG00000019326	0.976592512	0.000815453
MSTRG.23730	ENSOARG00000019326	0.965949388	0.001719426
MSTRG.23843	ENSOARG00000019326	0.935054348	0.006189938
MSTRG.24052	ENSOARG00000019326	0.966359873	0.001678453
MSTRG.2409	ENSOARG00000019326	0.925812624	0.008051495
MSTRG.24110	ENSOARG00000019326	0.986955364	0.000254134
MSTRG.24192	ENSOARG00000019326	0.942864704	0.004803406
MSTRG.24670	ENSOARG00000019326	0.978638664	0.000679586
MSTRG.24850	ENSOARG00000019326	0.940998521	0.005119065
MSTRG.3579	ENSOARG00000019326	0.931629054	0.006852077
MSTRG.4141	ENSOARG00000019326	0.947031694	0.004134157
MSTRG.4147	ENSOARG00000019326	0.940928085	0.005131171
MSTRG.4482	ENSOARG00000019326	-0.929469318	0.007286436
MSTRG.4566	ENSOARG00000019326	0.925638856	0.008088777
MSTRG.4791	ENSOARG00000019326	0.976750638	0.000804516
MSTRG.4878	ENSOARG00000019326	0.953347357	0.003213935
MSTRG.5	ENSOARG00000019326	0.932679969	0.006645433
MSTRG.5083	ENSOARG00000019326	0.950829689	0.003567139
MSTRG.5860	ENSOARG00000019326	0.928404088	0.007505462
MSTRG.5909	ENSOARG00000019326	0.926683445	0.007865926
MSTRG.5957	ENSOARG00000019326	0.969456132	0.001385144
MSTRG.610	ENSOARG00000019326	0.949865575	0.003707185
MSTRG.6108	ENSOARG00000019326	0.963165053	0.002010231
MSTRG.6789	ENSOARG00000019326	0.993825262	5.71E-05
MSTRG.6889	ENSOARG00000019326	0.927342697	0.007726844
MSTRG.7007	ENSOARG00000019326	0.976026809	0.000855182
MSTRG.7133	ENSOARG00000019326	0.942656849	0.004838077
MSTRG.7598	ENSOARG00000019326	0.940425112	0.00521803
MSTRG.7657	ENSOARG00000019326	0.923601978	0.008532032
MSTRG.771	ENSOARG00000019326	0.971442355	0.001211664
MSTRG.7719	ENSOARG00000019326	0.958532231	0.00254371
MSTRG.7753	ENSOARG00000019326	0.982550754	0.000454058
MSTRG.7791	ENSOARG00000019326	0.928565838	0.007472001
MSTRG.8177	ENSOARG00000019326	0.984515024	0.00035782
MSTRG.8211	ENSOARG00000019326	-0.938572911	0.00554404
MSTRG.8320	ENSOARG00000019326	0.963145034	0.002012403
MSTRG.8361	ENSOARG00000019326	0.944787305	0.004488506
MSTRG.8483	ENSOARG00000019326	0.953365903	0.0032114
MSTRG.8521	ENSOARG00000019326	-0.933858427	0.006417386
MSTRG.8526	ENSOARG00000019326	0.936374184	0.00594358
MSTRG.8562	ENSOARG00000019326	0.965738192	0.001740698
MSTRG.8637	ENSOARG00000019326	0.946126728	0.004275315
MSTRG.8756	ENSOARG00000019326	0.920195739	0.009298955
MSTRG.8774	ENSOARG00000019326	0.973987749	0.001006155
MSTRG.8832	ENSOARG00000019326	0.918148236	0.009775375
MSTRG.8959	ENSOARG00000019326	0.933562769	0.006474235
MSTRG.9402	ENSOARG00000019326	0.918490608	0.009694906
MSTRG.9410	ENSOARG00000019326	0.952106093	0.003385809
MSTRG.9585	ENSOARG00000019326	0.943134857	0.004758526
MSTRG.9681	ENSOARG00000019326	0.96097958	0.002254184
MSTRG.10040	ENSOARG00000004289	0.979474432	0.000627625
MSTRG.10044	ENSOARG00000004289	0.9612618	0.002221906
MSTRG.10125	ENSOARG00000004289	0.971912044	0.00117232
MSTRG.10126	ENSOARG00000004289	0.973336288	0.001056952
MSTRG.10156	ENSOARG00000004289	0.99853218	3.23E-06
MSTRG.10275	ENSOARG00000004289	0.936648744	0.005892946
MSTRG.10289	ENSOARG00000004289	0.955057428	0.002984364
MSTRG.10303	ENSOARG00000004289	0.955668691	0.002904336
MSTRG.10319	ENSOARG00000004289	-0.923855712	0.008476188
MSTRG.10320	ENSOARG00000004289	-0.97884733	0.000666421
MSTRG.10341	ENSOARG00000004289	0.970395716	0.001301648
MSTRG.10399	ENSOARG00000004289	0.970957637	0.00125294
MSTRG.10421	ENSOARG00000004289	0.940759417	0.005160219
MSTRG.10422	ENSOARG00000004289	-0.920671392	0.009189934
MSTRG.10452	ENSOARG00000004289	0.966502432	0.001664337
MSTRG.1049	ENSOARG00000004289	-0.965068162	0.001809038
MSTRG.10541	ENSOARG00000004289	0.94092734	0.005131299
MSTRG.10567	ENSOARG00000004289	-0.966748291	0.001640131
MSTRG.10590	ENSOARG00000004289	0.99668886	1.64E-05
MSTRG.10628	ENSOARG00000004289	0.943086996	0.004766462
MSTRG.10637	ENSOARG00000004289	0.918523903	0.009687098
MSTRG.10658	ENSOARG00000004289	0.941202913	0.005084013
MSTRG.10690	ENSOARG00000004289	-0.948263154	0.00394581
MSTRG.1071	ENSOARG00000004289	0.948756591	0.003871551
MSTRG.10740	ENSOARG00000004289	-0.938112689	0.005626543
MSTRG.10792	ENSOARG00000004289	-0.948259961	0.003946293
MSTRG.10892	ENSOARG00000004289	-0.931365712	0.006904342
MSTRG.10893	ENSOARG00000004289	-0.939149085	0.00544159
MSTRG.10952	ENSOARG00000004289	-0.961555085	0.002188606
MSTRG.10953	ENSOARG00000004289	0.942325367	0.004893622
MSTRG.10998	ENSOARG00000004289	-0.917952585	0.009821505
MSTRG.1102	ENSOARG00000004289	-0.940241794	0.005249865
MSTRG.11022	ENSOARG00000004289	0.95798899	0.002610314
MSTRG.11037	ENSOARG00000004289	0.978854715	0.000665957
MSTRG.11048	ENSOARG00000004289	-0.965458095	0.001769108
MSTRG.11099	ENSOARG00000004289	-0.97071199	0.00127412
MSTRG.11103	ENSOARG00000004289	-0.928023214	0.007584543
MSTRG.11156	ENSOARG00000004289	0.969602862	0.001371936
MSTRG.1117	ENSOARG00000004289	0.93806172	0.005635717
MSTRG.11268	ENSOARG00000004289	-0.96799783	0.001519821
MSTRG.11284	ENSOARG00000004289	-0.983433864	0.000409382
MSTRG.11288	ENSOARG00000004289	-0.923118886	0.008638848
MSTRG.11305	ENSOARG00000004289	0.967276765	0.001588695
MSTRG.11311	ENSOARG00000004289	0.964207416	0.001898736
MSTRG.11314	ENSOARG00000004289	0.936951083	0.005837434
MSTRG.1134	ENSOARG00000004289	0.944989058	0.004456068
MSTRG.11343	ENSOARG00000004289	-0.935016911	0.006196997
MSTRG.11368	ENSOARG00000004289	0.960128326	0.002352933
MSTRG.11402	ENSOARG00000004289	0.954520836	0.003055498
MSTRG.11424	ENSOARG00000004289	-0.948487109	0.00391202
MSTRG.11435	ENSOARG00000004289	-0.919635663	0.009428126
MSTRG.11478	ENSOARG00000004289	-0.972469454	0.001126463
MSTRG.11504	ENSOARG00000004289	-0.940050691	0.005283153
MSTRG.11510	ENSOARG00000004289	-0.927437008	0.007707046
MSTRG.11541	ENSOARG00000004289	0.98951204	0.000164419
MSTRG.11574	ENSOARG00000004289	0.934784187	0.006240969
MSTRG.11665	ENSOARG00000004289	-0.966009083	0.001713437
MSTRG.11689	ENSOARG00000004289	-0.956726919	0.002768324
MSTRG.11723	ENSOARG00000004289	0.961721841	0.002169783
MSTRG.11725	ENSOARG00000004289	-0.91796544	0.009818471
MSTRG.11743	ENSOARG00000004289	0.957782038	0.002635911
MSTRG.11749	ENSOARG00000004289	-0.929930653	0.00719256
MSTRG.11767	ENSOARG00000004289	0.962557108	0.002076708
MSTRG.11814	ENSOARG00000004289	0.934840584	0.006230299
MSTRG.11865	ENSOARG00000004289	-0.938530215	0.005551669
MSTRG.11866	ENSOARG00000004289	-0.952379439	0.003347582
MSTRG.11903	ENSOARG00000004289	0.979717069	0.000612924
MSTRG.11940	ENSOARG00000004289	0.975602001	0.000885632
MSTRG.11975	ENSOARG00000004289	0.938045121	0.005638706
MSTRG.120	ENSOARG00000004289	0.958770211	0.0025148
MSTRG.12057	ENSOARG00000004289	0.941598203	0.005016557
MSTRG.12075	ENSOARG00000004289	0.963295165	0.001996142
MSTRG.1208	ENSOARG00000004289	0.9252059	0.008182031
MSTRG.12117	ENSOARG00000004289	0.967988312	0.00152072
MSTRG.12135	ENSOARG00000004289	-0.937248065	0.005783156
MSTRG.12136	ENSOARG00000004289	-0.928817129	0.00742016
MSTRG.12187	ENSOARG00000004289	0.982200088	0.000472435
MSTRG.12194	ENSOARG00000004289	-0.927807392	0.007629533
MSTRG.12213	ENSOARG00000004289	0.950611873	0.003598547
MSTRG.12227	ENSOARG00000004289	0.936642187	0.005894153
MSTRG.12245	ENSOARG00000004289	-0.951097077	0.003528768
MSTRG.12255	ENSOARG00000004289	-0.96706334	0.00160937
MSTRG.12263	ENSOARG00000004289	-0.946968668	0.004143913
MSTRG.12300	ENSOARG00000004289	0.978090588	0.000714775
MSTRG.12308	ENSOARG00000004289	0.942381379	0.004884214
MSTRG.1231	ENSOARG00000004289	-0.924047727	0.008434047
MSTRG.12312	ENSOARG00000004289	0.983855771	0.00038885
MSTRG.12374	ENSOARG00000004289	-0.939408443	0.005395779
MSTRG.12397	ENSOARG00000004289	0.973418527	0.001050471
MSTRG.124	ENSOARG00000004289	0.968604599	0.001463034
MSTRG.12413	ENSOARG00000004289	-0.967582132	0.001559343
MSTRG.12420	ENSOARG00000004289	-0.947698881	0.004031578
MSTRG.12444	ENSOARG00000004289	0.943785996	0.004651203
MSTRG.12492	ENSOARG00000004289	0.98768395	0.000226594
MSTRG.125	ENSOARG00000004289	0.949759562	0.003722746
MSTRG.12517	ENSOARG00000004289	0.951888481	0.003416395
MSTRG.12518	ENSOARG00000004289	0.927467008	0.007700753
MSTRG.12564	ENSOARG00000004289	-0.933136142	0.006556697
MSTRG.12569	ENSOARG00000004289	0.961165017	0.002232949
MSTRG.12781	ENSOARG00000004289	-0.937244333	0.005783836
MSTRG.12798	ENSOARG00000004289	0.940819775	0.005149815
MSTRG.12845	ENSOARG00000004289	0.969249974	0.001403808
MSTRG.12869	ENSOARG00000004289	-0.973210313	0.001066918
MSTRG.12870	ENSOARG00000004289	0.985749063	0.000303187
MSTRG.12935	ENSOARG00000004289	0.949969731	0.003691928
MSTRG.12937	ENSOARG00000004289	0.981590908	0.000505223
MSTRG.12948	ENSOARG00000004289	0.9211002	0.009092185
MSTRG.12956	ENSOARG00000004289	0.918947754	0.009587965
MSTRG.12978	ENSOARG00000004289	0.944933508	0.004464988
MSTRG.12984	ENSOARG00000004289	-0.96105445	0.002245598
MSTRG.13031	ENSOARG00000004289	0.97922233	0.000643082
MSTRG.13086	ENSOARG00000004289	0.932202069	0.006739021
MSTRG.13099	ENSOARG00000004289	-0.942388862	0.004882958
MSTRG.13115	ENSOARG00000004289	0.986649976	0.000266145
MSTRG.13129	ENSOARG00000004289	0.924091571	0.008424439
MSTRG.13135	ENSOARG00000004289	0.930943336	0.006988575
MSTRG.13184	ENSOARG00000004289	-0.947921556	0.003997624
MSTRG.13203	ENSOARG00000004289	0.944593736	0.004519736
MSTRG.13221	ENSOARG00000004289	0.957111725	0.002719662
MSTRG.13252	ENSOARG00000004289	0.965663292	0.001748273
MSTRG.13354	ENSOARG00000004289	0.948255463	0.003946973
MSTRG.13376	ENSOARG00000004289	0.976733499	0.000805698
MSTRG.13384	ENSOARG00000004289	0.954622028	0.00304202
MSTRG.13446	ENSOARG00000004289	0.922967834	0.008672379
MSTRG.13450	ENSOARG00000004289	0.966530772	0.001661538
MSTRG.13461	ENSOARG00000004289	0.943059167	0.004771079
MSTRG.13472	ENSOARG00000004289	0.977073567	0.000782407
MSTRG.13639	ENSOARG00000004289	-0.997058794	1.30E-05
MSTRG.13676	ENSOARG00000004289	-0.926306128	0.007946072
MSTRG.13762	ENSOARG00000004289	-0.938414168	0.00557243
MSTRG.13774	ENSOARG00000004289	0.971030018	0.001246733
MSTRG.13787	ENSOARG00000004289	0.917388348	0.009955128
MSTRG.13814	ENSOARG00000004289	-0.94895467	0.003841936
MSTRG.13828	ENSOARG00000004289	0.987863688	0.000220041
MSTRG.13830	ENSOARG00000004289	-0.938477864	0.00556103
MSTRG.13833	ENSOARG00000004289	-0.946190009	0.004265369
MSTRG.13849	ENSOARG00000004289	0.931749293	0.006828277
MSTRG.13871	ENSOARG00000004289	0.953546519	0.003186767
MSTRG.13881	ENSOARG00000004289	0.945805665	0.004325954
MSTRG.13887	ENSOARG00000004289	-0.925883557	0.008036301
MSTRG.13890	ENSOARG00000004289	0.924813839	0.008266926
MSTRG.13892	ENSOARG00000004289	-0.936022442	0.006008758
MSTRG.13923	ENSOARG00000004289	0.942022972	0.004944563
MSTRG.13998	ENSOARG00000004289	-0.919887593	0.009369916
MSTRG.14033	ENSOARG00000004289	0.950863897	0.003562219
MSTRG.14065	ENSOARG00000004289	-0.936023803	0.006008505
MSTRG.14074	ENSOARG00000004289	0.96931252	0.001398133
MSTRG.14081	ENSOARG00000004289	0.928351584	0.00751634
MSTRG.14093	ENSOARG00000004289	0.978503767	0.000688166
MSTRG.14126	ENSOARG00000004289	-0.942059536	0.00493839
MSTRG.14149	ENSOARG00000004289	0.981423897	0.000514402
MSTRG.14151	ENSOARG00000004289	0.923108697	0.008641108
MSTRG.14164	ENSOARG00000004289	0.990829725	0.000125755
MSTRG.14239	ENSOARG00000004289	-0.965889317	0.001725463
MSTRG.14255	ENSOARG00000004289	0.959556382	0.002420453
MSTRG.14286	ENSOARG00000004289	-0.923749865	0.008499462
MSTRG.14291	ENSOARG00000004289	-0.967670238	0.001550925
MSTRG.14293	ENSOARG00000004289	0.96807499	0.00151254
MSTRG.1430	ENSOARG00000004289	-0.956303579	0.002822349
MSTRG.14307	ENSOARG00000004289	0.94893657	0.003844638
MSTRG.14320	ENSOARG00000004289	-0.925725035	0.008070277
MSTRG.14378	ENSOARG00000004289	0.932670558	0.00664727
MSTRG.14393	ENSOARG00000004289	0.992571972	8.26E-05
MSTRG.144	ENSOARG00000004289	-0.981420325	0.0005146
MSTRG.14402	ENSOARG00000004289	0.947356172	0.004084111
MSTRG.14445	ENSOARG00000004289	0.953015985	0.003259388
MSTRG.14457	ENSOARG00000004289	0.96297154	0.002031275
MSTRG.14460	ENSOARG00000004289	-0.951642031	0.003451197
MSTRG.14468	ENSOARG00000004289	0.994215034	5.01E-05
MSTRG.14481	ENSOARG00000004289	0.947141485	0.00411719
MSTRG.14510	ENSOARG00000004289	0.964208547	0.001898617
MSTRG.14520	ENSOARG00000004289	0.941792991	0.00498348
MSTRG.14545	ENSOARG00000004289	0.989050841	0.00017917
MSTRG.14591	ENSOARG00000004289	0.969888668	0.001346388
MSTRG.1460	ENSOARG00000004289	0.950560792	0.003605932
MSTRG.14626	ENSOARG00000004289	0.955197149	0.002965977
MSTRG.14658	ENSOARG00000004289	0.955143123	0.00297308
MSTRG.14695	ENSOARG00000004289	-0.925155883	0.008192838
MSTRG.14698	ENSOARG00000004289	-0.954205067	0.003097744
MSTRG.14718	ENSOARG00000004289	-0.938302361	0.005592469
MSTRG.14726	ENSOARG00000004289	0.960544411	0.002304404
MSTRG.14729	ENSOARG00000004289	0.935012602	0.00619781
MSTRG.14755	ENSOARG00000004289	-0.962835806	0.002046101
MSTRG.14766	ENSOARG00000004289	-0.968032399	0.001516557
MSTRG.14801	ENSOARG00000004289	0.947861645	0.004006745
MSTRG.14893	ENSOARG00000004289	0.988384772	0.000201587
MSTRG.14899	ENSOARG00000004289	-0.982364559	0.000463771
MSTRG.14920	ENSOARG00000004289	0.967805774	0.001538018
MSTRG.14938	ENSOARG00000004289	0.932253462	0.006728925
MSTRG.14956	ENSOARG00000004289	0.927752025	0.007641096
MSTRG.1502	ENSOARG00000004289	-0.944534823	0.004529263
MSTRG.15030	ENSOARG00000004289	0.987067651	0.000249787
MSTRG.15071	ENSOARG00000004289	0.970137016	0.001324381
MSTRG.15087	ENSOARG00000004289	0.917465414	0.009936826
MSTRG.15095	ENSOARG00000004289	0.972106674	0.001156205
MSTRG.15112	ENSOARG00000004289	0.969416231	0.001388747
MSTRG.15149	ENSOARG00000004289	0.9580117	0.002607513
MSTRG.15157	ENSOARG00000004289	0.956416862	0.002807842
MSTRG.15170	ENSOARG00000004289	0.944643522	0.004511694
MSTRG.15228	ENSOARG00000004289	0.943480556	0.004701397
MSTRG.15268	ENSOARG00000004289	0.920162748	0.009306539
MSTRG.15301	ENSOARG00000004289	0.979839052	0.000605598
MSTRG.15308	ENSOARG00000004289	0.929297157	0.00732162
MSTRG.15313	ENSOARG00000004289	0.944027448	0.004611711
MSTRG.15369	ENSOARG00000004289	-0.939232709	0.005426799
MSTRG.15373	ENSOARG00000004289	-0.948468106	0.003914882
MSTRG.15387	ENSOARG00000004289	0.980097635	0.000590215
MSTRG.15392	ENSOARG00000004289	0.952226513	0.003368942
MSTRG.15393	ENSOARG00000004289	-0.924761861	0.008278213
MSTRG.15403	ENSOARG00000004289	-0.947329883	0.004088155
MSTRG.15460	ENSOARG00000004289	0.952733283	0.003298414
MSTRG.15466	ENSOARG00000004289	-0.966248164	0.001689555
MSTRG.15519	ENSOARG00000004289	0.992192654	9.12E-05
MSTRG.1554	ENSOARG00000004289	0.932306352	0.006718544
MSTRG.15578	ENSOARG00000004289	0.953228369	0.00323022
MSTRG.15585	ENSOARG00000004289	0.967843674	0.001534419
MSTRG.15627	ENSOARG00000004289	0.954517552	0.003055936
MSTRG.15657	ENSOARG00000004289	0.969457596	0.001385012
MSTRG.15667	ENSOARG00000004289	0.941335229	0.005061384
MSTRG.15691	ENSOARG00000004289	0.944264686	0.004573069
MSTRG.15700	ENSOARG00000004289	0.961272363	0.002220702
MSTRG.15713	ENSOARG00000004289	-0.939465737	0.005385685
MSTRG.15715	ENSOARG00000004289	0.922483334	0.008780358
MSTRG.15717	ENSOARG00000004289	-0.936813679	0.005862631
MSTRG.15719	ENSOARG00000004289	0.980592231	0.000561337
MSTRG.15735	ENSOARG00000004289	-0.92844134	0.00749775
MSTRG.15760	ENSOARG00000004289	0.963596526	0.001963698
MSTRG.15782	ENSOARG00000004289	-0.973574274	0.001038252
MSTRG.15807	ENSOARG00000004289	0.980529983	0.000564932
MSTRG.15847	ENSOARG00000004289	-0.971333086	0.001220909
MSTRG.15874	ENSOARG00000004289	-0.954972312	0.002995592
MSTRG.15875	ENSOARG00000004289	0.984007888	0.000381577
MSTRG.15878	ENSOARG00000004289	0.922038062	0.008880167
MSTRG.15967	ENSOARG00000004289	0.968438509	0.001478472
MSTRG.16010	ENSOARG00000004289	-0.971651289	0.001194083
MSTRG.16019	ENSOARG00000004289	0.979527062	0.000624421
MSTRG.16033	ENSOARG00000004289	0.950011672	0.003685793
MSTRG.16037	ENSOARG00000004289	0.92223516	0.008835919
MSTRG.1607	ENSOARG00000004289	0.989835679	0.000154445
MSTRG.16096	ENSOARG00000004289	0.931766468	0.006824881
MSTRG.161	ENSOARG00000004289	0.918278519	0.009744716
MSTRG.16133	ENSOARG00000004289	0.92187326	0.008917247
MSTRG.16154	ENSOARG00000004289	0.958884146	0.002501017
MSTRG.16164	ENSOARG00000004289	0.979007305	0.000656414
MSTRG.1618	ENSOARG00000004289	0.945171421	0.004426847
MSTRG.16205	ENSOARG00000004289	0.978181336	0.000708888
MSTRG.16272	ENSOARG00000004289	0.97111144	0.001239769
MSTRG.16284	ENSOARG00000004289	0.934115197	0.006368214
MSTRG.163	ENSOARG00000004289	0.966096183	0.001704718
MSTRG.16397	ENSOARG00000004289	0.934912838	0.006216642
MSTRG.16409	ENSOARG00000004289	0.958312045	0.002570604
MSTRG.16423	ENSOARG00000004289	-0.952036687	0.00339555
MSTRG.16432	ENSOARG00000004289	-0.93390691	0.006408088
MSTRG.16446	ENSOARG00000004289	0.964873861	0.001829098
MSTRG.16453	ENSOARG00000004289	-0.982822515	0.000440065
MSTRG.16463	ENSOARG00000004289	0.976480644	0.000823235
MSTRG.1647	ENSOARG00000004289	0.970667082	0.001278011
MSTRG.16509	ENSOARG00000004289	0.926434331	0.007918796
MSTRG.16512	ENSOARG00000004289	0.928249241	0.007537565
MSTRG.16531	ENSOARG00000004289	-0.969943608	0.001341504
MSTRG.16535	ENSOARG00000004289	-0.94429099	0.004568794
MSTRG.16537	ENSOARG00000004289	0.982742141	0.000444181
MSTRG.16551	ENSOARG00000004289	0.919474115	0.009465545
MSTRG.16552	ENSOARG00000004289	0.974022649	0.001003469
MSTRG.16556	ENSOARG00000004289	-0.918624692	0.00966348
MSTRG.16608	ENSOARG00000004289	-0.929808149	0.00721743
MSTRG.16638	ENSOARG00000004289	-0.920466285	0.009236868
MSTRG.16687	ENSOARG00000004289	0.991474622	0.000108713
MSTRG.1674	ENSOARG00000004289	0.957832	0.00262972
MSTRG.16776	ENSOARG00000004289	-0.953261748	0.003225647
MSTRG.168	ENSOARG00000004289	0.922525966	0.008770831
MSTRG.16804	ENSOARG00000004289	0.968806705	0.001444357
MSTRG.16826	ENSOARG00000004289	0.968270126	0.001494205
MSTRG.16831	ENSOARG00000004289	0.985614539	0.000308924
MSTRG.16838	ENSOARG00000004289	0.957136183	0.002716583
MSTRG.16856	ENSOARG00000004289	-0.932314021	0.00671704
MSTRG.16873	ENSOARG00000004289	-0.962908484	0.002038156
MSTRG.16918	ENSOARG00000004289	-0.954866309	0.003009605
MSTRG.16960	ENSOARG00000004289	-0.920037502	0.009335362
MSTRG.16967	ENSOARG00000004289	-0.929035995	0.007375151
MSTRG.17080	ENSOARG00000004289	0.929103752	0.007361245
MSTRG.17103	ENSOARG00000004289	0.922373493	0.008804928
MSTRG.17104	ENSOARG00000004289	-0.991454643	0.000109223
MSTRG.17176	ENSOARG00000004289	-0.945113454	0.004436126
MSTRG.17255	ENSOARG00000004289	-0.92125882	0.009056156
MSTRG.17261	ENSOARG00000004289	-0.939466401	0.005385568
MSTRG.1728	ENSOARG00000004289	0.958998576	0.002487211
MSTRG.17294	ENSOARG00000004289	0.958130165	0.002592924
MSTRG.17297	ENSOARG00000004289	0.990146817	0.00014515
MSTRG.17300	ENSOARG00000004289	0.951936267	0.003409667
MSTRG.17316	ENSOARG00000004289	0.964439345	0.001874356
MSTRG.17325	ENSOARG00000004289	-0.935769058	0.006055925
MSTRG.1735	ENSOARG00000004289	0.959549257	0.0024213
MSTRG.1740	ENSOARG00000004289	0.991723348	0.000102471
MSTRG.17429	ENSOARG00000004289	0.938796049	0.005504253
MSTRG.17480	ENSOARG00000004289	0.95325538	0.003226519
MSTRG.17542	ENSOARG00000004289	0.990394697	0.00013795
MSTRG.17559	ENSOARG00000004289	-0.922380231	0.00880342
MSTRG.17603	ENSOARG00000004289	0.944627987	0.004514203
MSTRG.17610	ENSOARG00000004289	0.960573589	0.00230102
MSTRG.1767	ENSOARG00000004289	-0.920949757	0.009126421
MSTRG.1768	ENSOARG00000004289	0.958165129	0.002588626
MSTRG.17682	ENSOARG00000004289	-0.929557624	0.00726842
MSTRG.17716	ENSOARG00000004289	-0.94673467	0.004180231
MSTRG.17729	ENSOARG00000004289	0.982492155	0.000457104
MSTRG.17738	ENSOARG00000004289	0.927823041	0.007626267
MSTRG.17746	ENSOARG00000004289	-0.939973953	0.005296549
MSTRG.17769	ENSOARG00000004289	-0.934328877	0.006327435
MSTRG.17773	ENSOARG00000004289	0.970186182	0.001320045
MSTRG.17789	ENSOARG00000004289	0.985741841	0.000303493
MSTRG.17792	ENSOARG00000004289	0.97373957	0.001025361
MSTRG.17849	ENSOARG00000004289	-0.929288095	0.007323474
MSTRG.17880	ENSOARG00000004289	0.95549597	0.00292684
MSTRG.17892	ENSOARG00000004289	-0.92728146	0.007739712
MSTRG.17896	ENSOARG00000004289	-0.97733769	0.000764551
MSTRG.1792	ENSOARG00000004289	-0.942166819	0.004920299
MSTRG.17927	ENSOARG00000004289	0.958342717	0.002566849
MSTRG.1793	ENSOARG00000004289	-0.935032739	0.006194012
MSTRG.17981	ENSOARG00000004289	0.928847381	0.007413931
MSTRG.17983	ENSOARG00000004289	-0.941217168	0.005081572
MSTRG.18000	ENSOARG00000004289	0.958196579	0.002584763
MSTRG.18003	ENSOARG00000004289	0.973133062	0.001073052
MSTRG.18041	ENSOARG00000004289	0.962068365	0.002130925
MSTRG.18064	ENSOARG00000004289	0.920331095	0.009267867
MSTRG.18127	ENSOARG00000004289	0.957698845	0.002646235
MSTRG.18132	ENSOARG00000004289	0.933866406	0.006415856
MSTRG.18142	ENSOARG00000004289	0.946843448	0.004163328
MSTRG.18149	ENSOARG00000004289	-0.960320474	0.00233046
MSTRG.18191	ENSOARG00000004289	0.981457301	0.00051256
MSTRG.18202	ENSOARG00000004289	0.984146355	0.000375015
MSTRG.18250	ENSOARG00000004289	0.947979715	0.003988779
MSTRG.18322	ENSOARG00000004289	0.953249298	0.003227352
MSTRG.18329	ENSOARG00000004289	0.962803244	0.002049665
MSTRG.18331	ENSOARG00000004289	0.982005307	0.0004828
MSTRG.18381	ENSOARG00000004289	0.937497294	0.005737796
MSTRG.18399	ENSOARG00000004289	-0.965005485	0.001815497
MSTRG.18419	ENSOARG00000004289	-0.947353242	0.004084562
MSTRG.18489	ENSOARG00000004289	0.984778961	0.000345757
MSTRG.1850	ENSOARG00000004289	0.957527102	0.002667611
MSTRG.18517	ENSOARG00000004289	-0.96746948	0.00157014
MSTRG.18523	ENSOARG00000004289	-0.992144711	9.23E-05
MSTRG.18540	ENSOARG00000004289	-0.982912341	0.000435487
MSTRG.18544	ENSOARG00000004289	-0.983955723	0.000384063
MSTRG.18557	ENSOARG00000004289	-0.930750142	0.007027269
MSTRG.18568	ENSOARG00000004289	0.955945953	0.002868389
MSTRG.1858	ENSOARG00000004289	-0.925173719	0.008188983
MSTRG.18603	ENSOARG00000004289	0.973466917	0.001046667
MSTRG.18610	ENSOARG00000004289	-0.928489944	0.007487692
MSTRG.1863	ENSOARG00000004289	-0.990835919	0.000125586
MSTRG.18657	ENSOARG00000004289	-0.969332936	0.001396282
MSTRG.18666	ENSOARG00000004289	-0.986647211	0.000266255
MSTRG.18687	ENSOARG00000004289	0.945387995	0.004392267
MSTRG.18691	ENSOARG00000004289	0.962155961	0.002121157
MSTRG.18694	ENSOARG00000004289	0.931496319	0.006878396
MSTRG.18768	ENSOARG00000004289	0.918034083	0.009802277
MSTRG.18790	ENSOARG00000004289	0.929209218	0.007339624
MSTRG.18811	ENSOARG00000004289	0.92477405	0.008275566
MSTRG.18840	ENSOARG00000004289	0.952837964	0.003283936
MSTRG.18884	ENSOARG00000004289	-0.927004741	0.007797991
MSTRG.18944	ENSOARG00000004289	0.945354423	0.004397619
MSTRG.18958	ENSOARG00000004289	-0.930585242	0.007060379
MSTRG.18963	ENSOARG00000004289	0.968571278	0.001466125
MSTRG.18978	ENSOARG00000004289	0.971341384	0.001220206
MSTRG.19002	ENSOARG00000004289	0.995975792	2.43E-05
MSTRG.19004	ENSOARG00000004289	0.923767565	0.008495568
MSTRG.19011	ENSOARG00000004289	0.919486598	0.009462652
MSTRG.19077	ENSOARG00000004289	0.970753748	0.001270507
MSTRG.19089	ENSOARG00000004289	0.964914128	0.001824932
MSTRG.19094	ENSOARG00000004289	0.983082278	0.000426893
MSTRG.19097	ENSOARG00000004289	0.924145928	0.008412534
MSTRG.191	ENSOARG00000004289	-0.925826232	0.008048579
MSTRG.19101	ENSOARG00000004289	0.939802614	0.005326518
MSTRG.19177	ENSOARG00000004289	0.979447134	0.000629289
MSTRG.19184	ENSOARG00000004289	0.96244888	0.002088655
MSTRG.19192	ENSOARG00000004289	0.94835365	0.003932139
MSTRG.19202	ENSOARG00000004289	0.970084899	0.001328984
MSTRG.19232	ENSOARG00000004289	0.975081045	0.000923695
MSTRG.19243	ENSOARG00000004289	0.920829343	0.009153869
MSTRG.19265	ENSOARG00000004289	0.947154317	0.004115209
MSTRG.19268	ENSOARG00000004289	0.926497129	0.007905452
MSTRG.1927	ENSOARG00000004289	-0.974898852	0.000937194
MSTRG.19270	ENSOARG00000004289	0.963006396	0.002027477
MSTRG.19303	ENSOARG00000004289	0.925481762	0.008122553
MSTRG.19304	ENSOARG00000004289	0.952134083	0.003381885
MSTRG.19343	ENSOARG00000004289	0.938129162	0.00562358
MSTRG.1936	ENSOARG00000004289	0.947622731	0.004043222
MSTRG.1937	ENSOARG00000004289	-0.963238525	0.002002269
MSTRG.1941	ENSOARG00000004289	0.974736734	0.000949287
MSTRG.1942	ENSOARG00000004289	0.92023074	0.009290911
MSTRG.19423	ENSOARG00000004289	0.970085987	0.001328888
MSTRG.19500	ENSOARG00000004289	0.931105722	0.006956132
MSTRG.19547	ENSOARG00000004289	-0.925700516	0.008075538
MSTRG.19552	ENSOARG00000004289	0.927517835	0.007690098
MSTRG.19603	ENSOARG00000004289	-0.926952429	0.007809032
MSTRG.19664	ENSOARG00000004289	0.982263003	0.000469112
MSTRG.19702	ENSOARG00000004289	0.938611273	0.00553719
MSTRG.19755	ENSOARG00000004289	0.97243545	0.001129235
MSTRG.1977	ENSOARG00000004289	-0.940854771	0.005143788
MSTRG.19773	ENSOARG00000004289	-0.940069934	0.005279796
MSTRG.19796	ENSOARG00000004289	-0.959713628	0.002401795
MSTRG.19807	ENSOARG00000004289	-0.954368718	0.003075814
MSTRG.19826	ENSOARG00000004289	0.992056087	9.44E-05
MSTRG.19838	ENSOARG00000004289	0.930248003	0.007128328
MSTRG.19840	ENSOARG00000004289	0.949035055	0.00382995
MSTRG.19843	ENSOARG00000004289	0.946694678	0.004186454
MSTRG.19845	ENSOARG00000004289	0.918080393	0.009791359
MSTRG.1987	ENSOARG00000004289	-0.951494674	0.003472089
MSTRG.19875	ENSOARG00000004289	-0.966152365	0.001699105
MSTRG.19878	ENSOARG00000004289	-0.949586337	0.003748242
MSTRG.19882	ENSOARG00000004289	0.978399565	0.000694829
MSTRG.19892	ENSOARG00000004289	0.931843492	0.00680966
MSTRG.19897	ENSOARG00000004289	0.919779864	0.009394786
MSTRG.19911	ENSOARG00000004289	0.976733282	0.000805713
MSTRG.19925	ENSOARG00000004289	-0.956042726	0.002855895
MSTRG.19967	ENSOARG00000004289	0.974852235	0.000940663
MSTRG.1999	ENSOARG00000004289	-0.929971647	0.007184247
MSTRG.19992	ENSOARG00000004289	0.917523779	0.009922975
MSTRG.19996	ENSOARG00000004289	0.964967417	0.001819425
MSTRG.200	ENSOARG00000004289	-0.950879498	0.003559976
MSTRG.20020	ENSOARG00000004289	0.96633934	0.001680491
MSTRG.20042	ENSOARG00000004289	0.921672774	0.008962457
MSTRG.2007	ENSOARG00000004289	0.944193344	0.004584673
MSTRG.20121	ENSOARG00000004289	0.948858415	0.003856313
MSTRG.20130	ENSOARG00000004289	0.967873973	0.001531544
MSTRG.20155	ENSOARG00000004289	0.948713097	0.003878069
MSTRG.20160	ENSOARG00000004289	0.977249126	0.000770515
MSTRG.20167	ENSOARG00000004289	-0.959374578	0.002442113
MSTRG.20187	ENSOARG00000004289	-0.922599081	0.008754503
MSTRG.20209	ENSOARG00000004289	0.923481967	0.008558507
MSTRG.20214	ENSOARG00000004289	0.971150188	0.001236461
MSTRG.20215	ENSOARG00000004289	-0.927388488	0.007717228
MSTRG.2023	ENSOARG00000004289	0.966315869	0.001682822
MSTRG.20235	ENSOARG00000004289	0.926991102	0.007800869
MSTRG.20251	ENSOARG00000004289	0.917593074	0.009906544
MSTRG.20312	ENSOARG00000004289	-0.917686959	0.009884302
MSTRG.20335	ENSOARG00000004289	0.960419561	0.002318913
MSTRG.20354	ENSOARG00000004289	0.930620068	0.00705338
MSTRG.20377	ENSOARG00000004289	-0.929834987	0.007211978
MSTRG.20380	ENSOARG00000004289	-0.92624068	0.007960014
MSTRG.20385	ENSOARG00000004289	-0.92478869	0.008272386
MSTRG.20443	ENSOARG00000004289	-0.950449957	0.003621982
MSTRG.20450	ENSOARG00000004289	-0.930847081	0.00700784
MSTRG.20454	ENSOARG00000004289	0.949990497	0.00368889
MSTRG.20476	ENSOARG00000004289	-0.927515655	0.007690555
MSTRG.20483	ENSOARG00000004289	0.944244379	0.004576371
MSTRG.20487	ENSOARG00000004289	0.972539421	0.001120771
MSTRG.20496	ENSOARG00000004289	-0.918377375	0.009721484
MSTRG.2052	ENSOARG00000004289	0.920505093	0.009227979
MSTRG.20534	ENSOARG00000004289	-0.974690118	0.000952779
MSTRG.20538	ENSOARG00000004289	0.978139063	0.000711627
MSTRG.20542	ENSOARG00000004289	-0.923091521	0.008644918
MSTRG.20572	ENSOARG00000004289	0.921750754	0.008944859
MSTRG.2058	ENSOARG00000004289	-0.932024823	0.006773893
MSTRG.20583	ENSOARG00000004289	-0.955677934	0.002903134
MSTRG.20626	ENSOARG00000004289	-0.921760321	0.008942701
MSTRG.20634	ENSOARG00000004289	-0.937621053	0.005715337
MSTRG.20636	ENSOARG00000004289	0.947383642	0.004079888
MSTRG.20644	ENSOARG00000004289	-0.924906568	0.008246808
MSTRG.20654	ENSOARG00000004289	-0.980467786	0.000568535
MSTRG.20658	ENSOARG00000004289	0.947871549	0.004005237
MSTRG.2066	ENSOARG00000004289	0.988232303	0.000206903
MSTRG.20668	ENSOARG00000004289	0.935992444	0.006014332
MSTRG.20724	ENSOARG00000004289	0.927113696	0.007775019
MSTRG.20762	ENSOARG00000004289	-0.942839843	0.004807546
MSTRG.20819	ENSOARG00000004289	-0.936238802	0.005968625
MSTRG.2084	ENSOARG00000004289	0.928686089	0.007447171
MSTRG.20860	ENSOARG00000004289	-0.933551889	0.006476331
MSTRG.2087	ENSOARG00000004289	-0.928470572	0.0074917
MSTRG.20881	ENSOARG00000004289	-0.947782334	0.004018836
MSTRG.20919	ENSOARG00000004289	0.992277718	8.92E-05
MSTRG.21016	ENSOARG00000004289	-0.974480382	0.000968567
MSTRG.2102	ENSOARG00000004289	0.956372221	0.002813554
MSTRG.21047	ENSOARG00000004289	0.961431593	0.002202597
MSTRG.21059	ENSOARG00000004289	0.968182807	0.001502396
MSTRG.21156	ENSOARG00000004289	-0.978692009	0.000676209
MSTRG.21170	ENSOARG00000004289	0.961978499	0.002140969
MSTRG.21181	ENSOARG00000004289	-0.935748276	0.006059801
MSTRG.21213	ENSOARG00000004289	0.96442277	0.001876093
MSTRG.21239	ENSOARG00000004289	-0.938452176	0.005565626
MSTRG.21254	ENSOARG00000004289	0.924345156	0.008368972
MSTRG.21258	ENSOARG00000004289	0.918780622	0.009626996
MSTRG.21268	ENSOARG00000004289	-0.964139698	0.001905884
MSTRG.21286	ENSOARG00000004289	0.93788793	0.005667053
MSTRG.21393	ENSOARG00000004289	0.934926867	0.006213992
MSTRG.21466	ENSOARG00000004289	-0.939934194	0.005303496
MSTRG.2157	ENSOARG00000004289	0.957631514	0.002654605
MSTRG.21595	ENSOARG00000004289	0.941921658	0.004961689
MSTRG.21597	ENSOARG00000004289	0.953909422	0.003137556
MSTRG.21624	ENSOARG00000004289	0.992944775	7.45E-05
MSTRG.21660	ENSOARG00000004289	0.963121117	0.002014999
MSTRG.21688	ENSOARG00000004289	0.962826326	0.002047138
MSTRG.21701	ENSOARG00000004289	-0.977466185	0.000755938
MSTRG.2173	ENSOARG00000004289	-0.921439111	0.009015288
MSTRG.21733	ENSOARG00000004289	-0.971313625	0.001222559
MSTRG.21735	ENSOARG00000004289	-0.943858107	0.004639391
MSTRG.21762	ENSOARG00000004289	-0.91809068	0.009788935
MSTRG.21770	ENSOARG00000004289	-0.97206693	0.001159487
MSTRG.21802	ENSOARG00000004289	0.968131106	0.001507256
MSTRG.21821	ENSOARG00000004289	-0.934350277	0.006323358
MSTRG.2183	ENSOARG00000004289	-0.948828807	0.003860741
MSTRG.21914	ENSOARG00000004289	-0.97426552	0.000984874
MSTRG.21932	ENSOARG00000004289	-0.918602939	0.009668575
MSTRG.21943	ENSOARG00000004289	0.95040789	0.003628083
MSTRG.21963	ENSOARG00000004289	0.970368226	0.001304054
MSTRG.22000	ENSOARG00000004289	0.941073631	0.00510617
MSTRG.22051	ENSOARG00000004289	0.981938754	0.000486367
MSTRG.22086	ENSOARG00000004289	-0.932580358	0.006664887
MSTRG.22092	ENSOARG00000004289	0.981603883	0.000504513
MSTRG.22110	ENSOARG00000004289	-0.926304412	0.007946438
MSTRG.22112	ENSOARG00000004289	-0.931348539	0.006907757
MSTRG.22149	ENSOARG00000004289	0.93634713	0.005948581
MSTRG.22155	ENSOARG00000004289	0.935322496	0.00613949
MSTRG.22156	ENSOARG00000004289	-0.926876633	0.007825044
MSTRG.22157	ENSOARG00000004289	0.928947207	0.007393394
MSTRG.2216	ENSOARG00000004289	0.955499412	0.002926391
MSTRG.22164	ENSOARG00000004289	0.985015196	0.000335134
MSTRG.22166	ENSOARG00000004289	-0.959940375	0.002375017
MSTRG.22207	ENSOARG00000004289	0.947572287	0.004050945
MSTRG.22239	ENSOARG00000004289	0.930295004	0.007118839
MSTRG.22252	ENSOARG00000004289	-0.971101768	0.001240595
MSTRG.2227	ENSOARG00000004289	0.960187026	0.002346056
MSTRG.22289	ENSOARG00000004289	0.952912623	0.00327363
MSTRG.2230	ENSOARG00000004289	0.95664216	0.002779099
MSTRG.22305	ENSOARG00000004289	0.93934861	0.005406331
MSTRG.22317	ENSOARG00000004289	-0.918709212	0.009643696
MSTRG.22328	ENSOARG00000004289	-0.935753871	0.006058758
MSTRG.2235	ENSOARG00000004289	0.932340744	0.006711798
MSTRG.22360	ENSOARG00000004289	0.976775188	0.000802824
MSTRG.22401	ENSOARG00000004289	-0.928178319	0.00755229
MSTRG.22425	ENSOARG00000004289	0.947139351	0.004117519
MSTRG.22460	ENSOARG00000004289	0.963525069	0.001971367
MSTRG.2251	ENSOARG00000004289	0.978523397	0.000686914
MSTRG.22550	ENSOARG00000004289	-0.990644687	0.000130873
MSTRG.22560	ENSOARG00000004289	-0.946217531	0.004261047
MSTRG.22625	ENSOARG00000004289	-0.958378694	0.002562449
MSTRG.22654	ENSOARG00000004289	-0.927161578	0.007764934
MSTRG.22657	ENSOARG00000004289	-0.947390286	0.004078867
MSTRG.22662	ENSOARG00000004289	-0.918975458	0.009581503
MSTRG.22675	ENSOARG00000004289	-0.978772209	0.000671146
MSTRG.22693	ENSOARG00000004289	0.927471767	0.007699755
MSTRG.22695	ENSOARG00000004289	0.922153806	0.00885417
MSTRG.22734	ENSOARG00000004289	0.992697227	7.98E-05
MSTRG.22754	ENSOARG00000004289	-0.924837933	0.008261697
MSTRG.2276	ENSOARG00000004289	0.930186792	0.007140695
MSTRG.22765	ENSOARG00000004289	0.984761412	0.000346553
MSTRG.22775	ENSOARG00000004289	-0.947340491	0.004086523
MSTRG.22779	ENSOARG00000004289	0.989711943	0.000158222
MSTRG.22786	ENSOARG00000004289	-0.980831325	0.000547635
MSTRG.22792	ENSOARG00000004289	-0.961776557	0.002163625
MSTRG.22794	ENSOARG00000004289	-0.974981938	0.000931026
MSTRG.22849	ENSOARG00000004289	0.963257211	0.002000247
MSTRG.2285	ENSOARG00000004289	0.944685053	0.00450499
MSTRG.22869	ENSOARG00000004289	0.980846249	0.000546786
MSTRG.2292	ENSOARG00000004289	0.966545505	0.001660084
MSTRG.22928	ENSOARG00000004289	-0.948965449	0.003840328
MSTRG.22953	ENSOARG00000004289	0.947970778	0.003990137
MSTRG.22962	ENSOARG00000004289	0.967665897	0.001551339
MSTRG.23001	ENSOARG00000004289	0.955331416	0.00294836
MSTRG.23008	ENSOARG00000004289	0.939335489	0.005408646
MSTRG.23036	ENSOARG00000004289	-0.936529607	0.005914891
MSTRG.23039	ENSOARG00000004289	0.953285979	0.00322233
MSTRG.23075	ENSOARG00000004289	0.917395469	0.009953437
MSTRG.23139	ENSOARG00000004289	-0.95064951	0.00359311
MSTRG.23162	ENSOARG00000004289	0.98054963	0.000563796
MSTRG.23210	ENSOARG00000004289	0.93338355	0.006508813
MSTRG.23223	ENSOARG00000004289	0.96190741	0.002148931
MSTRG.23224	ENSOARG00000004289	-0.934951846	0.006209276
MSTRG.23225	ENSOARG00000004289	0.949419965	0.003772809
MSTRG.23236	ENSOARG00000004289	0.975508704	0.00089239
MSTRG.23265	ENSOARG00000004289	0.920249023	0.009286711
MSTRG.23274	ENSOARG00000004289	-0.928138677	0.007560527
MSTRG.23281	ENSOARG00000004289	0.954739638	0.003026393
MSTRG.23284	ENSOARG00000004289	0.958295194	0.002572668
MSTRG.23291	ENSOARG00000004289	-0.95123234	0.003509435
MSTRG.23316	ENSOARG00000004289	-0.945435575	0.004384688
MSTRG.23320	ENSOARG00000004289	0.972549083	0.001119986
MSTRG.23325	ENSOARG00000004289	-0.944477664	0.004538515
MSTRG.23367	ENSOARG00000004289	-0.939269979	0.005420213
MSTRG.23377	ENSOARG00000004289	0.936171895	0.005981022
MSTRG.23384	ENSOARG00000004289	-0.963337398	0.00199158
MSTRG.23400	ENSOARG00000004289	0.986715363	0.00026355
MSTRG.23445	ENSOARG00000004289	0.971257045	0.001227363
MSTRG.23512	ENSOARG00000004289	0.936530819	0.005914668
MSTRG.23533	ENSOARG00000004289	-0.948387571	0.00392702
MSTRG.23558	ENSOARG00000004289	-0.934735645	0.006250159
MSTRG.23571	ENSOARG00000004289	0.953315511	0.003218289
MSTRG.23578	ENSOARG00000004289	-0.929831566	0.007212673
MSTRG.23590	ENSOARG00000004289	0.943377067	0.004718464
MSTRG.23594	ENSOARG00000004289	0.985047249	0.000333706
MSTRG.23610	ENSOARG00000004289	0.932436888	0.006692956
MSTRG.2364	ENSOARG00000004289	-0.926744003	0.0078531
MSTRG.23652	ENSOARG00000004289	-0.948658262	0.003886293
MSTRG.23653	ENSOARG00000004289	-0.91860795	0.009667401
MSTRG.23692	ENSOARG00000004289	-0.928765719	0.007430751
MSTRG.23745	ENSOARG00000004289	0.943232194	0.004742406
MSTRG.23755	ENSOARG00000004289	0.995386015	3.19E-05
MSTRG.23791	ENSOARG00000004289	0.988900056	0.000184129
MSTRG.23803	ENSOARG00000004289	0.948869138	0.00385471
MSTRG.23813	ENSOARG00000004289	0.940021718	0.005288209
MSTRG.23819	ENSOARG00000004289	-0.926257874	0.007956351
MSTRG.23843	ENSOARG00000004289	0.968354036	0.001486354
MSTRG.23854	ENSOARG00000004289	-0.958590778	0.002536583
MSTRG.23887	ENSOARG00000004289	0.926864503	0.007827608
MSTRG.23899	ENSOARG00000004289	0.993373948	6.57E-05
MSTRG.2395	ENSOARG00000004289	0.958136241	0.002592177
MSTRG.24007	ENSOARG00000004289	-0.919125384	0.009546567
MSTRG.24052	ENSOARG00000004289	0.929774276	0.007224314
MSTRG.2407	ENSOARG00000004289	-0.948113669	0.003968443
MSTRG.24072	ENSOARG00000004289	0.989784824	0.000155992
MSTRG.2409	ENSOARG00000004289	0.917558962	0.009914631
MSTRG.24138	ENSOARG00000004289	0.958120784	0.002594078
MSTRG.24145	ENSOARG00000004289	-0.923442982	0.008567116
MSTRG.2419	ENSOARG00000004289	0.934955141	0.006208653
MSTRG.24192	ENSOARG00000004289	0.917562559	0.009913778
MSTRG.2427	ENSOARG00000004289	0.923976974	0.008449563
MSTRG.24280	ENSOARG00000004289	-0.946934595	0.004149191
MSTRG.24326	ENSOARG00000004289	-0.918669861	0.009652904
MSTRG.24331	ENSOARG00000004289	0.947587485	0.004048617
MSTRG.24402	ENSOARG00000004289	-0.968165585	0.001504014
MSTRG.24412	ENSOARG00000004289	-0.956381976	0.002812306
MSTRG.24422	ENSOARG00000004289	0.939851539	0.005317952
MSTRG.24432	ENSOARG00000004289	0.978031421	0.000718626
MSTRG.24473	ENSOARG00000004289	0.993399849	6.52E-05
MSTRG.24505	ENSOARG00000004289	0.975185012	0.000916035
MSTRG.24550	ENSOARG00000004289	-0.938621722	0.005535325
MSTRG.24592	ENSOARG00000004289	0.931847303	0.006808908
MSTRG.246	ENSOARG00000004289	0.98376531	0.000393208
MSTRG.24607	ENSOARG00000004289	0.937307174	0.005772382
MSTRG.24670	ENSOARG00000004289	0.926911978	0.007817575
MSTRG.24684	ENSOARG00000004289	-0.934149638	0.006361633
MSTRG.24850	ENSOARG00000004289	0.981059573	0.000534712
MSTRG.24874	ENSOARG00000004289	0.960585345	0.002299657
MSTRG.24881	ENSOARG00000004289	0.955913513	0.002872584
MSTRG.2490	ENSOARG00000004289	0.988721072	0.000190104
MSTRG.2500	ENSOARG00000004289	-0.92603877	0.008003102
MSTRG.25031	ENSOARG00000004289	0.95407499	0.003115229
MSTRG.25061	ENSOARG00000004289	-0.962386235	0.002095585
MSTRG.25115	ENSOARG00000004289	-0.939422726	0.005393262
MSTRG.25116	ENSOARG00000004289	0.943394583	0.004715573
MSTRG.25162	ENSOARG00000004289	-0.925390436	0.00814222
MSTRG.2573	ENSOARG00000004289	-0.917667388	0.009888936
MSTRG.2590	ENSOARG00000004289	-0.958900801	0.002499005
MSTRG.2625	ENSOARG00000004289	0.978816792	0.00066834
MSTRG.2633	ENSOARG00000004289	-0.944094586	0.004600759
MSTRG.2659	ENSOARG00000004289	0.962087027	0.002128842
MSTRG.2688	ENSOARG00000004289	0.979201564	0.000644364
MSTRG.2710	ENSOARG00000004289	0.934655497	0.006265349
MSTRG.2735	ENSOARG00000004289	-0.930095495	0.007159161
MSTRG.2750	ENSOARG00000004289	-0.968291283	0.001492223
MSTRG.2783	ENSOARG00000004289	0.968360361	0.001485763
MSTRG.2825	ENSOARG00000004289	0.964464222	0.00187175
MSTRG.2906	ENSOARG00000004289	-0.929555521	0.007268849
MSTRG.2927	ENSOARG00000004289	0.984647997	0.000351717
MSTRG.2945	ENSOARG00000004289	0.923986935	0.008447378
MSTRG.2959	ENSOARG00000004289	-0.920829741	0.009153778
MSTRG.2976	ENSOARG00000004289	-0.924842602	0.008260683
MSTRG.300	ENSOARG00000004289	0.927936101	0.007602687
MSTRG.3019	ENSOARG00000004289	0.971580736	0.001200005
MSTRG.3060	ENSOARG00000004289	0.975027614	0.000927643
MSTRG.3073	ENSOARG00000004289	0.945180997	0.004425316
MSTRG.3081	ENSOARG00000004289	0.965215846	0.001793863
MSTRG.3084	ENSOARG00000004289	0.964354623	0.001883244
MSTRG.3100	ENSOARG00000004289	-0.939676063	0.005348707
MSTRG.3104	ENSOARG00000004289	0.925668168	0.008082482
MSTRG.3112	ENSOARG00000004289	0.934396232	0.006314607
MSTRG.3117	ENSOARG00000004289	0.974078107	0.000999208
MSTRG.3118	ENSOARG00000004289	0.949390985	0.003777097
MSTRG.3122	ENSOARG00000004289	0.97376476	0.001023403
MSTRG.3123	ENSOARG00000004289	-0.983960561	0.000383832
MSTRG.3134	ENSOARG00000004289	-0.934701049	0.006256714
MSTRG.320	ENSOARG00000004289	-0.972249187	0.001144476
MSTRG.3247	ENSOARG00000004289	0.975878744	0.000865735
MSTRG.326	ENSOARG00000004289	0.974842009	0.000941425
MSTRG.3290	ENSOARG00000004289	0.994634135	4.31E-05
MSTRG.3293	ENSOARG00000004289	0.963369852	0.001988077
MSTRG.3314	ENSOARG00000004289	-0.941287249	0.005069584
MSTRG.3320	ENSOARG00000004289	0.968949585	0.001431224
MSTRG.3322	ENSOARG00000004289	0.965982009	0.001716152
MSTRG.335	ENSOARG00000004289	0.969279432	0.001401134
MSTRG.3360	ENSOARG00000004289	0.991210364	0.000115547
MSTRG.3400	ENSOARG00000004289	0.940559541	0.005194746
MSTRG.3407	ENSOARG00000004289	0.981284142	0.000522147
MSTRG.3422	ENSOARG00000004289	0.944438616	0.00454484
MSTRG.3515	ENSOARG00000004289	0.943413905	0.004712385
MSTRG.3528	ENSOARG00000004289	-0.92069212	0.009185197
MSTRG.3579	ENSOARG00000004289	0.926286755	0.007950198
MSTRG.3634	ENSOARG00000004289	-0.921779291	0.008938423
MSTRG.3731	ENSOARG00000004289	0.93650757	0.005918955
MSTRG.3759	ENSOARG00000004289	0.941969027	0.004953678
MSTRG.3780	ENSOARG00000004289	0.937374074	0.0057602
MSTRG.3804	ENSOARG00000004289	0.993053237	7.22E-05
MSTRG.3809	ENSOARG00000004289	0.986215264	0.000283719
MSTRG.3825	ENSOARG00000004289	0.955452746	0.002932486
MSTRG.3836	ENSOARG00000004289	0.951048975	0.003535656
MSTRG.3848	ENSOARG00000004289	0.990216486	0.000143107
MSTRG.3860	ENSOARG00000004289	0.982655507	0.000448638
MSTRG.3873	ENSOARG00000004289	0.943805776	0.004647961
MSTRG.3894	ENSOARG00000004289	0.93946445	0.005385911
MSTRG.3953	ENSOARG00000004289	0.93581761	0.006046873
MSTRG.3959	ENSOARG00000004289	0.919649986	0.009424812
MSTRG.3980	ENSOARG00000004289	0.947172106	0.004112464
MSTRG.3981	ENSOARG00000004289	0.927449403	0.007704445
MSTRG.4016	ENSOARG00000004289	0.945486342	0.004376608
MSTRG.4040	ENSOARG00000004289	0.967263267	0.001589999
MSTRG.4045	ENSOARG00000004289	0.947213658	0.004106055
MSTRG.4059	ENSOARG00000004289	0.969240652	0.001404655
MSTRG.407	ENSOARG00000004289	-0.942741449	0.00482395
MSTRG.4111	ENSOARG00000004289	0.976955089	0.000790483
MSTRG.4141	ENSOARG00000004289	0.970326223	0.001307735
MSTRG.4147	ENSOARG00000004289	0.938033021	0.005640886
MSTRG.4150	ENSOARG00000004289	0.923332339	0.008591572
MSTRG.4157	ENSOARG00000004289	0.954333086	0.003080582
MSTRG.4233	ENSOARG00000004289	-0.917334062	0.009968031
MSTRG.4240	ENSOARG00000004289	0.932264435	0.006726771
MSTRG.425	ENSOARG00000004289	0.955562898	0.00291811
MSTRG.4287	ENSOARG00000004289	-0.993616198	6.10E-05
MSTRG.4296	ENSOARG00000004289	-0.942097347	0.00493201
MSTRG.43	ENSOARG00000004289	0.972096349	0.001157058
MSTRG.4305	ENSOARG00000004289	0.924257404	0.008388146
MSTRG.4312	ENSOARG00000004289	0.987496303	0.000233536
MSTRG.4318	ENSOARG00000004289	0.95253971	0.003325267
MSTRG.432	ENSOARG00000004289	0.923520972	0.008549898
MSTRG.434	ENSOARG00000004289	0.960434727	0.002317148
MSTRG.4357	ENSOARG00000004289	-0.967985333	0.001521002
MSTRG.4385	ENSOARG00000004289	0.923135014	0.008635271
MSTRG.4497	ENSOARG00000004289	0.944428812	0.004546429
MSTRG.4522	ENSOARG00000004289	0.94668663	0.004187706
MSTRG.4591	ENSOARG00000004289	0.926144141	0.007980602
MSTRG.4606	ENSOARG00000004289	-0.967269285	0.001589417
MSTRG.4637	ENSOARG00000004289	-0.968356498	0.001486124
MSTRG.4683	ENSOARG00000004289	0.978222568	0.000706221
MSTRG.4768	ENSOARG00000004289	0.952558625	0.003322638
MSTRG.4791	ENSOARG00000004289	0.951077379	0.003531588
MSTRG.4826	ENSOARG00000004289	-0.965136361	0.001802022
MSTRG.4843	ENSOARG00000004289	0.980506964	0.000566264
MSTRG.4878	ENSOARG00000004289	0.92460082	0.008313231
MSTRG.4901	ENSOARG00000004289	-0.95857947	0.002537959
MSTRG.4908	ENSOARG00000004289	-0.954566752	0.003049379
MSTRG.4940	ENSOARG00000004289	0.940640365	0.005180771
MSTRG.5025	ENSOARG00000004289	0.975637701	0.000883053
MSTRG.5029	ENSOARG00000004289	0.962669874	0.002064297
MSTRG.5034	ENSOARG00000004289	0.975564286	0.000888361
MSTRG.5064	ENSOARG00000004289	0.926903256	0.007819418
MSTRG.5083	ENSOARG00000004289	0.964247497	0.001894512
MSTRG.5084	ENSOARG00000004289	0.943905978	0.004631558
MSTRG.5136	ENSOARG00000004289	0.922622762	0.008749217
MSTRG.52	ENSOARG00000004289	0.988707477	0.000190562
MSTRG.5288	ENSOARG00000004289	-0.922404506	0.008797987
MSTRG.5300	ENSOARG00000004289	0.978992715	0.000657324
MSTRG.5304	ENSOARG00000004289	0.994792175	4.06E-05
MSTRG.5315	ENSOARG00000004289	0.976452151	0.000825223
MSTRG.535	ENSOARG00000004289	0.948933767	0.003845056
MSTRG.5370	ENSOARG00000004289	0.94826886	0.003944947
MSTRG.5414	ENSOARG00000004289	0.948563052	0.003900595
MSTRG.5492	ENSOARG00000004289	-0.921304785	0.009045728
MSTRG.5502	ENSOARG00000004289	0.922549202	0.00876564
MSTRG.5511	ENSOARG00000004289	-0.952888572	0.003276948
MSTRG.5521	ENSOARG00000004289	0.953560099	0.003184919
MSTRG.5560	ENSOARG00000004289	0.956935957	0.002741836
MSTRG.5588	ENSOARG00000004289	0.942410106	0.004879393
MSTRG.5591	ENSOARG00000004289	0.923230096	0.008614201
MSTRG.5616	ENSOARG00000004289	0.992827928	7.70E-05
MSTRG.5628	ENSOARG00000004289	0.979008184	0.000656359
MSTRG.5630	ENSOARG00000004289	0.986256544	0.000282026
MSTRG.5631	ENSOARG00000004289	0.951320266	0.003496896
MSTRG.5648	ENSOARG00000004289	0.960534122	0.002305598
MSTRG.5667	ENSOARG00000004289	-0.96787145	0.001531783
MSTRG.5692	ENSOARG00000004289	0.954934708	0.00300056
MSTRG.5713	ENSOARG00000004289	-0.930514423	0.007074621
MSTRG.5719	ENSOARG00000004289	0.936453121	0.005929001
MSTRG.5732	ENSOARG00000004289	-0.951177236	0.003517305
MSTRG.5771	ENSOARG00000004289	0.928671097	0.007450265
MSTRG.5832	ENSOARG00000004289	-0.94218023	0.004918039
MSTRG.5860	ENSOARG00000004289	0.971549007	0.001202674
MSTRG.5927	ENSOARG00000004289	0.959031256	0.002483275
[truncated: 171,269 more rows]
